# Supplementary material for: Lipid metabolism of plasma-derived small extracellular vesicles in COVID-19 convalescent patients
Source: PubMed Central journal article supplement (PMC10547714; doi:10.1038/s41598-023-43189-5), 2023-10-03
Supplement: 41598_2023_43189_MOESM1_ESM.pdf [file 41598_2023_43189_MOESM1_ESM.pdf]

**Lipid metabolism of plasma-derived small extracellular vesicles in COVID-19  
convalescent patients**

Wenjing Xiao<sup>a,b,†</sup>, Qi Huang<sup>a,b,†</sup>, Ping Luo<sup>c,†</sup>, Xueyun Tan<sup>a</sup>, Hui Xia<sup>a</sup>, Sufei Wang<sup>a</sup>, Yice Sun<sup>a</sup>, Zhihui Wang<sup>d</sup>, Yanling Ma<sup>a</sup>, Jianchu Zhang<sup>a,b,\*</sup>, Yang Jin<sup>a,b,e\*</sup>

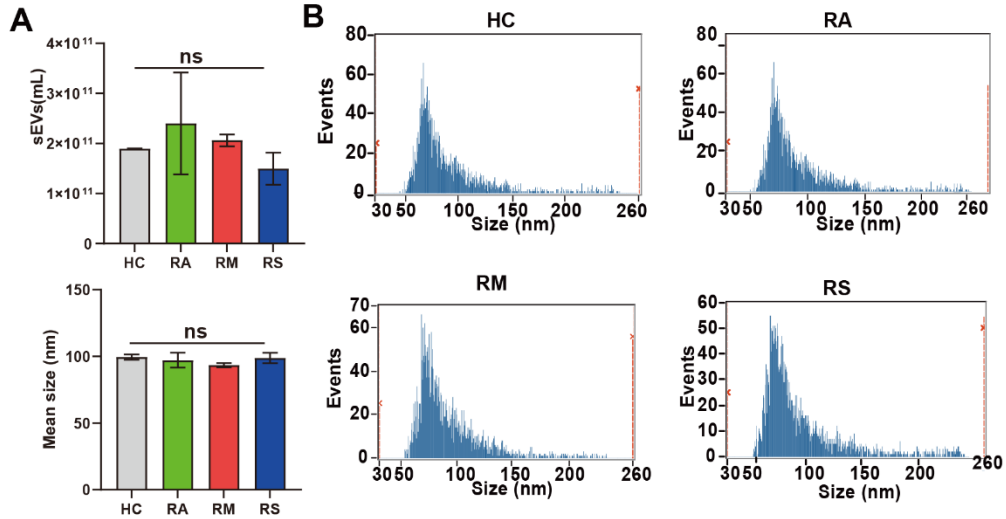

**Figure S1. (A)** Average size comparison and concentration of small extracellular vesicles (sEVs) from the plasma of recovered asymptomatic patients (RAs, n=18), recovered moderate patients (RMs, n=32), and recovered severe and critical patients (RSs, n=33), and healthy controls (HCs, n=19). **(B)** The size distribution of the purified sEVs isolated from plasma of HCs, RAs, RMs, and RSs as revealed by Flow Nano Analyzer.

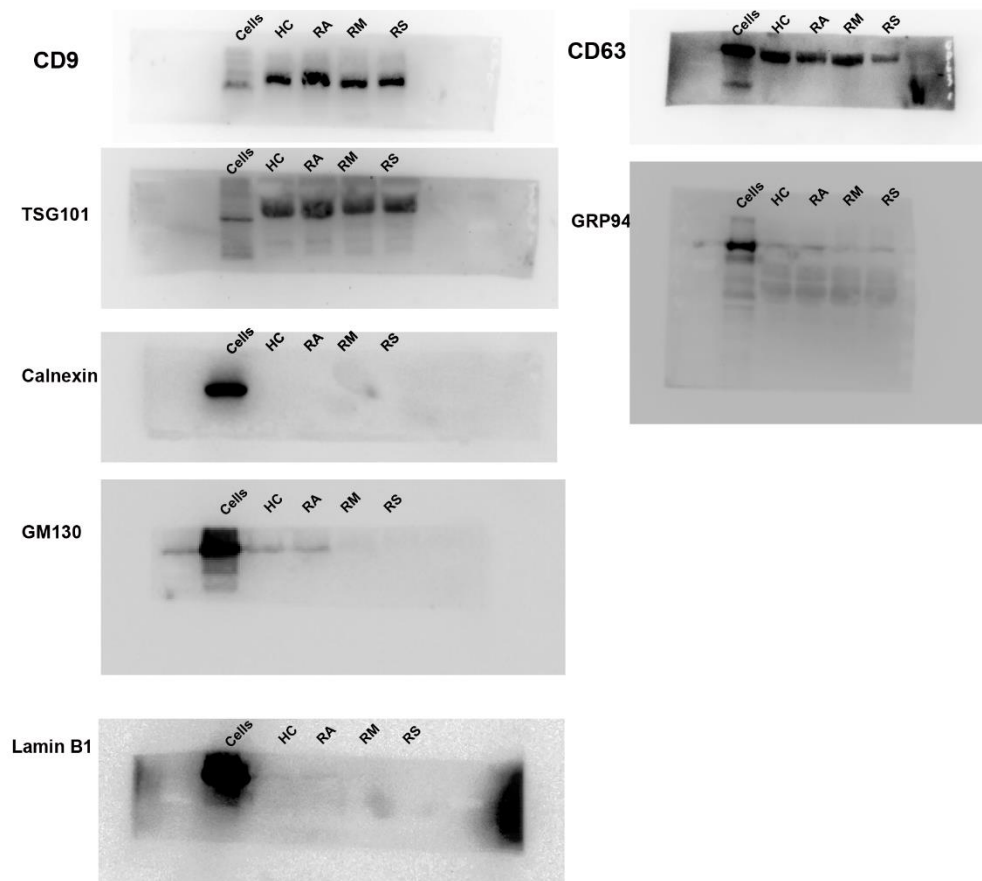

**Figure S2.** Original blots with membrane edges visible of Figure 1E.

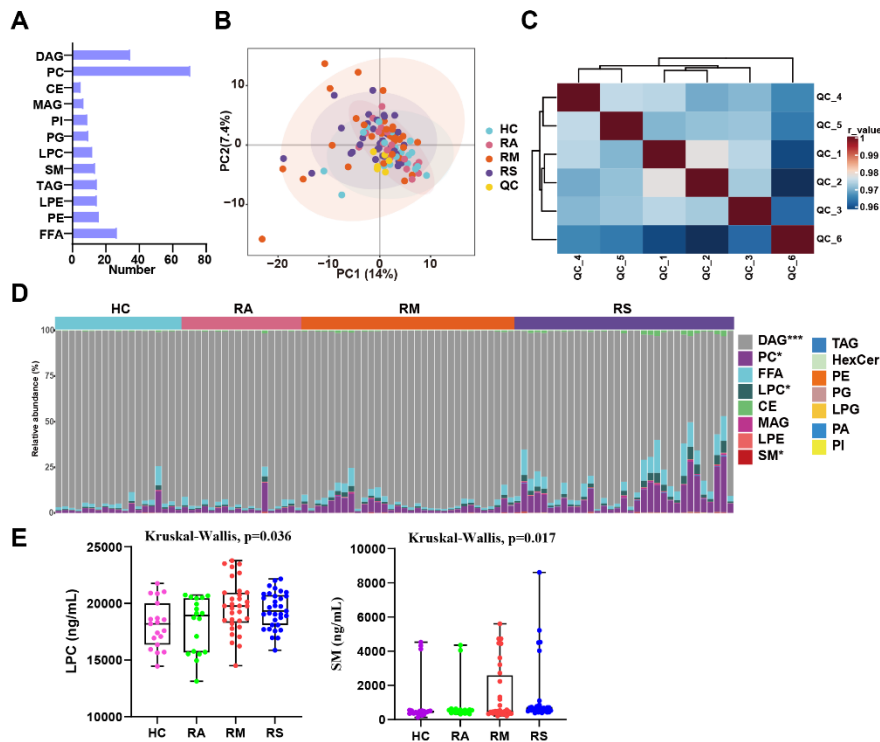

**Figure S3.** (A) The number of identified lipids subclasses. (B) The PCA score plot shows the clustering of quality control (QC) samples from recovered asymptomatic patients (RAs), recovered moderate patients (RMs), and recovered severe and critical patients (RSs), and healthy controls (HCs). (C) The correlation coefficient of QC samples was indicated with Pearson correlation. (D) This graph represents the average percentage of lipids subclasses of each sample from HCs, RAs, RMs, and RSs. (E) lipids subclasses lysophosphatidylcholines and sphingomyelins (SMs) in RAs, RMs, RSs, and HCs. Data were displayed as boxplots with median and range and each dot represents an individual: HC (Pink), RA (Green), RM (Red), RS (Blue).

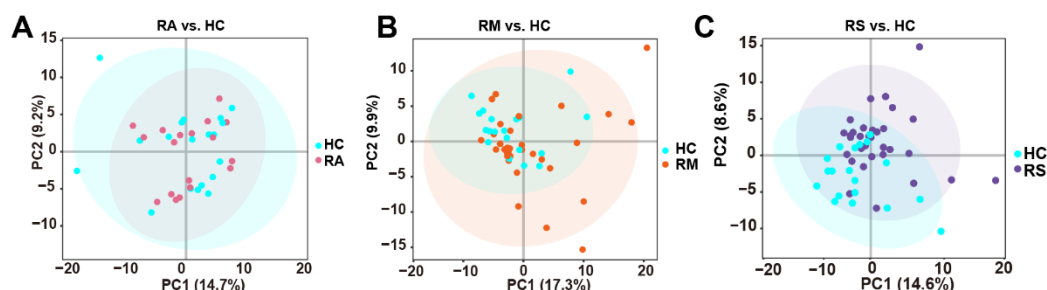

**Figure S4.** (A–C) PCA score plots of lipid profiles detected in plasma sEVs in RAs (A), RMs (B), and RCs (C) compared with HCs, respectively. p-value: \* $p<0.05$ ; \*\* $p<0.01$ ; \*\*\* $p<0.001$ .

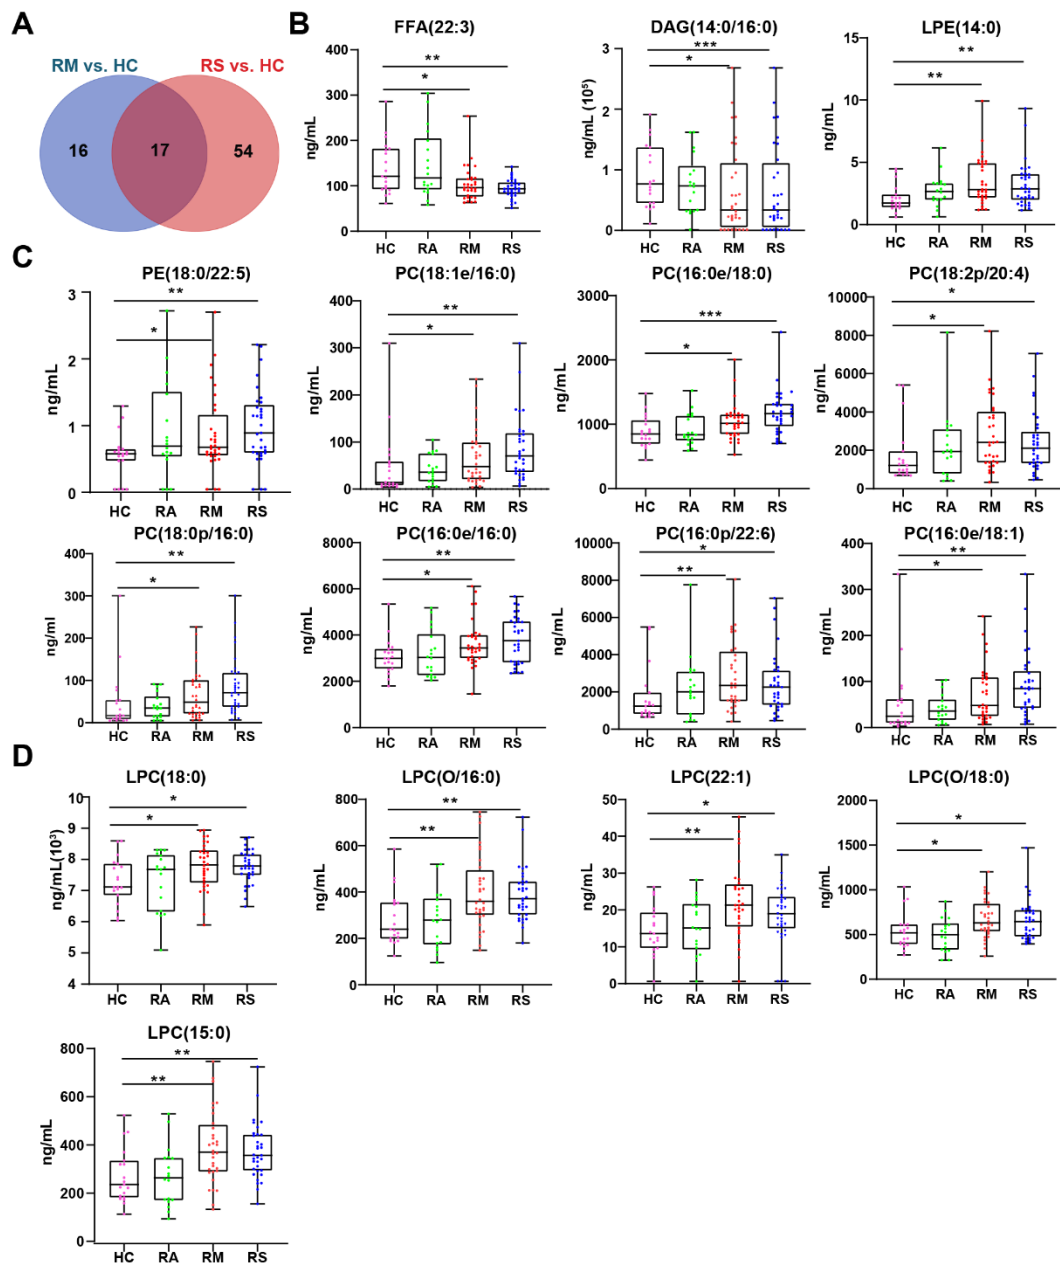

**Figure S5.** Significantly altered lipids in RM and RS compared to HCs. **(A)** Venn diagram showing the number of significantly changed lipids in recovered moderate patients (RMs) and recovered severe and critical patients (RSs) relative to healthy controls (HCs). **(B–D)** The significance of comparisons of the four groups was determined by the Kruskal-Wallis test (data with non-normal distribution) or one-way ANOVA (data with normal distribution) and indicated as an absolute overall p-value. \* $p < 0.05$ ; \*\* $p < 0.01$ ; \*\*\* $p < 0.001$ .

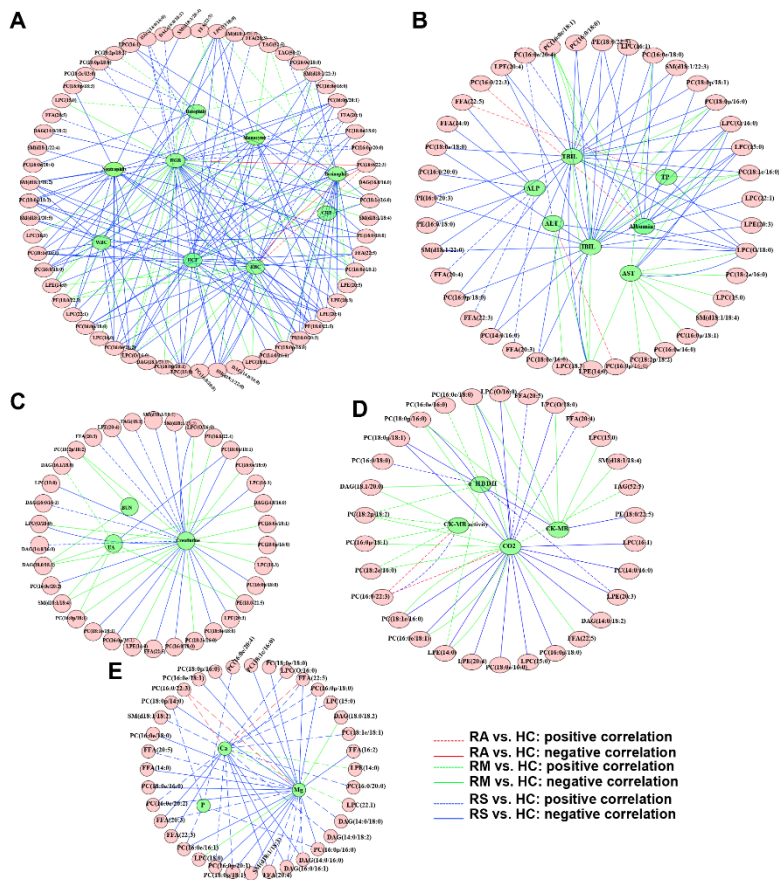

**Figure S6. Network interactions between clinical indices and differential lipids identified in RAs, RMs, and RSs relative to HCs.** Correlation analysis was performed based on the levels of differential lipids identified from recovered asymptomatic patients (RAs), recovered moderate patients (RMs), and recovered severe and critical patients (RSs) and clinical parameters, including inflammation-related indicators (A), hepatic function (B), renal function (C), cardiac function (D), and electrolyte (E). Only correlations with correlation coefficients  $|R|$  greater than 0.4 and  $p < 0.05$  were left. Red, green, and blue represent RA vs. HC, RM vs. HC, and RS vs. HC groups. Continuous and dashed lines indicated negative or positive correlation, respectively.

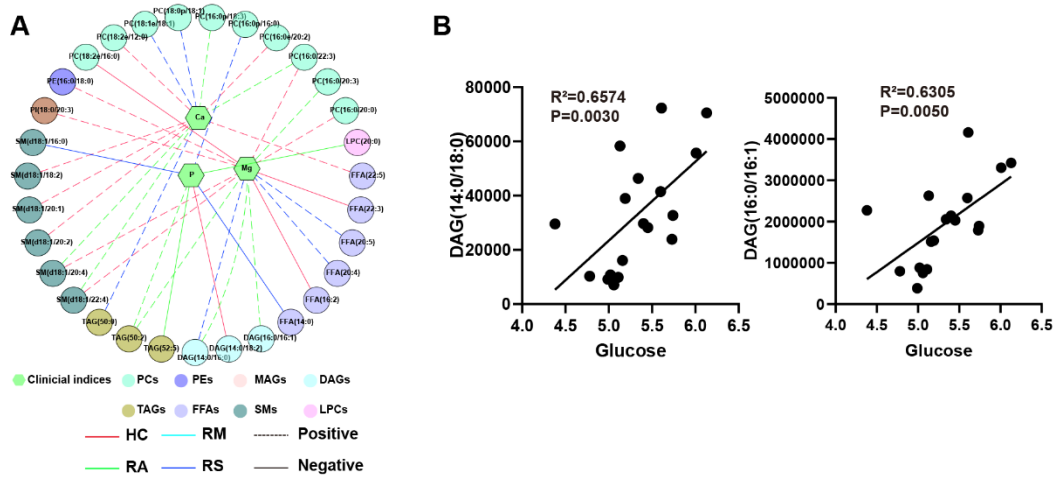

**Figure S7.** Network of interactions between electrolyte equilibrium and differential lipids identified in RCs and HCs (A). Only correlations with absolute values of correlation coefficients greater than 0.5 and  $p < 0.05$  were left. Correlations between four groups (HCs, RAs, RMs, and RSs) with clinical indices were red, cyan, green, and blue. Continuous and dashed lines indicated negative and positive correlations, respectively. (B) The correlation of DAG (14:0/18:0) and DAG(16:0/16:1) with glucose in RA sEVs. Abbreviation: and. CE, Cholesteryl ester; Cer, Ceramide; DAG, Diacylglycerol; FFA, free fatty acid; HexCer, Hexosylceramide; LPA, lysoPhosphatidic acid; LPC, lysoPhosphatidylcholine; LPE, lysoPhosphatidylethanolamine; MAG, Monoacylglycerol; PA, phosphatidic acid; PC, phosphatidylcholine; PE, phosphatidylethanolamine; PG, Phosphatidylglycerol; recovered asymptomatic patients, RAs; RMs, recovered moderate patients; RSs, recovered severe and critical patients; SM, sphingomyelin; TAG, triacylglycerol.

**Table S1. Clinical characteristics of RCs without underlying diseases 3 months after discharge**

| Variables                          | HC (n=19)         | COVID-19 patients on admission  |                                 | COVID-19 patients 3 months after discharge |                                  |                                |
|------------------------------------|-------------------|---------------------------------|---------------------------------|--------------------------------------------|----------------------------------|--------------------------------|
|                                    |                   | M (n=32)                        | S (n=33)                        | RA (n=18)                                  | RM (n=32)                        | RS (n=33)                      |
| <b>Characteristics</b>             |                   |                                 |                                 |                                            |                                  |                                |
| Age, years                         | 45 (38–54)        | 45 (38.25–52)                   | 46 (36–54.5)                    | 46.5 (38–55.25)                            | 45 (38.25–52)                    | 46 (36–54.5)                   |
| <b>Sex</b>                         |                   |                                 |                                 |                                            |                                  |                                |
| Female                             | 8 (42.10%)        | 19 (59.40%)                     | 19 (57.60%)                     | 7 (38.90%)                                 | 19 (59.40%)                      | 19 (57.60%)                    |
| Male                               | 11 (57.90%)       | 13 (40.60%)                     | 14 (42.40%)                     | 11 (61.10%)                                | 13 (40.60%)                      | 14 (42.40%)                    |
| BMI, kg/m <sup>2</sup>             | 23.6 (21.67–25.6) | 22.77 (20.99–25.06)             | 23.6 (22.17–26.83)              | 24.55 (23.33–25.73)                        | 22.77 (20.99–25.06)              | 23.6 (22.17–26.83)             |
| <b>Laboratory findings</b>         |                   |                                 |                                 |                                            |                                  |                                |
| <b>SARS-CoV-2</b>                  |                   |                                 |                                 |                                            |                                  |                                |
| nucleic acid test (+)              | 0 (0.00)          | 0 (0.00)                        | 0 (0.00)                        | 0 (0.00)                                   | 0 (0.00)                         | 0 (0.00)                       |
| IgG (+)                            | 0 (0.00)          | –                               | –                               | 16 (88.90%)                                | 29 (96.7%)                       | 30 (96.8%)                     |
| IgM (+)                            | 0 (0.00)          | –                               | –                               | 2 (11.1%)                                  | 5 (15.6%)                        | 5 (16.1%)                      |
| CRP, mg/L                          | 0.76 (0.44–2.68)  | 3.8 (0.1–7.85) <sup>a</sup>     | 7.71 (2.42–27.97) <sup>a</sup>  | 0.69 (0.08–1.39)                           | 0.41 (0.13–1.25) <sup>b</sup>    | 0.74 (0.38–1.42) <sup>c</sup>  |
| WBC, × 10 <sup>9</sup> per L       | 5.55 (4.74–6.3)   | 5.57 (4.25–6.86)                | 5.07 (3.96–6.48)                | 5.25 (4.89–5.81)                           | 4.89 (4.32–6.1)                  | 5.12 (4–5.6)                   |
| RBC, × 10 <sup>12</sup> per L      | 4.87 (4.54–5.3)   | 4.15 (3.9–4.5) <sup>a</sup>     | 4.35 (3.73–4.79) <sup>a</sup>   | 4.9 (4.42–5.36)                            | 4.65 (4.34–5.06) <sup>b</sup>    | 4.72 (4.36–5.26) <sup>c</sup>  |
| Haemoglobin, g/L                   | 155 (143.5–164)   | 128 (120–137) <sup>a</sup>      | 130 (119–147) <sup>a</sup>      | 151 (137.25–162)                           | 142 (140–157) <sup>b</sup>       | 144 (136–160.5) <sup>c</sup>   |
| Hematocrit, %                      | 45.3 (42.2–48.5)  | 38.1 (36.23–41.05) <sup>a</sup> | 38.8 (34.85–43.6) <sup>a</sup>  | 44.95 (42–47.83)                           | 43.95 (40.53–48.53) <sup>b</sup> | 43.8 (41.2–47.75) <sup>c</sup> |
| MCV, fl                            | 93.1 (89.9–96.35) | 91.55 (88.93–96.63)             | 92.1 (89.9–93.8)                | 93.05 (89.35–96.2)                         | 92.45 (89.18–95.38)              | 92.8 (90.3–94.45)              |
| MCH, pg                            | 31.3 (30.2–32.75) | 30.75 (29.8–32.23)              | 30.9 (30–31.65)                 | 31.4 (29.8–32.78)                          | 30.85 (30–32)                    | 30.9 (30.25–31.75)             |
| MCHC, g/L                          | 338 (334.5–343)   | 333 (326.75–336.25)             | 334 (331–338) <sup>a</sup>      | 339.5 (332.75–345.25)                      | 336.5 (330.5–339.75)             | 335 (330.5–339.5)              |
| Platelets, × 10 <sup>9</sup> per L | 219 (182.5–262.5) | 205 (175–257)                   | 228 (164.5–266.5)               | 194 (184–221)                              | 212 (187.5–236.75)               | 216 (182.5–234)                |
| Percentage of                      | 34.3 (27.8–39.2)  | 29.65 (22.33–37.93)             | 26.6 (18.25–33.65) <sup>a</sup> | 27.95 (25.48–37.9)                         | 35.05 (29.55–40.98)              | 34 (28.4–40.5) <sup>c</sup>    |



|                                       |                   |                               |                               |                    |                                |                               |
|---------------------------------------|-------------------|-------------------------------|-------------------------------|--------------------|--------------------------------|-------------------------------|
| <b>lymphocytes, %</b>                 |                   |                               |                               |                    |                                |                               |
| <b>Percentage of</b>                  |                   |                               |                               |                    |                                |                               |
| <b>monocytes, %</b>                   | 4.8 (4.45–5.2)    | 6.75 (6.1–8.73) <sup>a</sup>  | 7.7 (4.75–9.7) <sup>a</sup>   | 5.3 (4.43–6.1)     | 5.3 (4.83–6.5) <sup>ab</sup>   | 5.2 (4.45–5.9) <sup>c</sup>   |
| <b>Percentage of</b>                  |                   |                               |                               |                    |                                |                               |
| <b>eosinophils, %</b>                 | 2.5 (1.15–4.3)    | 1.85 (1.18–3.68)              | 0.7 (0.1–1.85) <sup>a</sup>   | 1.4 (0.98–1.95)    | 1.85 (1.3–2.73)                | 1.8 (1.25–3.3) <sup>c</sup>   |
| <b>Percentage of</b>                  |                   |                               |                               |                    |                                |                               |
| <b>basophils, %</b>                   | 0.1 (0.1–0.25)    | 0.35 (0.2–0.5) <sup>a</sup>   | 0.3 (0.2–0.5) <sup>a</sup>    | 0.1 (0.1–0.23)     | 0.2 (0.1–0.3)                  | 0.2 (0.05–0.3)                |
| <b>Neutrophils, ×10<sup>9</sup></b>   |                   |                               |                               |                    |                                |                               |
| <b>per L</b>                          | 3.15 (2.78–3.6)   | 3.35 (2.33–4.6)               | 3.17 (2.17–4.48) <sup>a</sup> | 3.29 (2.74–3.59)   | 2.7 (2.31–3.55)                | 2.92 (2.3–3.15)               |
| <b>Lymphocytes, ×10<sup>9</sup></b>   |                   |                               |                               |                    |                                |                               |
| <b>per L</b>                          | 1.83 (1.43–2.45)  | 1.61 (1.33–2.04)              | 1.35 (0.89–1.77) <sup>a</sup> | 1.56 (1.25–2.04)   | 1.77 (1.48–2.09)               | 1.6 (1.35–2.05)               |
| <b>Monocytes, ×10<sup>9</sup></b>     |                   |                               |                               |                    |                                |                               |
| <b>per L</b>                          | 0.26 (0.22–0.3)   | 0.37 (0.29–0.46) <sup>a</sup> | 0.37 (0.28–0.43) <sup>a</sup> | 0.3 (0.23–0.31)    | 0.29 (0.23–0.35) <sup>b</sup>  | 0.26 (0.19–0.32) <sup>c</sup> |
| <b>Eosinophils, ×10<sup>9</sup></b>   |                   |                               |                               |                    |                                |                               |
| <b>per L</b>                          | 0.13 (0.08–0.21)  | 0.09 (0.04–0.2)               | 0.04 (0.01–0.1) <sup>a</sup>  | 0.07 (0.05–0.1)    | 0.1 (0.06–0.15)                | 0.1 (0.06–0.15) <sup>c</sup>  |
| <b>Basophils, ×10<sup>9</sup> per</b> |                   |                               |                               |                    |                                |                               |
| <b>L</b>                              | 0.01 (0–0.01)     | 0.02 (0.01–0.03) <sup>a</sup> | 0.01 (0.01–0.03) <sup>a</sup> | 0.01 (0–0.01)      | 0.01 (0–0.02)                  | 0.01 (0–0.01) <sup>c</sup>    |
| <b>PCT, %</b>                         | 0.21 (0.19–0.24)  | 0.21 (0.18–0.24)              | 0.22 (0.17–0.26)              | 0.2 (0.18–0.22)    | 0.21 (0.19–0.23)               | 0.2 (0.18–0.23)               |
| <b>AST, U/L</b>                       | 23 (20.5–26)      | 26 (18–34) <sup>a</sup>       | 26 (20–45.5) <sup>a</sup>     | 25 (22–31.25)      | 20.5 (18–24)                   | 23 (20–28)                    |
| <b>ALT, U/L</b>                       | 22 (16.5–31.5)    | 28 (22–39) <sup>a</sup>       | 30 (17–48.5) <sup>a</sup>     | 26 (16.75–59.5)    | 19.5 (14–28.5)                 | 22 (18–43)                    |
| <b>AST/ALT</b>                        | 1 (0.76–1.28)     | 0.85 (0.56–1.12)              | 1.07 (0.7–1.25)               | 1 (0.55–1.4)       | 1.07 (0.73–1.19)               | 0.95 (0.69–1.2)               |
| <b>ALP, U/L</b>                       | 68 (56–86.5)      | 50 (42–63) <sup>a</sup>       | 52 (43–70.5) <sup>a</sup>     | 54.5 (48.75–76.75) | 57.5 (47.5–68.75) <sup>a</sup> | 63 (49.5–72)                  |
| <b>γ-GT, U/L</b>                      | 20 (16–26)        | 23 (14–36)                    | 25 (16.5–42)                  | 24 (16.75–66.5)    | 19 (12–24)                     | 19 (13.5–29.5)                |
| <b>TBIL, μmol/L</b>                   | 13.2 (10.75–18.9) | 9.5 (7.4–10.3) <sup>a</sup>   | 8.8 (7.5–11.45) <sup>a</sup>  | 14.95 (13.1–18.25) | 12.1 (9.6–15) <sup>b</sup>     | 13 (10.85–15.15) <sup>c</sup> |
| <b>DBIL, μmol/L</b>                   | 3 (2.3–4.8)       | 2.5 (1.8–2.9)                 | 3 (2.1–3.5)                   | 3.55 (2.8–4.68)    | 3.2 (2.63–4.28) <sup>b</sup>   | 3.1 (2.4–4.25)                |
| <b>IBIL, μmol/L</b>                   | 10 (8.3–14.05)    | 6.9 (5.9–8.2) <sup>a</sup>    | 6.1 (5.2–7.6) <sup>a</sup>    | 11.7 (10.05–13.98) | 8.8 (6.93–11.33)               | 9.7 (8.1–12.1) <sup>c</sup>   |

|                               |                      |                                    |                                    |                                  |                                  |                                   |
|-------------------------------|----------------------|------------------------------------|------------------------------------|----------------------------------|----------------------------------|-----------------------------------|
| <b>Total protein, g/L</b>     | 77 (73.45–79.85)     | 66.8 (63.8–70.8) <sup>a</sup>      | 64.6 (59.1–69.3) <sup>a</sup>      | 78.35 (76.78–81.8)               | 76.45 (73.33–79.08) <sup>b</sup> | 76.8 (73.8–79.45) <sup>c</sup>    |
| <b>Albumin, g/L</b>           | 47.7 (46.35–48.3)    | 40.1 (35.7–42.4) <sup>a</sup>      | 33.9 (30.3–39.05) <sup>a</sup>     | 47.9 (45.88–48.98)               | 46.8 (44.45–49.38) <sup>b</sup>  | 46.9 (45.6–50) <sup>c</sup>       |
| <b>Globin, g/L</b>            | 29.4 (26.7–31.65)    | 29.1 (26.3–32.8)                   | 29.15 (25.6–31.53)                 | 30.9 (29.58–33.78) <sup>a</sup>  | 29.35 (26.85–31.78) <sup>b</sup> | 29.6 (27.9–31.55)                 |
| <b>Albumin/globin</b>         | 1.6 (1.5–1.75)       | 1.3 (1–1.5) <sup>a</sup>           | 1.35 (1.13–1.48) <sup>a</sup>      | 1.5 (1.4–1.6)                    | 1.6 (1.43–1.78) <sup>b</sup>     | 1.6 (1.5–1.7) <sup>c</sup>        |
| <b>BUN, mmol/L</b>            | 5.39 (5.01–5.81)     | 3.69 (3.15–4.9) <sup>a</sup>       | 4.03 (3.11–5.08) <sup>a</sup>      | 4.68 (4.19–5.42) <sup>a</sup>    | 4.34 (3.9–5.29) <sup>a</sup>     | 4.77 (4.05–5.73)                  |
| <b>Creatinine, μmol/L</b>     | 71.8 (63.8–78.85)    | 60.2 (52.18–71.55) <sup>a</sup>    | 62.65 (50.58–81.6)                 | 74.8 (59.1–82.13)                | 61.95 (55.9–77.33)               | 61.4 (56–74.8)                    |
| <b>UA, μmol/L</b>             | 349.4 (283.75–405.3) | 264.3 (202.95–312.23) <sup>a</sup> | 283.35 (205.8–341.58) <sup>a</sup> | 378.55 (286.23–457.68)           | 298.35 (247.28–400.18)           | 368.1 (306.75–429.9) <sup>c</sup> |
| <b>Glucose, mmol/L</b>        | 5.15 (5–5.28)        | 5.6 (5.05–6.65) <sup>a</sup>       | 5.3 (5.03–5.9)                     | 5.27 (5.05–5.64)                 | 5.11 (4.91–5.49)                 | 5.36 (5–5.61) <sup>c</sup>        |
| <b>Mg, mmol/L</b>             | 0.89 (0.88–0.94)     | 0.85 (0.78–0.89) <sup>a</sup>      | 0.84 (0.79–0.9) <sup>a</sup>       | 0.92 (0.89–0.95)                 | 0.87 (0.83–0.89) <sup>a</sup>    | 0.86 (0.83–0.88) <sup>a</sup>     |
| <b>Ca, mmol/L</b>             | 0.92 (0.75–1.05)     | 1.04 (0.94–1.29) <sup>a</sup>      | 1.2 (1.04–1.37) <sup>a</sup>       | 0.99 (0.88–1.08)                 | 0.99 (0.93–1.09)                 | 0.98 (0.86–1.11) <sup>c</sup>     |
| <b>P, mmol/L</b>              | 2.18 (2.15–2.27)     | 2.04 (1.92–2.15) <sup>a</sup>      | 2.06 (1.98–2.18) <sup>a</sup>      | 2.2 (2.16–2.3)                   | 2.23 (2.16–2.31) <sup>b</sup>    | 2.2 (2.16–2.26) <sup>ac</sup>     |
| <b>Creatine kinase, U/L</b>   | 98 (82.5–151.5)      | 73 (62–106) <sup>a</sup>           | 63 (44–117.5) <sup>a</sup>         | 105 (82.25–145.75)               | 92 (71–118)                      | 108 (74–121.5)                    |
| <b>LDH, U/L</b>               | 188 (156–218)        | 179 (146–211)                      | 230 (184.5–322.5) <sup>ad</sup>    | 185.5 (167.75–205.75)            | 176.5 (155.5–189.25)             | 177 (165–201.5) <sup>c</sup>      |
| <b>CK-MB activity, U/L</b>    | 10 (8–13)            | 11 (8–16)                          | 10 (8–12)                          | 9.5 (8–12)                       | 12 (9–15)                        | 13 (11–14.5)                      |
| <b>α-HBDH, U/L</b>            | 141 (128–163)        | 171 (124–283) <sup>a</sup>         | 155 (122–175) <sup>a</sup>         | 135 (102.75–140.25) <sup>a</sup> | 136 (122.5–167.5)                | 145 (126.5–157)                   |
| <b>CO<sub>2</sub>, mmol/L</b> | 27.6 (26.3–28.6)     | 27.2 (23.15–30.93)                 | 26.8 (22.4–28.8)                   | 24.35 (21.4–25.05) <sup>a</sup>  | 24.1 (22.73–25.9) <sup>ab</sup>  | 25.2 (22.9–27.3) <sup>a</sup>     |
| <b>PT, s</b>                  | 12.2 (11.6–12.8)     | 12.6 (12.3–13.5) <sup>a</sup>      | 12.9 (12.5–13.2) <sup>a</sup>      | 12.1 (11.55–12.38)               | 12.3 (11.8–12.95)                | 11.7 (11.5–12.15) <sup>ac</sup>   |
| <b>INR</b>                    | 0.92 (0.86–0.98)     | 0.96 (0.93–1.05) <sup>a</sup>      | 0.99 (0.95–1.03) <sup>a</sup>      | 0.91 (0.86–0.94)                 | 0.93 (0.88–1)                    | 0.87 (0.85–0.92) <sup>ac</sup>    |
| <b>APTT, s</b>                | 38 (36.3–40.6)       | 35.7 (33.7–40.5)                   | 35.3 (32.15–38.25) <sup>a</sup>    | 36.95 (34.78–39.23)              | 36.55 (33.68–39.35)              | 35.4 (33.55–37.45) <sup>a</sup>   |
| <b>FIB, g/L</b>               | 3.08 (2.82–3.22)     | 3.68 (3.08–4.4) <sup>a</sup>       | 3.48 (3.14–4.34) <sup>a</sup>      | 3.02 (2.72–3.3)                  | 2.99 (2.73–3.33) <sup>b</sup>    | 2.98 (2.82–3.22) <sup>c</sup>     |
| <b>TT, s</b>                  | 16.2 (15.9–16.6)     | 15.1 (14.6–16.5) <sup>a</sup>      | 15.3 (14.95–15.65) <sup>a</sup>    | 15.9 (15.35–16.8)                | 16.15 (15.53–16.9) <sup>b</sup>  | 16.1 (15.65–16.45)                |

**Abbreviation:**

ALP, alkaline phosphatase; ALT, alanine aminotransferase; APTT, activated partial thromboplastin time; AST, aspartate aminotransferase; BUN, blood urea nitrogen; Ca, calcium; CK-MB, creatine kinase-myocardial band; CRP, C-reactive protein; DBIL, direct bilirubin; FIB, fibrinogen; HCs, healthy controls; IBIL, indirect bilirubin; INR, international normalized ratio; LDH, lactate dehydrogenase; M, moderate; MCH, mean corpuscular hemoglobin; MCHC, mean corpuscular hemoglobin concentration; MCV, mean corpuscular volume; Mg, magnesium; P, phosphorus; PCT, plateletcrit; PDW, platelet distribution width; PT, prothrombin time; RAs, recovered asymptomatic patients; RBC, red blood cell; RDW, red blood cell volume distribution width; RMs, recovered moderate patients; RSs, recovered critical and severe patients; S, critical and severe; TBIL, total bilirubin; TT, thrombin time; UA, urine acid; WBC, white blood cell;  $\alpha$ -HBDH,  $\alpha$ -hydroxybutyrate dehydrogenase;  $\gamma$ -GT,  $\gamma$ -glutamyl transpeptidase;

Data were shown as median (interquartile range, IQR) or n (%).

Comparisons were made regarding continuous variables between two groups using the *t*-test for variables with a normal distribution and the Wilcoxon rank-sum test for variables with a non-normal distribution.

<sup>a</sup> $p < 0.05$ , HC vs. M, S, RA, RM, and RS; <sup>b</sup> $p < 0.05$ , comparison between M and RM, <sup>c</sup> $p < 0.05$ ; comparison between S and RS.

**Table S2. Particle concentration and size (mode and mean) of plasma-derived sEVs**

| Groups         | Particle concentration (10 <sup>10</sup> ) | Mean size (nm) | Mode size (nm) | Size range D10 and D90 (nm) |
|----------------|--------------------------------------------|----------------|----------------|-----------------------------|
| HC sEVs        | 18.97±0.03                                 | 99.53±1.12     | 65.30±3.42     | 60.33–152.07                |
| RA sEVs        | 25.00±5.30                                 | 97.20±3.22     | 63.03±0.37     | 58.80–142.60                |
| RM sEVs        | 20.63±0.68                                 | 93.50±0.91     | 64.07±1.14     | 58.30–138.57                |
| RS sEVs        | 14.97±1.86                                 | 98.80±2.23     | 72.40±2.16     | 60.33–168.73                |
| <b>p-value</b> | <b>0.171</b>                               | <b>0.115</b>   | <b>0.138</b>   |                             |

**Abbreviation:** HCs, healthy controls; RAs, recovered asymptomatic patients; RMs, recovered moderate patients; RSs, recovered severe and critical patients; sEVs, small extracellular vesicles.

**Table S3. The size distribution of sEVs in RAs, RMs, RSs, and HCs**

| Proportion (%) | 0-50 nm  | 50-100 nm    | 100-150 nm   | 150-200 nm   | 200-250 nm   | 250-300 nm |
|----------------|----------|--------------|--------------|--------------|--------------|------------|
| HC sEVs        | 0        | 0.7153       | 0.2126       | 0.0408       | 0.0312       | 0          |
| RA sEVs        | 0        | 0.6910       | 0.2279       | 0.0432       | 0.0380       | 0          |
| RM sEVs        | 0        | 0.7010       | 0.2397       | 0.0379       | 0.0213       | 0          |
| RS sEVs        | 0        | 0.7028       | 0.2133       | 0.0473       | 0.0366       | 0          |
| <b>p-value</b> | <b>1</b> | <b>0.319</b> | <b>0.053</b> | <b>0.282</b> | <b>0.069</b> | <b>1</b>   |

**Abbreviation:** HCs, healthy controls; RAs, recovered asymptomatic patients; RMs, recovered moderate patients; RSs, recovered severe and critical patients; sEVs, small extracellular vesicles.

**Table S4. The detected 508 lipids**

| No. | Lipid Name   | Ionization Mode | Class |
|-----|--------------|-----------------|-------|
| 1   | FFA_12_0     | Negative        | FFA   |
| 2   | FFA_12_1     | Negative        | FFA   |
| 3   | FFA_14_0     | Negative        | FFA   |
| 4   | FFA_14_1     | Negative        | FFA   |
| 5   | FFA_16_0     | Negative        | FFA   |
| 6   | FFA_16_1     | Negative        | FFA   |
| 7   | FFA_16_2     | Negative        | FFA   |
| 8   | FFA_17_0     | Negative        | FFA   |
| 9   | FFA_17_1     | Negative        | FFA   |
| 10  | FFA_18_0     | Negative        | FFA   |
| 11  | FFA_18_1     | Negative        | FFA   |
| 12  | FFA_18_2     | Negative        | FFA   |
| 13  | FFA_18_3     | Negative        | FFA   |
| 14  | FFA_18_4     | Negative        | FFA   |
| 15  | FFA_20_0     | Negative        | FFA   |
| 16  | FFA_20_1     | Negative        | FFA   |
| 17  | FFA_20_2     | Negative        | FFA   |
| 18  | FFA_20_3     | Negative        | FFA   |
| 19  | FFA_20_4     | Negative        | FFA   |
| 20  | FFA_20_5     | Negative        | FFA   |
| 21  | FFA_22_0     | Negative        | FFA   |
| 22  | FFA_22_1     | Negative        | FFA   |
| 23  | FFA_22_2     | Negative        | FFA   |
| 24  | FFA_22_3     | Negative        | FFA   |
| 25  | FFA_22_4     | Negative        | FFA   |
| 26  | FFA_22_5     | Negative        | FFA   |
| 27  | FFA_22_6     | Negative        | FFA   |
| 28  | LPA16_0      | Negative        | LPA   |
| 29  | LPA16_1      | Negative        | LPA   |
| 30  | LPA18_0      | Negative        | LPA   |
| 31  | LPA18_1      | Negative        | LPA   |
| 32  | LPA18_2      | Negative        | LPA   |
| 33  | LPI16_0      | Negative        | LPI   |
| 34  | LPI16_1      | Negative        | LPI   |
| 35  | LPI18_0      | Negative        | LPI   |
| 36  | LPI18_1      | Negative        | LPI   |
| 37  | LPI18_2      | Negative        | LPI   |
| 38  | LPI20_3      | Negative        | LPI   |
| 39  | PA_14_0-16_1 | Negative        | PA    |
| 40  | PA_16_0-16_0 | Negative        | PA    |
| 41  | PA_16_0-16_1 | Negative        | PA    |
| 42  | PA_16_0-18_0 | Negative        | PA    |

|    |              |          |    |
|----|--------------|----------|----|
| 43 | PA_16_0-18_1 | Negative | PA |
| 44 | PA_16_0-18_2 | Negative | PA |
| 45 | PA_16_0-20_3 | Negative | PA |
| 46 | PA_16_1-16_1 | Negative | PA |
| 47 | PA_16_1-18_0 | Negative | PA |
| 48 | PA_16_1-18_1 | Negative | PA |
| 49 | PA_16_1-18_2 | Negative | PA |
| 50 | PA_18_0-18_0 | Negative | PA |
| 51 | PA_18_0-18_1 | Negative | PA |
| 52 | PA_18_0-18_2 | Negative | PA |
| 53 | PA_18_0-18_3 | Negative | PA |
| 54 | PA_18_0-20_3 | Negative | PA |
| 55 | PA_18_1-18_1 | Negative | PA |
| 56 | PA_18_1-18_2 | Negative | PA |
| 57 | PA_18_1-20_3 | Negative | PA |
| 58 | PA22_0-22_6  | Negative | PA |
| 59 | PC12_0-16_0  | Negative | PC |
| 60 | PC14_0-16_0  | Negative | PC |
| 61 | PC14_0-16_1  | Negative | PC |
| 62 | PC14_0-22_4  | Negative | PC |
| 63 | PC14_1-16_0  | Negative | PC |
| 64 | PC14_1-16_1  | Negative | PC |
| 65 | PC16_0-16_0  | Negative | PC |
| 66 | PC16_0-16_1  | Negative | PC |
| 67 | PC16_0-18_0  | Negative | PC |
| 68 | PC16_0-18_1  | Negative | PC |
| 69 | PC16_0-18_2  | Negative | PC |
| 70 | PC16_0-18_3  | Negative | PC |
| 71 | PC16_0-20_0  | Negative | PC |
| 72 | PC16_0-20_1  | Negative | PC |
| 73 | PC16_0-20_2  | Negative | PC |
| 74 | PC16_0-20_3  | Negative | PC |
| 75 | PC16_0-20_4  | Negative | PC |
| 76 | PC16_0-20_5  | Negative | PC |
| 77 | PC16_0-22_2  | Negative | PC |
| 78 | PC16_0-22_3  | Negative | PC |
| 79 | PC16_0-22_4  | Negative | PC |
| 80 | PC16_0-22_5  | Negative | PC |
| 81 | PC16_0-22_6  | Negative | PC |
| 82 | PC16_1-16_1  | Negative | PC |
| 83 | PC16_1-18_0  | Negative | PC |
| 84 | PC16_1-18_1  | Negative | PC |
| 85 | PC16_1-18_2  | Negative | PC |
| 86 | PC16_1-18_3  | Negative | PC |

|     |              |          |    |
|-----|--------------|----------|----|
| 87  | PC16_1-20_0  | Negative | PC |
| 88  | PC16_1-20_1  | Negative | PC |
| 89  | PC16_1-20_2  | Negative | PC |
| 90  | PC16_1-20_3  | Negative | PC |
| 91  | PC16_1-20_4  | Negative | PC |
| 92  | PC16_1-20_5  | Negative | PC |
| 93  | PC18_0-18_0  | Negative | PC |
| 94  | PC18_0-18_1  | Negative | PC |
| 95  | PC18_0-18_2  | Negative | PC |
| 96  | PC18_0-18_3  | Negative | PC |
| 97  | PC18_0-20_2  | Negative | PC |
| 98  | PC18_0-20_3  | Negative | PC |
| 99  | PC18_0-20_5  | Negative | PC |
| 100 | PC18_0-22_4  | Negative | PC |
| 101 | PC18_0-22_5  | Negative | PC |
| 102 | PC18_1-18_1  | Negative | PC |
| 103 | PC18_1-18_2  | Negative | PC |
| 104 | PC18_1-18_3  | Negative | PC |
| 105 | PC18_1-20_0  | Negative | PC |
| 106 | PC18_1-20_1  | Negative | PC |
| 107 | PC18_1-20_2  | Negative | PC |
| 108 | PC18_1-20_3  | Negative | PC |
| 109 | PC18_1-22_0  | Negative | PC |
| 110 | PC18_2-18_2  | Negative | PC |
| 111 | PC18_2-20_0  | Negative | PC |
| 112 | PC18_2-20_2  | Negative | PC |
| 113 | PC18_2-20_3  | Negative | PC |
| 114 | PC18_2-20_4  | Negative | PC |
| 115 | PC20_0-22_0  | Negative | PC |
| 116 | PC20_0-22_1  | Negative | PC |
| 117 | PC20_1-22_1  | Negative | PC |
| 118 | PC20_1-22_2  | Negative | PC |
| 119 | PC20_2-22_0  | Negative | PC |
| 120 | PC20_2-22_1  | Negative | PC |
| 121 | PC20_3-22_1  | Negative | PC |
| 122 | PC22_3-22_6  | Negative | PC |
| 123 | PE14_0-22_5  | Negative | PE |
| 124 | PE_14_1-18_0 | Negative | PE |
| 125 | PE_14_1-18_1 | Negative | PE |
| 126 | PE_16_0-16_0 | Negative | PE |
| 127 | PE_16_0-16_1 | Negative | PE |
| 128 | PE_16_0-18_0 | Negative | PE |
| 129 | PE_16_0-18_1 | Negative | PE |
| 130 | PE_16_0-18_2 | Negative | PE |

|     |              |          |    |
|-----|--------------|----------|----|
| 131 | PE16_0-20_2  | Negative | PE |
| 132 | PE_16_0-20_3 | Negative | PE |
| 133 | PE16_0-20_4  | Negative | PE |
| 134 | PE16_0-20_5  | Negative | PE |
| 135 | PE16_0-22_4  | Negative | PE |
| 136 | PE16_0-22_5  | Negative | PE |
| 137 | PE16_0-22_6  | Negative | PE |
| 138 | PE_16_1-16_1 | Negative | PE |
| 139 | PE_16_1-18_0 | Negative | PE |
| 140 | PE_16_1-18_1 | Negative | PE |
| 141 | PE_16_1-18_2 | Negative | PE |
| 142 | PE_18_0-18_0 | Negative | PE |
| 143 | PE_18_0-18_1 | Negative | PE |
| 144 | PE_18_0-18_2 | Negative | PE |
| 145 | PE_18_0-18_3 | Negative | PE |
| 146 | PE18_0-20_2  | Negative | PE |
| 147 | PE18_0-20_3  | Negative | PE |
| 148 | PE18_0-20_4  | Negative | PE |
| 149 | PE18_0-20_5  | Negative | PE |
| 150 | PE18_0-22_1  | Negative | PE |
| 151 | PE18_0-22_4  | Negative | PE |
| 152 | PE18_0-22_5  | Negative | PE |
| 153 | PE18_0-22_6  | Negative | PE |
| 154 | PE_18_1-18_1 | Negative | PE |
| 155 | PE_18_1-18_2 | Negative | PE |
| 156 | PE_18_1-18_3 | Negative | PE |
| 157 | PE_18_1-20_3 | Negative | PE |
| 158 | PE_18_1-20_4 | Negative | PE |
| 159 | PE_18_1-20_5 | Negative | PE |
| 160 | PE_18_2-18_2 | Negative | PE |
| 161 | PE18_2-18_3  | Negative | PE |
| 162 | PE18_2-20_2  | Negative | PE |
| 163 | PE_18_2-20_3 | Negative | PE |
| 164 | PE18_2-20_4  | Negative | PE |
| 165 | PE_18_3-22_5 | Negative | PE |
| 166 | PE20_0-22_6  | Negative | PE |
| 167 | PE20_2-20_4  | Negative | PE |
| 168 | PE20_4-20_4  | Negative | PE |
| 169 | PE_22_0-22_4 | Negative | PE |
| 170 | PE_22_1-22_3 | Negative | PE |
| 171 | PE_22_3-22_6 | Negative | PE |
| 172 | PG_14_0-16_0 | Negative | PG |
| 173 | PG_16_0-16_0 | Negative | PG |
| 174 | PG_16_0-16_1 | Negative | PG |



|     |              |          |    |
|-----|--------------|----------|----|
| 175 | PG_16_0-18_0 | Negative | PG |
| 176 | PG_16_0-18_1 | Negative | PG |
| 177 | PG_16_0-18_2 | Negative | PG |
| 178 | PG_16_0-20_2 | Negative | PG |
| 179 | PG_16_0-20_3 | Negative | PG |
| 180 | PG_16_1-16_1 | Negative | PG |
| 181 | PG_16_1-18_0 | Negative | PG |
| 182 | PG_16_1-18_1 | Negative | PG |
| 183 | PG_16_1-18_2 | Negative | PG |
| 184 | PG_18_0-18_0 | Negative | PG |
| 185 | PG_18_0-18_1 | Negative | PG |
| 186 | PG_18_0-18_2 | Negative | PG |
| 187 | PG_18_0-20_4 | Negative | PG |
| 188 | PG_18_1-18_1 | Negative | PG |
| 189 | PG_18_1-18_2 | Negative | PG |
| 190 | PG_18_1-18_3 | Negative | PG |
| 191 | PG_18_2-18_2 | Negative | PG |
| 192 | PI_14_0-18_0 | Negative | PI |
| 193 | PI_14_0-18_1 | Negative | PI |
| 194 | PI_16_0-16_0 | Negative | PI |
| 195 | PI_16_0-16_1 | Negative | PI |
| 196 | PI_16_0-18_0 | Negative | PI |
| 197 | PI_16_0-18_1 | Negative | PI |
| 198 | PI_16_0-18_2 | Negative | PI |
| 199 | PI_16_0-20_0 | Negative | PI |
| 200 | PI_16_0-20_1 | Negative | PI |
| 201 | PI_16_0-20_3 | Negative | PI |
| 202 | PI_16_0-20_4 | Negative | PI |
| 203 | PI_16_1-16_1 | Negative | PI |
| 204 | PI_16_1-18_0 | Negative | PI |
| 205 | PI_16_1-18_1 | Negative | PI |
| 206 | PI_16_1-18_2 | Negative | PI |
| 207 | PI_18_0-18_0 | Negative | PI |
| 208 | PI_18_0-18_1 | Negative | PI |
| 209 | PI_18_0-18_2 | Negative | PI |
| 210 | PI_18_0-18_3 | Negative | PI |
| 211 | PI_18_0-20_2 | Negative | PI |
| 212 | PI_18_0-20_3 | Negative | PI |
| 213 | PI_18_0-20_4 | Negative | PI |
| 214 | PI_18_0-20_5 | Negative | PI |
| 215 | PI_18_0-22_4 | Negative | PI |
| 216 | PI_18_1-18_1 | Negative | PI |
| 217 | PI_18_1-18_2 | Negative | PI |
| 218 | PI_18_1-18_3 | Negative | PI |

|     |                        |          |     |
|-----|------------------------|----------|-----|
| 219 | PI_18_1-20_3           | Negative | PI  |
| 220 | PI18_2-18_2            | Negative | PI  |
| 221 | PI18_2-20_1            | Negative | PI  |
| 222 | PI20_0-20_3            | Negative | PI  |
| 223 | PI20_0-20_4            | Negative | PI  |
| 224 | PS_16_0-16_0           | Negative | PS  |
| 225 | PS_16_0-16_1           | Negative | PS  |
| 226 | PS_16_0-18_0           | Negative | PS  |
| 227 | PS_16_0-18_1           | Negative | PS  |
| 228 | PS_16_0-18_2           | Negative | PS  |
| 229 | PS_16_0-20_3           | Negative | PS  |
| 230 | PS_16_1-16_1           | Negative | PS  |
| 231 | PS_16_1-18_0           | Negative | PS  |
| 232 | PS_16_1-18_1           | Negative | PS  |
| 233 | PS_16_1-18_2           | Negative | PS  |
| 234 | PS_18_0-18_0           | Negative | PS  |
| 235 | PS_18_0-18_1           | Negative | PS  |
| 236 | PS_18_0-18_2           | Negative | PS  |
| 237 | PS_18_1-18_1           | Negative | PS  |
| 238 | PS_18_1-18_2           | Negative | PS  |
| 239 | PS_18_3-18_3           | Negative | PS  |
| 240 | PS_20_3-20_3           | Negative | PS  |
| 241 | PS_22_4-22_5           | Negative | PS  |
| 242 | 15:0-18:1_(d7)_PA      | Negative | SIL |
| 243 | 15:0-18:1 (d7) PC      | Negative | SIL |
| 244 | 15:0-18:1_(d7)_PE      | Negative | SIL |
| 245 | 15:0-18:1_(d7)_PG      | Negative | SIL |
| 246 | 15:0-18:1_(d7)_PI      | Negative | SIL |
| 247 | 15:0-18:1_(d7)_PS      | Negative | SIL |
| 248 | 15:0-18:1 (d7) PCpos   | Negative | SIL |
| 249 | 15:0-18:1 (d7) DG      | Positive | SIL |
| 250 | 15:0-18:1 (d7)-15:0 TG | Positive | SIL |
| 251 | 18:1 (d7) Chol Ester   | Positive | SIL |
| 252 | 18:1 (d7) LPC          | Positive | SIL |
| 253 | 18:1 (d7) LPE          | Positive | SIL |
| 254 | 18:1 (d7) MG           | Positive | SIL |
| 255 | 18:1 (d9) SM           | Positive | SIL |
| 256 | Cholesterol (d7)       | Positive | SIL |
| 257 | CE 14_0                | Positive | CE  |
| 258 | CE 14_1                | Positive | CE  |
| 259 | CE 16_0                | Positive | CE  |
| 260 | CE 16_1                | Positive | CE  |
| 261 | CE 17_0                | Positive | CE  |
| 262 | CE 18_0                | Positive | CE  |

|     |                |          |     |
|-----|----------------|----------|-----|
| 263 | CE 18_2        | Positive | CE  |
| 264 | CE 20_0        | Positive | CE  |
| 265 | CE 20_2        | Positive | CE  |
| 266 | CE 22_0        | Positive | CE  |
| 267 | Cer d18_1-12_0 | Positive | Cer |
| 268 | Cer d18_1-14_0 | Positive | Cer |
| 269 | Cer d18_1-14_1 | Positive | Cer |
| 270 | Cer d18_1-16_0 | Positive | Cer |
| 271 | Cer d18_1-16_1 | Positive | Cer |
| 272 | Cer d18_1-17_0 | Positive | Cer |
| 273 | Cer d18_1-18_0 | Positive | Cer |
| 274 | Cer d18_1-18_1 | Positive | Cer |
| 275 | Cer d18_1-18_2 | Positive | Cer |
| 276 | Cer d18_1-18_3 | Positive | Cer |
| 277 | Cer d18_1-18_4 | Positive | Cer |
| 278 | Cer d18_1-20_0 | Positive | Cer |
| 279 | Cer d18_1-20_1 | Positive | Cer |
| 280 | Cer d18_1-20_2 | Positive | Cer |
| 281 | Cer d18_1-20_3 | Positive | Cer |
| 282 | Cer d18_1-20_4 | Positive | Cer |
| 283 | Cer d18_1-20_5 | Positive | Cer |
| 284 | Cer d18_1-22_0 | Positive | Cer |
| 285 | Cer d18_1-22_1 | Positive | Cer |
| 286 | Cer d18_1-22_2 | Positive | Cer |
| 287 | Cer d18_1-22_3 | Positive | Cer |
| 288 | Cer d18_1-22_4 | Positive | Cer |
| 289 | Cer d18_1-22_5 | Positive | Cer |
| 290 | Cer d18_1-22_6 | Positive | Cer |
| 291 | DAG12_0-16_0   | Positive | DG  |
| 292 | DAG12_0-18_2   | Positive | DG  |
| 293 | DAG14_0-16_0   | Positive | DG  |
| 294 | DAG14_0-18_0   | Positive | DG  |
| 295 | DAG14_0-18_1   | Positive | DG  |
| 296 | DAG14_0-18_2   | Positive | DG  |
| 297 | DAG14_1-18_1   | Positive | DG  |
| 298 | DAG14_1-22_4   | Positive | DG  |
| 299 | DAG14_1-22_5   | Positive | DG  |
| 300 | DAG14_1-22_6   | Positive | DG  |
| 301 | DAG16_0-16_0   | Positive | DG  |
| 302 | DAG16_0-16_1   | Positive | DG  |
| 303 | DAG16_0-18_0   | Positive | DG  |
| 304 | DAG16_0-18_1   | Positive | DG  |
| 305 | DAG16_0-18_2   | Positive | DG  |
| 306 | DAG16_0-20_1   | Positive | DG  |

|     |                  |          |        |
|-----|------------------|----------|--------|
| 307 | DAG16_0-20_4     | Positive | DG     |
| 308 | DAG16_1-16_1     | Positive | DG     |
| 309 | DAG16_1-18_0     | Positive | DG     |
| 310 | DAG16_1-18_1     | Positive | DG     |
| 311 | DAG16_1-18_2     | Positive | DG     |
| 312 | DAG18_0-18_0     | Positive | DG     |
| 313 | DAG18_0-18_1     | Positive | DG     |
| 314 | DAG18_0-18_2     | Positive | DG     |
| 315 | DAG18_0-20_0     | Positive | DG     |
| 316 | DAG18_0-20_1     | Positive | DG     |
| 317 | DAG18_1-18_1     | Positive | DG     |
| 318 | DAG18_1-18_2     | Positive | DG     |
| 319 | DAG18_1-18_3     | Positive | DG     |
| 320 | DAG18_1-20_0     | Positive | DG     |
| 321 | DAG18_1-20_1     | Positive | DG     |
| 322 | DAG18_2-18_2     | Positive | DG     |
| 323 | DAG18_2-20_0     | Positive | DG     |
| 324 | DAG18_2-20_1     | Positive | DG     |
| 325 | DAG18_2-20_2     | Positive | DG     |
| 326 | DAG20_0-22_1     | Positive | DG     |
| 327 | DAG20_0-22_6     | Positive | DG     |
| 328 | DAG22_0-22_1     | Positive | DG     |
| 329 | DAG22_0-22_2     | Positive | DG     |
| 330 | DAG22_2-22_3     | Positive | DG     |
| 331 | HexCerd18_1-12_0 | Positive | HexCer |
| 332 | HexCerd18_1-14_0 | Positive | HexCer |
| 333 | HexCerd18_1-14_1 | Positive | HexCer |
| 334 | HexCerd18_1-16_0 | Positive | HexCer |
| 335 | HexCerd18_1-16_1 | Positive | HexCer |
| 336 | HexCerd18_1-18_0 | Positive | HexCer |
| 337 | HexCerd18_1-18_1 | Positive | HexCer |
| 338 | HexCerd18_1-18_2 | Positive | HexCer |
| 339 | HexCerd18_1-18_3 | Positive | HexCer |
| 340 | HexCerd18_1-18_4 | Positive | HexCer |
| 341 | HexCerd18_1-20_0 | Positive | HexCer |
| 342 | HexCerd18_1-20_1 | Positive | HexCer |
| 343 | HexCerd18_1-20_2 | Positive | HexCer |
| 344 | HexCerd18_1-20_3 | Positive | HexCer |
| 345 | HexCerd18_1-20_4 | Positive | HexCer |
| 346 | HexCerd18_1-20_5 | Positive | HexCer |
| 347 | HexCerd18_1-22_0 | Positive | HexCer |
| 348 | HexCerd18_1-22_1 | Positive | HexCer |
| 349 | HexCerd18_1-22_2 | Positive | HexCer |
| 350 | HexCerd18_1-22_3 | Positive | HexCer |

|     |                  |          |        |
|-----|------------------|----------|--------|
| 351 | HexCerd18_1-22_4 | Positive | HexCer |
| 352 | HexCerd18_1-22_5 | Positive | HexCer |
| 353 | HexCerd18_1-22_6 | Positive | HexCer |
| 354 | LPC12_0          | Positive | LPC    |
| 355 | LPC14_1          | Positive | LPC    |
| 356 | LPC15_0          | Positive | LPC    |
| 357 | LPC16_0          | Positive | LPC    |
| 358 | LPC16_1          | Positive | LPC    |
| 359 | LPC18_0          | Positive | LPC    |
| 360 | LPC18_1          | Positive | LPC    |
| 361 | LPC18_2          | Positive | LPC    |
| 362 | LPC18_3          | Positive | LPC    |
| 363 | LPC18_4          | Positive | LPC    |
| 364 | LPC20_0          | Positive | LPC    |
| 365 | LPC20_3          | Positive | LPC    |
| 366 | LPC20_4          | Positive | LPC    |
| 367 | LPC20_5          | Positive | LPC    |
| 368 | LPC22_1          | Positive | LPC    |
| 369 | LPC22_4          | Positive | LPC    |
| 370 | LPC22_6          | Positive | LPC    |
| 371 | LPC24_0          | Positive | LPC    |
| 372 | LPCO- 16_0       | Positive | LPC    |
| 373 | LPCO- 18_0       | Positive | LPC    |
| 374 | LPCP-18_1        | Positive | LPC    |
| 375 | LPCP-20_0        | Positive | LPC    |
| 376 | LPE12_0          | Positive | LPE    |
| 377 | LPE14_0          | Positive | LPE    |
| 378 | LPE14_1          | Positive | LPE    |
| 379 | LPE16_0          | Positive | LPE    |
| 380 | LPE16_1          | Positive | LPE    |
| 381 | LPE17_1          | Positive | LPE    |
| 382 | LPE18_0          | Positive | LPE    |
| 383 | LPE18_1          | Positive | LPE    |
| 384 | LPE18_2          | Positive | LPE    |
| 385 | LPE18_3          | Positive | LPE    |
| 386 | LPE18_4          | Positive | LPE    |
| 387 | LPE20_0          | Positive | LPE    |
| 388 | LPE20_1          | Positive | LPE    |
| 389 | LPE20_2          | Positive | LPE    |
| 390 | LPE20_3          | Positive | LPE    |
| 391 | LPE20_4          | Positive | LPE    |
| 392 | LPE20_5          | Positive | LPE    |
| 393 | LPE22_0          | Positive | LPE    |
| 394 | LPE22_1          | Positive | LPE    |

|     |              |          |     |
|-----|--------------|----------|-----|
| 395 | LPE22_2      | Positive | LPE |
| 396 | LPE22_3      | Positive | LPE |
| 397 | LPE22_4      | Positive | LPE |
| 398 | LPE22_5      | Positive | LPE |
| 399 | LPE22_6      | Positive | LPE |
| 400 | MAG16_0      | Positive | MAG |
| 401 | MAG16_1      | Positive | MAG |
| 402 | MAG18_0      | Positive | MAG |
| 403 | MAG18_1      | Positive | MAG |
| 404 | MAG18_2      | Positive | MAG |
| 405 | MAG20_4      | Positive | MAG |
| 406 | MAG22_5      | Positive | MAG |
| 407 | PC16_0e-16_0 | Positive | PC  |
| 408 | PC16_0e-16_1 | Positive | PC  |
| 409 | PC16_0e-18_0 | Positive | PC  |
| 410 | PC16_0e-18_1 | Positive | PC  |
| 411 | PC16_0e-18_2 | Positive | PC  |
| 412 | PC16_0e-18_3 | Positive | PC  |
| 413 | PC16_0e-20_1 | Positive | PC  |
| 414 | PC16_0e-20_2 | Positive | PC  |
| 415 | PC16_0e-20_4 | Positive | PC  |
| 416 | PC16_0e-22_5 | Positive | PC  |
| 417 | PC16_0e-22_6 | Positive | PC  |
| 418 | PC16_0p-16_0 | Positive | PC  |
| 419 | PC16_0p-16_1 | Positive | PC  |
| 420 | PC16_0p-18_0 | Positive | PC  |
| 421 | PC16_0p-18_1 | Positive | PC  |
| 422 | PC16_0p-18_2 | Positive | PC  |
| 423 | PC16_0p-18_3 | Positive | PC  |
| 424 | PC16_0p-20_0 | Positive | PC  |
| 425 | PC16_0p-20_1 | Positive | PC  |
| 426 | PC16_0p-20_2 | Positive | PC  |
| 427 | PC16_0p-20_4 | Positive | PC  |
| 428 | PC16_0p-22_6 | Positive | PC  |
| 429 | PC18_0e-16_0 | Positive | PC  |
| 430 | PC18_0e-16_1 | Positive | PC  |
| 431 | PC18_0e-18_0 | Positive | PC  |
| 432 | PC18_0e-18_1 | Positive | PC  |
| 433 | PC18_0e-18_2 | Positive | PC  |
| 434 | PC18_0e-18_3 | Positive | PC  |
| 435 | PC18_0e-20_4 | Positive | PC  |
| 436 | PC18_0p-14_0 | Positive | PC  |
| 437 | PC18_0p-14_1 | Positive | PC  |
| 438 | PC18_0p-16_0 | Positive | PC  |

|     |              |          |    |
|-----|--------------|----------|----|
| 439 | PC18_0p-16_1 | Positive | PC |
| 440 | PC18_0p-18_0 | Positive | PC |
| 441 | PC18_0p-18_1 | Positive | PC |
| 442 | PC18_0p-18_2 | Positive | PC |
| 443 | PC18_0p-18_3 | Positive | PC |
| 444 | PC18_1e-16_0 | Positive | PC |
| 445 | PC18_1e-16_1 | Positive | PC |
| 446 | PC18_1e-18_0 | Positive | PC |
| 447 | PC18_1e-18_1 | Positive | PC |
| 448 | PC18_1e-18_2 | Positive | PC |
| 449 | PC18_1e-18_3 | Positive | PC |
| 450 | PC18_1e-20_4 | Positive | PC |
| 451 | PC18_2e-12_0 | Positive | PC |
| 452 | PC18_2e-16_0 | Positive | PC |
| 453 | PC18_2e-16_1 | Positive | PC |
| 454 | PC18_2e-18_0 | Positive | PC |
| 455 | PC18_2e-18_1 | Positive | PC |
| 456 | PC18_2e-18_2 | Positive | PC |
| 457 | PC18_2e-18_3 | Positive | PC |
| 458 | PC18_2p-16_1 | Positive | PC |
| 459 | PC18_2p-18_0 | Positive | PC |
| 460 | PC18_2p-18_1 | Positive | PC |
| 461 | PC18_2p-18_2 | Positive | PC |
| 462 | PC18_2p-20_3 | Positive | PC |
| 463 | PC18_2p-20_4 | Positive | PC |
| 464 | PC18_2p-20_5 | Positive | PC |
| 465 | SMd18_1-12_0 | Positive | SM |
| 466 | SMd18_1-14_0 | Positive | SM |
| 467 | SMd18_1-14_1 | Positive | SM |
| 468 | SMd18_1-16_0 | Positive | SM |
| 469 | SMd18_1-16_1 | Positive | SM |
| 470 | SMd18_1-17_0 | Positive | SM |
| 471 | SMd18_1-18_0 | Positive | SM |
| 472 | SMd18_1-18_1 | Positive | SM |
| 473 | SMd18_1-18_2 | Positive | SM |
| 474 | SMd18_1-18_3 | Positive | SM |
| 475 | SMd18_1-18_4 | Positive | SM |
| 476 | SMd18_1-20_0 | Positive | SM |
| 477 | SMd18_1-20_1 | Positive | SM |
| 478 | SMd18_1-20_2 | Positive | SM |
| 479 | SMd18_1-20_3 | Positive | SM |
| 480 | SMd18_1-20_4 | Positive | SM |
| 481 | SMd18_1-20_5 | Positive | SM |
| 482 | SMd18_1-22_0 | Positive | SM |

|     |              |          |    |
|-----|--------------|----------|----|
| 483 | SMd18_1-22_1 | Positive | SM |
| 484 | SMd18_1-22_2 | Positive | SM |
| 485 | SMd18_1-22_3 | Positive | SM |
| 486 | SMd18_1-22_4 | Positive | SM |
| 487 | SMd18_1-22_5 | Positive | SM |
| 488 | SMd18_1-22_6 | Positive | SM |
| 489 | TAG46_2      | Positive | TG |
| 490 | TAG48_0      | Positive | TG |
| 491 | TAG48_1      | Positive | TG |
| 492 | TAG48_2      | Positive | TG |
| 493 | TAG50_0      | Positiv  | TG |
| 494 | TAG50_1      | Positive | TG |
| 495 | TAG50_2      | Positive | TG |
| 496 | TAG50_3      | Positive | TG |
| 497 | TAG50_4      | Positive | TG |
| 498 | TAG52_2      | Positive | TG |
| 499 | TAG52_3      | Positive | TG |
| 500 | TAG52_4      | Positive | TG |
| 501 | TAG52_5      | Positive | TG |
| 502 | TAG52_6      | Positive | TG |
| 503 | TAG54_1      | Positive | TG |
| 504 | TAG54_2      | Positive | TG |
| 505 | TAG54_3      | Positive | TG |
| 506 | TAG54_4      | Positive | TG |
| 507 | TAG54_5      | Positive | TG |
| 508 | TAG54_6      | Positiv  | TG |

---

**Abbreviation:**

CE, Cholesteryl ester; Cer, Ceramide; DAG, Diacylglycerol; FFA, free fatty acid; HexCer, Hexosylceramide; LPA, lysoPhosphatidic acid; LPC, lysoPhosphatidylcholine; LPE, lysoPhosphatidylethanolamine; MAG, Monoacylglycerol; PA, phosphatidic acid; PC, phosphatidylcholine; PE, phosphatidylethanolamine; PG, Phosphatidylglycerol; SM, sphingomyelin; TAG, triacylglycerol.



**Table S6. Differential lipids**

| Lipids             | RA vs. HC |        | RM vs. HC |        | RS vs. HC |         | RS vs. RM |         |
|--------------------|-----------|--------|-----------|--------|-----------|---------|-----------|---------|
|                    | p-value   | FC     | p-value   | FC     | p-value   | FC      | p-value   | FC      |
| DAG(18:0/18:0)     | 0.0452*   | 0.0004 | NS        | NS     | NS        | NS      | NS        | NS      |
| DAG(16:0/16:0)     | NS        | NS     | 0.0022**  | 0.3776 | NS        | NS      | NS        | NS      |
| DAG(16:1/18:0)     | NS        | NS     | 0.0083**  | 0.0022 | NS        | NS      | 0.0118*   | 62.2906 |
| DAG(18:0/18:2)     | NS        | NS     | 0.0289*   | 1.3998 | NS        | NS      | 0.0073**  | 0.7144  |
| DAG(18:1/20:0)     | NS        | NS     | 0.0318*   | 0.4852 | NS        | NS      | NS        | NS      |
| DAG(14:0/16:0)     | NS        | NS     | 0.0342*   | 0.4391 | 0.0001*** | 0.3468  | NS        | NS      |
| DAG(16:0/16:1)     | NS        | NS     | NS        | NS     | 0.0002*** | 0.2289  | 0.0000*** | 0.2556  |
| DAG(16:1/16:1)     | NS        | NS     | NS        | NS     | 0.0005*** | 0.4692  | 0.0013**  | 0.4486  |
| DAG(14:0/18:0)     | NS        | NS     | NS        | NS     | 0.0024**  | 0.4163  | 0.0032**  | 0.4570  |
| DAG(14:0/18:2)     | NS        | NS     | NS        | NS     | 0.0175*   | 79.5900 | NS        | NS      |
| DAG(18:1/18:3)     | NS        | NS     | NS        | NS     | NS        | NS      | 0.0153*   | 3.5526  |
| DAG(16:1/18:2)     | NS        | NS     | NS        | NS     | NS        | NS      | 0.0180*   | 0.2912  |
| DAG(16:1/18:1)     | NS        | NS     | NS        | NS     | NS        | NS      | 0.0357*   | 0.6762  |
| FFA(22:5)          | 0.0239*   | 1.3138 | 0.0001*** | 1.4707 | 0.0000*** | 1.6635  | NS        | NS      |
| FFA(22:3)          | NS        | NS     | 0.0211*   | 0.7927 | 0.0032**  | 0.7727  | NS        | NS      |
| FFA(20:5)          | NS        | NS     | NS        | NS     | 0.0000*** | 0.3460  | 0.0007*** | 0.4288  |
| FFA(20:4)          | NS        | NS     | NS        | NS     | 0.0000*** | 0.3142  | 0.0013**  | 0.4178  |
| FFA(16:2)          | NS        | NS     | NS        | NS     | 0.0008*** | 2.7215  | 0.0089**  | 2.5165  |
| FFA(20:3)          | NS        | NS     | NS        | NS     | 0.0027**  | 0.4839  | 0.0137*   | 0.5805  |
| FFA(14:0)          | NS        | NS     | NS        | NS     | 0.0157*   | 1.1680  | NS        | NS      |
| HexCer(d18:1/22:1) | NS        | NS     | 0.0258*   | 1.1728 | NS        | NS      | NS        | NS      |

|                |         |        |           |        |          |         |           |        |
|----------------|---------|--------|-----------|--------|----------|---------|-----------|--------|
| LPC(22:1)      | NS      | NS     | 0.0017**  | 1.5361 | 0.0184*  | 1.3952  | NS        | NS     |
| LPC(15:0)      | NS      | NS     | 0.0025**  | 1.4402 | 0.0034** | 1.3768  | NS        | NS     |
| LPC(O/16:0)    | NS      | NS     | 0.0051**  | 1.3959 | 0.0035** | 1.5499  | NS        | NS     |
| LPC(18:3)      | NS      | NS     | 0.0127*   | 1.4367 | NS       | NS      | NS        | NS     |
| LPC(16:0)      | NS      | NS     | 0.0172*   | 1.0746 | NS       | NS      | NS        | NS     |
| LPC(O/18:0)    | NS      | NS     | 0.0211*   | 1.2171 | 0.0243*  | 1.2419  | NS        | NS     |
| LPC(18:0)      | NS      | NS     | 0.0294*   | 1.0667 | 0.0218*  | 1.0644  | NS        | NS     |
| LPC(16:1)      | NS      | NS     | NS        | NS     | 0.0161*  | 1.5825  | NS        | NS     |
| LPC(18:1)      | NS      | NS     | NS        | NS     | 0.0360*  | 12.9130 | NS        | NS     |
| LPC(20:0)      | NS      | NS     | NS        | NS     | 0.0411*  | 1.2983  | NS        | NS     |
| LPE(14:0)      | NS      | NS     | 0.0017**  | 1.6180 | 0.0100*  | 1.6455  | NS        | NS     |
| LPE(20:5)      | NS      | NS     | 0.0169*   | 1.5349 | NS       | NS      | 0.0052**  | 0.6646 |
| LPE(20:4)      | NS      | NS     | NS        | NS     | 0.0016** | 1.9855  | NS        | NS     |
| LPE(20:3)      | NS      | NS     | NS        | NS     | 0.0090** | 1.8558  | NS        | NS     |
| LPE(22:6)      | NS      | NS     | NS        | NS     | 0.0162*  | 1.7027  | NS        | NS     |
| LPE(20:0)      | NS      | NS     | NS        | NS     | 0.0492*  | 1.5272  | NS        | NS     |
| LPE(18:0)      | NS      | NS     | NS        | NS     | NS       | NS      | 0.0104*   | 0.7220 |
| LPE(20:2)      | NS      | NS     | NS        | NS     | NS       | NS      | 0.0130*   | 0.4428 |
| MAG(22:5)      | NS      | NS     | NS        | NS     | 0.0325*  | 1.4666  | 0.0284*   | 1.3445 |
| MAG(16:1)      | NS      | NS     | NS        | NS     | NS       | NS      | 0.0004*** | 2.6846 |
| PA(16:0/18:0)  | NS      | NS     | NS        | NS     | 0.0262*  | 3.3436  | 0.0483*   | 1.8069 |
| PC(16:0/22:3)  | 0.0144* | 1.1583 | NS        | NS     | 0.0022** | 1.2545  | NS        | NS     |
| PC(16:0/20:3)  | 0.0218* | 0.6984 | NS        | NS     | 0.0150*  | 0.7121  | NS        | NS     |
| PC(16:0p/16:0) | 0.0443* | 1.3863 | NS        | NS     | 0.0031** | 1.9793  | 0.0093**  | 1.5866 |
| PC(18:2p/18:2) | NS      | NS     | 0.0007*** | 1.3690 | NS       | NS      | 0.0026**  | 0.6753 |
| PC(18:2e/16:0) | NS      | NS     | 0.0013**  | 1.7085 | NS       | NS      | 0.0032**  | 0.7405 |

|                |    |    |          |        |           |          |           |          |
|----------------|----|----|----------|--------|-----------|----------|-----------|----------|
| PC(16:0p/22:6) | NS | NS | 0.0039** | 1.8914 | 0.0232*   | 1.8199   | NS        | NS       |
| PC(18:2p/20:4) | NS | NS | 0.0101*  | 1.9928 | 0.0374*   | 1.7423   | NS        | NS       |
| PC(16:0p/18:1) | NS | NS | 0.0118*  | 1.3916 | NS        | NS       | 0.0094**  | 0.7512   |
| PC(16:0e/16:0) | NS | NS | 0.0135*  | 1.1504 | 0.0065**  | 1.2329   | NS        | NS       |
| PC(18:0p/16:0) | NS | NS | 0.0211*  | 2.8662 | 0.0023**  | 4.2032   | NS        | NS       |
| PC(18:1e/16:0) | NS | NS | 0.0371*  | 3.3172 | 0.0035**  | 4.8857   | NS        | NS       |
| PC(16:0e/18:1) | NS | NS | 0.0390*  | 1.9566 | 0.0054**  | 3.4696   | NS        | NS       |
| PC(16:0e/18:0) | NS | NS | 0.0430*  | 1.1957 | 0.0008*** | 1.3743   | 0.0237*   | 1.1494   |
| PC(16:0e/16:1) | NS | NS | NS       | NS     | 0.0002*** | 2.2169   | 0.0006*** | 1.8331   |
| PC(18:0p/14:0) | NS | NS | NS       | NS     | 0.0004*** | 1.8828   | 0.0005*** | 1.5671   |
| PC(18:0e/16:0) | NS | NS | NS       | NS     | 0.0005*** | 1.3554   | 0.0213*   | 1.1086   |
| PC(18:0e/18:0) | NS | NS | NS       | NS     | 0.0007*** | 1.3099   | 0.0005*** | 1.2586   |
| PC(16:0e/20:2) | NS | NS | NS       | NS     | 0.0015**  | 1.3457   | 0.0001*** | 1.4145   |
| PC(18:1e/18:1) | NS | NS | NS       | NS     | 0.0016**  | 519.8399 | 0.0056**  | 18.2632  |
| PC(16:0p/18:0) | NS | NS | NS       | NS     | 0.0024**  | 3.1187   | 0.0178*   | 1.3593   |
| PC(14:0/16:0)  | NS | NS | NS       | NS     | 0.0035**  | 1.6500   | NS        | NS       |
| PC(16:0e/20:4) | NS | NS | NS       | NS     | 0.0063**  | 1.3920   | NS        | NS       |
| PC(16:0p/20:1) | NS | NS | NS       | NS     | 0.0107*   | 1.2465   | 0.0020**  | 1.3002   |
| PC(18:0p/18:0) | NS | NS | NS       | NS     | 0.0162*   | 0.8728   | NS        | NS       |
| PC(16:0/18:0)  | NS | NS | NS       | NS     | 0.0194*   | 1.5033   | NS        | NS       |
| PC(18:2e/12:0) | NS | NS | NS       | NS     | 0.0209*   | 1.3505   | NS        | NS       |
| PC(18:0p/18:1) | NS | NS | NS       | NS     | 0.0250*   | 38.7653  | 0.0011**  | 969.6255 |
| PC(16:0p/20:0) | NS | NS | NS       | NS     | 0.0282*   | 0.8703   | NS        | NS       |
| PC(16:0/20:0)  | NS | NS | NS       | NS     | 0.0300*   | 1.4133   | 0.0011**  | 2.2353   |
| PC(16:0p/18:3) | NS | NS | NS       | NS     | 0.0310*   | 1.2043   | NS        | NS       |
| PC(18:2e/18:0) | NS | NS | NS       | NS     | 0.0382*   | 1.1427   | NS        | NS       |

|                |    |    |         |         |           |          |           |         |
|----------------|----|----|---------|---------|-----------|----------|-----------|---------|
| PC(18:2/20:3)  | NS | NS | NS      | NS      | 0.0453*   | 1.2829   | NS        | NS      |
| PC(16:0/20:1)  | NS | NS | NS      | NS      | NS        | NS       | 0.0015**  | 1.3627  |
| PC(16:0p/16:1) | NS | NS | NS      | NS      | NS        | NS       | 0.0082**  | 16.4773 |
| PC(18:2/20:2)  | NS | NS | NS      | NS      | NS        | NS       | 0.0185*   | 1.1956  |
| PC(16:0/22:5)  | NS | NS | NS      | NS      | NS        | NS       | 0.0224*   | 5.5341  |
| PC(16:0/22:6)  | NS | NS | NS      | NS      | NS        | NS       | 0.0237*   | 1.2426  |
| PC(16:0e/18:2) | NS | NS | NS      | NS      | NS        | NS       | 0.0258*   | 0.0808  |
| PE(16:0/22:4)  | NS | NS | 0.0281* | 1.1227  | NS        | NS       | NS        | NS      |
| PE(18:0/22:5)  | NS | NS | 0.0396* | 1.1662  | 0.0032**  | 1.5394   | NS        | NS      |
| PE(16:0/18:0)  | NS | NS | NS      | NS      | 0.0112*   | 1.3558   | 0.0011**  | 1.3897  |
| PI(16:0/20:3)  | NS | NS | NS      | NS      | 0.0132*   | 13.0577  | 0.0043**  | 13.0577 |
| PI(18:0/20:3)  | NS | NS | NS      | NS      | 0.0450*   | 1.8966   | NS        | NS      |
| PI(16:0/16:0)  | NS | NS | NS      | NS      | NS        | NS       | 0.0137*   | 1.4627  |
| SM(d18:1/18:4) | NS | NS | 0.0116* | 2.6862  | NS        | NS       | NS        | NS      |
| SM(d18:1/16:0) | NS | NS | 0.0400* | 82.5216 | NS        | NS       | NS        | NS      |
| SM(d18:1/20:5) | NS | NS | NS      | NS      | 0.0005*** | 2.4936   | 0.0032**  | 1.5085  |
| SM(d18:1/20:4) | NS | NS | NS      | NS      | 0.0010**  | 2.4655   | NS        | NS      |
| SM(d18:1/22:3) | NS | NS | NS      | NS      | 0.0029**  | 1.6366   | NS        | NS      |
| SM(d18:1/22:0) | NS | NS | NS      | NS      | 0.0042**  | 1.3313   | 0.0407*   | 1.3135  |
| SM(d18:1/22:4) | NS | NS | NS      | NS      | 0.0159*   | 181.9263 | NS        | NS      |
| SM(d18:1/20:2) | NS | NS | NS      | NS      | 0.0406*   | 1.1671   | 0.0049**  | 1.2470  |
| SM(d18:1/18:3) | NS | NS | NS      | NS      | 0.0407*   | 1.4917   | NS        | NS      |
| SM(d18:1/18:2) | NS | NS | NS      | NS      | 0.0416*   | 71.6994  | 0.0001*** | 71.6994 |
| SM(d18:1/20:1) | NS | NS | NS      | NS      | 0.0440*   | 1.1761   | 0.0019**  | 1.3214  |
| SM(d18:1/22:6) | NS | NS | NS      | NS      | NS        | NS       | 0.0278*   | 0.5009  |
| TAG(50:0)      | NS | NS | 0.0139* | 0.0317  | NS        | NS       | 0.0010*** | 43.3016 |

|           |    |    |         |        |          |        |          |        |
|-----------|----|----|---------|--------|----------|--------|----------|--------|
| TAG(52:5) | NS | NS | 0.0220* | 0.0951 | NS       | NS     | NS       | NS     |
| TAG(50:2) | NS | NS | NS      | NS     | 0.0030** | 0.0885 | NS       | NS     |
| TAG(48:1) | NS | NS | NS      | NS     | 0.0362*  | 0.8801 | 0.0173*  | 0.9376 |
| TAG(52:4) | NS | NS | NS      | NS     | NS       | NS     | 0.0037** | 1.3947 |
| TAG(54:5) | NS | NS | NS      | NS     | NS       | NS     | 0.0130*  | 0.8682 |
| TAG(50:1) | NS | NS | NS      | NS     | NS       | NS     | 0.0138*  | 0.8277 |

**Abbreviation:** CE, Cholesteryl ester; Cer, Ceramide; DAG, Diacylglycerol; FC, fold change; FFA, free fatty acid; HCs, healthy controls; HexCer, Hexosylceramide; LPA, lysoPhosphatidic acid; LPC, lysoPhosphatidylcholine; LPE, lysoPhosphatidylethanolamine; MAG, Monoacylglycerol; NS, non-significantly changed; PA, phosphatidic acid; PC, phosphatidylcholine; PE, phosphatidylethanolamine; PG, Phosphatidylglycerol; RAs, recovered asymptomatic patients; RMs, recovered moderate patients; RSs, recovered severe and critical patients; SM, sphingomyelin; TAG, triacylglycerol.

\*p<0.05, \*\*p<0.01, \*\*\*p<0.001.

**Table S7. Relationship between the differential lipids of RM vs. HC and clinical indices**

| <b>Lipids</b>      | <b>Clinical indices</b> | <b>Correlation coefficient</b> | <b>p-value</b> |
|--------------------|-------------------------|--------------------------------|----------------|
| DAG(14.0/16.0)     | APTT                    | 0.3275                         | 0.0216*        |
| DAG(14.0/16.0)     | HCT                     | -0.3002                        | 0.0361*        |
| DAG(14.0/16.0)     | UA                      | -0.3044                        | 0.0335*        |
| DAG(16.0/16.0)     | PDW                     | -0.3082                        | 0.0312*        |
| DAG(16.0/16.0)     | HCT                     | -0.3692                        | 0.0090**       |
| DAG(16.1/18.0)     | UA                      | 0.3296                         | 0.0207*        |
| DAG(18.0/18.2)     | UA                      | -0.3524                        | 0.0130*        |
| DAG(18.0/18.2)     | Mg                      | -0.3791                        | 0.0102*        |
| DAG(18.0/18.2)     | Creatinine              | -0.3861                        | 0.0061**       |
| DAG(18.0/18.2)     | BUN                     | -0.4173                        | 0.0029**       |
| DAG(18.1/20.0)     | MCH                     | 0.3451                         | 0.0152*        |
| DAG(18.1/20.0)     | MCV                     | 0.2868                         | 0.0457*        |
| DAG(18.1/20.0)     | $\alpha$ -HBDH          | -0.2894                        | 0.0437*        |
| DAG(18.1/20.0)     | PDW                     | -0.3100                        | 0.0302*        |
| DAG(18.1/20.0)     | PLT                     | -0.3129                        | 0.0286*        |
| DAG(18.1/20.0)     | CK-MB activity          | -0.3199                        | 0.0250*        |
| DAG(18.1/20.0)     | PCT                     | -0.4133                        | 0.0032**       |
| FFA(22.5)          | CO2                     | -0.3431                        | 0.0158*        |
| FFA(22:3)          | RBC                     | 0.3032                         | 0.0342*        |
| HexCer(d18:1/22:1) | Basophils%              | 0.3432                         | 0.0158*        |
| LPC(15.0)          | Basophils%              | 0.3659                         | 0.0097**       |
| LPC(15.0)          | Basophils               | 0.3265                         | 0.0220*        |
| LPC(15.0)          | MCH                     | -0.2874                        | 0.0453*        |
| LPC(15.0)          | AST                     | -0.3009                        | 0.0356*        |
| LPC(15.0)          | CK-MB                   | -0.3089                        | 0.0326*        |
| LPC(15.0)          | HGB                     | -0.3427                        | 0.0159*        |
| LPC(16.0)          | Basophils%              | 0.3504                         | 0.0136*        |
| LPC(16.0)          | Eosinophils%            | 0.3206                         | 0.0247*        |
| LPC(16.0)          | Basophils               | 0.2834                         | 0.0484*        |
| LPC(16.0)          | HGB                     | -0.3109                        | 0.0297*        |
| LPC(18.0)          | Eosinophils%            | 0.2857                         | 0.0466*        |
| LPC(18.0)          | Mg                      | -0.3074                        | 0.0399*        |
| LPC(18.0)          | HGB                     | -0.3233                        | 0.0235*        |
| LPC(18.3)          | A/G                     | 0.3187                         | 0.0256*        |
| LPC(18.3)          | Basophils%              | 0.2942                         | 0.0402*        |
| LPC(18.3)          | RBC                     | -0.2967                        | 0.0384*        |
| LPC(18.3)          | Creatinine              | -0.3160                        | 0.0270*        |
| LPC(18.3)          | ALT                     | -0.3502                        | 0.0136*        |
| LPC(18.3)          | r-GT                    | -0.3520                        | 0.0131*        |
| LPC(18.3)          | HGB                     | -0.4010                        | 0.0043**       |

|                |                |         |           |
|----------------|----------------|---------|-----------|
| LPC(22:1)      | Basophils%     | 0.3114  | 0.0294*   |
| LPC(22:1)      | Ca             | 0.3093  | 0.0387*   |
| LPC(O/16:0)    | Basophils%     | 0.3851  | 0.0063**  |
| LPC(O/16:0)    | Basophils      | 0.3322  | 0.0197*   |
| LPC(O/16:0)    | Eosinophils    | 0.2843  | 0.0477*   |
| LPC(O/16:0)    | Eosinophils%   | 0.2822  | 0.0495*   |
| LPC(O/16:0)    | Creatinine     | -0.2830 | 0.0488*   |
| LPC(O/16:0)    | CK-MB          | -0.2938 | 0.0427*   |
| LPC(O/16:0)    | AST            | -0.3125 | 0.0288*   |
| LPC(O/16:0)    | HGB            | -0.3381 | 0.0175*   |
| LPC(O/18:0)    | Eosinophils    | 0.3171  | 0.0264*   |
| LPC(O/18:0)    | Eosinophils%   | 0.3105  | 0.0299*   |
| LPC(O/18:0)    | Basophils%     | 0.3044  | 0.0334*   |
| LPC(O/18:0)    | Creatinine     | -0.2966 | 0.0385*   |
| LPC(O/18:0)    | CK-MB          | -0.2981 | 0.0396*   |
| LPC(O/18:0)    | AST            | -0.3304 | 0.0204*   |
| LPC(O/18:0)    | HGB            | -0.3607 | 0.0109*   |
| LPE(14:0)      | Basophils%     | 0.4247  | 0.0024**  |
| LPE(14:0)      | Basophils      | 0.3604  | 0.0110*   |
| LPE(14:0)      | Ca             | 0.3337  | 0.0251*   |
| LPE(14:0)      | TT             | 0.3070  | 0.0319*   |
| LPE(14:0)      | $\alpha$ -HBDH | 0.3045  | 0.0334*   |
| LPE(14:0)      | ALT            | -0.2928 | 0.0412*   |
| LPE(14:0)      | DBIL           | -0.3096 | 0.0304*   |
| LPE(14:0)      | RBC            | -0.3293 | 0.0209*   |
| LPE(14:0)      | Creatinine     | -0.3547 | 0.0124*   |
| LPE(14:0)      | AST            | -0.3583 | 0.0115*   |
| LPE(14:0)      | CO2            | -0.3972 | 0.0047**  |
| LPE(14:0)      | IBIL           | -0.4033 | 0.0041**  |
| LPE(14:0)      | TBIL           | -0.4045 | 0.0039**  |
| LPE(14:0)      | HGB            | -0.4732 | 0.0006*** |
| LPE(20:5)      | Basophils%     | 0.3740  | 0.0081**  |
| LPE(20:5)      | Basophils      | 0.3423  | 0.0161*   |
| LPE(20:5)      | Eosinophils%   | 0.3404  | 0.0167*   |
| LPE(20:5)      | Eosinophils    | 0.2991  | 0.0368*   |
| LPE(20:5)      | HGB            | -0.2880 | 0.0447*   |
| LPE(20:5)      | MCV            | -0.2935 | 0.0407*   |
| PC(16:0e/16:0) | $\alpha$ -HBDH | 0.3155  | 0.0272*   |
| PC(16:0e/16:0) | Basophils      | 0.2897  | 0.0435*   |
| PC(16:0e/16:0) | APTT           | 0.2875  | 0.0451*   |
| PC(16:0e/16:0) | AST            | -0.3655 | 0.0098**  |
| PC(16:0e/18:0) | Eosinophils    | 0.2915  | 0.0422*   |
| PC(16:0e/18:0) | TT             | 0.2869  | 0.0456*   |
| PC(16:0e/18:0) | Creatinine     | -0.2893 | 0.0438*   |

|                |                |         |          |
|----------------|----------------|---------|----------|
| PC(16:0e/18:0) | CO2            | -0.2903 | 0.0430*  |
| PC(16:0e/18:0) | CK-MB          | -0.2936 | 0.0428*  |
| PC(16:0e/18:0) | AST            | -0.3292 | 0.0209*  |
| PC(16:0e/18:0) | MCH            | -0.3336 | 0.0191*  |
| PC(16:0e/18:0) | FIB            | -0.3503 | 0.0136*  |
| PC(16:0e/18:1) | CRP            | 0.3650  | 0.0099** |
| PC(16:0e/18:1) | Albumin        | -0.2839 | 0.0481*  |
| PC(16:0e/18:1) | Creatinine     | -0.3050 | 0.0331*  |
| PC(16:0e/18:1) | DBIL           | -0.3390 | 0.0172*  |
| PC(16:0e/18:1) | HGB            | -0.3748 | 0.0080** |
| PC(16:0e/18:1) | CO2            | -0.3973 | 0.0047** |
| PC(16:0e/18:1) | IBIL           | -0.4462 | 0.0013** |
| PC(16:0e/18:1) | TBIL           | -0.4510 | 0.0011** |
| PC(16:0p/18:1) | CK-MB activity | 0.3433  | 0.0157*  |
| PC(16:0p/18:1) | RBC            | -0.2897 | 0.0435*  |
| PC(16:0p/18:1) | HGB            | -0.3027 | 0.0345*  |
| PC(16:0p/18:1) | CO2            | -0.3119 | 0.0291*  |
| PC(16:0p/18:1) | AST            | -0.3305 | 0.0204*  |
| PC(16:0p/18:1) | UA             | -0.3866 | 0.0061** |
| PC(16:0p/18:1) | Creatinine     | -0.3970 | 0.0047** |
| PC(18:0p/16:0) | CRP            | 0.3163  | 0.0268*  |
| PC(18:0p/16:0) | Basophils%     | 0.3112  | 0.0295*  |
| PC(18:0p/16:0) | CK-MB          | -0.2912 | 0.0446*  |
| PC(18:0p/16:0) | RBC            | -0.2951 | 0.0396*  |
| PC(18:0p/16:0) | Creatinine     | -0.3081 | 0.0312*  |
| PC(18:0p/16:0) | DBIL           | -0.3117 | 0.0292*  |
| PC(18:0p/16:0) | CO2            | -0.3816 | 0.0068** |
| PC(18:0p/16:0) | HGB            | -0.3930 | 0.0052** |
| PC(18:0p/16:0) | TBIL           | -0.4349 | 0.0018** |
| PC(18:0p/16:0) | IBIL           | -0.4362 | 0.0017** |
| PC(18:1e/16:0) | CRP            | 0.3542  | 0.0125*  |
| PC(18:1e/16:0) | Basophils%     | 0.2858  | 0.0465*  |
| PC(18:1e/16:0) | HGB            | -0.3303 | 0.0205*  |
| PC(18:1e/16:0) | DBIL           | -0.3453 | 0.0151*  |
| PC(18:1e/16:0) | CO2            | -0.4210 | 0.0026** |
| PC(18:1e/16:0) | IBIL           | -0.4468 | 0.0013** |
| PC(18:1e/16:0) | TBIL           | -0.4514 | 0.0011** |
| PC(18:2e/16:0) | CK-MB activity | 0.3492  | 0.0139*  |
| PC(18:2e/16:0) | AST            | -0.2925 | 0.0414*  |
| PC(18:2e/16:0) | Creatinine     | -0.3451 | 0.0152*  |
| PC(18:2e/16:0) | CO2            | -0.3642 | 0.0101*  |
| PC(18:2p/18:2) | $\alpha$ -HBDH | 0.4014  | 0.0043** |
| PC(18:2p/18:2) | Basophils%     | 0.3359  | 0.0183*  |
| PC(18:2p/18:2) | Basophils      | 0.3176  | 0.0262*  |



|                |                |         |           |
|----------------|----------------|---------|-----------|
| PC(18:2p/18:2) | TT             | 0.2958  | 0.0390*   |
| PC(18:2p/18:2) | CK-MB activity | 0.2925  | 0.0414*   |
| PC(18:2p/18:2) | BUN            | -0.2860 | 0.0464*   |
| PC(18:2p/18:2) | CO2            | -0.3038 | 0.0338*   |
| PC(18:2p/18:2) | AST            | -0.4041 | 0.0040**  |
| PC(18:2p/18:2) | Creatinine     | -0.4532 | 0.0011**  |
| PE(16.0/22.4)  | Creatinine     | -0.2841 | 0.0479*   |
| PE(18.0/22.5)  | Basophils%     | 0.2867  | 0.0458*   |
| PE(18.0/22.5)  | HCT            | -0.2843 | 0.0477*   |
| PE(18.0/22.5)  | Creatinine     | -0.3113 | 0.0295*   |
| PE(18.0/22.5)  | UA             | -0.3298 | 0.0207*   |
| PE(18.0/22.5)  | Glucose        | -0.3325 | 0.0256*   |
| PE(18.0/22.5)  | RBC            | -0.3997 | 0.0044*   |
| PE(18.0/22.5)  | HGB            | -0.4598 | 0.0009*** |
| SM(d18:1/16:0) | Basophils%     | 0.3069  | 0.0320*   |
| SM(d18:1/16:1) | APTT           | 0.2900  | 0.0433*   |
| SM(d18:1/18:4) | APTT           | 0.2837  | 0.0482*   |
| SM(d18:1/18:4) | MCHC           | -0.2875 | 0.0452*   |
| SM(d18:1/18:4) | CK-MB          | -0.3112 | 0.0313*   |
| SM(d18:1/18:4) | AST            | -0.3285 | 0.0212*   |
| SM(d18:1/18:4) | HGB            | -0.3706 | 0.0088**  |
| SM(d18:1/18:4) | UA             | -0.3763 | 0.0077**  |
| SM(d18:1/18:4) | Creatinine     | -0.4048 | 0.0039**  |
| TAG(52:5)      | CRP            | 0.3286  | 0.0211*   |
| TAG(52:5)      | CO2            | 0.2869  | 0.0456*   |
| TAG(52:5)      | Monocytes      | -0.3621 | 0.0106*   |
| TAG(52:5)      | Monocytes%     | -0.3723 | 0.0084**  |

**Abbreviation:** ALP, alkaline phosphatase; ALT, alanine aminotransferase; APTT, activated partial thromboplastin time; AST, aspartate aminotransferase; BUN, blood urea nitrogen; Ca, calcium; CK-MB, creatine kinase-myocardial band; CRP, C-reactive protein; DAG, diacylglycerol; DBIL, direct bilirubin; FIB, FFA, free fatty acid; fibrinogen; HCs, healthy controls; IBIL, indirect bilirubin; INR, international normalized ratio; LDH, lactate dehydrogenase; LPC, lysoPhosphatidylcholine; LPE, lysoPhosphatidylethanolamine; M, moderate; MCH, mean corpuscular hemoglobin; MCHC, mean corpuscular hemoglobin concentration; MCV, mean corpuscular volume; Mg, magnesium; P, phosphorus; PC, phosphatidylcholine; PCT, plateletocrit; PDW, platelet distribution width; PE, phosphatidylethanolamine; PT, prothrombin time; PI, phosphatidylinositol; RAs, recovered asymptomatic patients; RBC, red blood cell; RDW, red blood cell volume distribution width; RMs, recovered moderate patients; RSs, recovered critical and severe patients; S, critical and severe; SM, sphingomyelin; TAG, triacylglycerol; TBIL, total bilirubin; TT, thrombin time; UA, urine acid; WBC, white blood cell;  $\alpha$ -HBDH,  $\alpha$ -hydroxybutyrate dehydrogenase;  $\gamma$ -GT,  $\gamma$ -glutamyl transpeptidase; Statistical significance was set at 2-sided. \* $p < 0.05$ , \*\* $p < 0.01$ , \*\*\* $p < 0.001$ .

**Table S8. Relationship between the differential lipids of RS vs. HC and clinical indices**

| <b>Lipids</b>  | <b>clinical indices</b> | <b>Correlation coefficient</b> | <b>p-value</b> |
|----------------|-------------------------|--------------------------------|----------------|
| DAG(14:0/16:0) | HGB                     | 0.4017                         | 0.0038**       |
| DAG(14:0/16:0) | Mg                      | 0.3902                         | 0.0051**       |
| DAG(14:0/16:0) | Creatinine              | 0.3745                         | 0.0074**       |
| DAG(14:0/16:0) | PDW                     | 0.3262                         | 0.0208*        |
| DAG(14:0/16:0) | HCT                     | 0.3247                         | 0.0214*        |
| DAG(14:0/16:0) | RBC                     | 0.3158                         | 0.0255*        |
| DAG(14:0/16:0) | Ca                      | -0.2823                        | 0.0470*        |
| DAG(14:0/18:0) | PDW                     | 0.4229                         | 0.0022**       |
| DAG(14:0/18:0) | MPV                     | 0.3219                         | 0.0226*        |
| DAG(14:0/18:0) | Mg                      | 0.3057                         | 0.0308*        |
| DAG(14:0/18:2) | MCHC                    | -0.3552                        | 0.0114*        |
| DAG(14:0/18:2) | HGB                     | -0.3393                        | 0.0159*        |
| DAG(14:0/18:2) | Ca                      | 0.3056                         | 0.0309*        |
| DAG(14:0/18:2) | CO2                     | -0.3241                        | 0.0319*        |
| DAG(14:0/18:2) | TT                      | -0.3059                        | 0.0489*        |
| DAG(16:0/16:1) | PDW                     | 0.5091                         | 0.0002***      |
| DAG(16:0/16:1) | Creatinine              | 0.3522                         | 0.0121*        |
| DAG(16:0/16:1) | MPV                     | 0.3452                         | 0.0141*        |
| DAG(16:0/16:1) | HGB                     | 0.3092                         | 0.0289*        |
| DAG(16:0/16:1) | PT                      | 0.3265                         | 0.0348*        |
| DAG(16:0/16:1) | INR                     | 0.3265                         | 0.0348*        |
| DAG(16:0/16:1) | Mg                      | 0.2957                         | 0.0371*        |
| DAG(16:0/16:1) | Ca                      | -0.2881                        | 0.0424*        |
| DAG(16:0/16:1) | PDW                     | 0.3731                         | 0.0076**       |
| DAG(16:0/16:1) | Mg                      | 0.3586                         | 0.0105*        |
| DAG(16:0/16:1) | PT                      | 0.3888                         | 0.0109*        |
| DAG(16:0/16:1) | INR                     | 0.3888                         | 0.0109*        |
| FFA(14:0)      | FIB                     | 0.3939                         | 0.0099**       |
| FFA(14:0)      | Mg                      | -0.3195                        | 0.0237*        |
| FFA(14:0)      | ALP                     | -0.2996                        | 0.0345*        |
| FFA(16:2)      | Mg                      | -0.4138                        | 0.0028**       |
| FFA(16:2)      | APTT                    | -0.4156                        | 0.0062**       |
| FFA(20:3)      | ALP                     | 0.5220                         | 0.0001***      |
| FFA(20:3)      | Mg                      | 0.4069                         | 0.0034**       |
| FFA(20:3)      | FIB                     | -0.3532                        | 0.0218*        |
| FFA(20:3)      | Ca                      | -0.3146                        | 0.0261*        |
| FFA(20:3)      | Creatinine              | 0.3137                         | 0.0265*        |
| FFA(20:3)      | Glucose                 | -0.3012                        | 0.0336*        |
| FFA(20:3)      | HCT                     | 0.2966                         | 0.0365*        |
| FFA(20:3)      | PT                      | 0.3127                         | 0.0438*        |
| FFA(20:3)      | INR                     | 0.3127                         | 0.0438*        |

|           |              |         |           |
|-----------|--------------|---------|-----------|
| FFA(20:4) | Mg           | 0.5258  | 0.0001*** |
| FFA(20:4) | CO2          | 0.4441  | 0.0025**  |
| FFA(20:4) | HGB          | 0.3636  | 0.0094**  |
| FFA(20:4) | HCT          | 0.2929  | 0.0390*   |
| FFA(20:4) | Ca           | -0.2900 | 0.0411*   |
| FFA(20:4) | ALP          | 0.2897  | 0.0413*   |
| FFA(20:4) | RBC          | 0.2846  | 0.0452*   |
| FFA(20:5) | Mg           | 0.4904  | 0.0003*** |
| FFA(20:5) | CO2          | 0.4550  | 0.0019**  |
| FFA(20:5) | HGB          | 0.3491  | 0.0130*   |
| FFA(20:5) | Glucose      | -0.2991 | 0.0349*   |
| FFA(22:3) | Ca           | -0.3145 | 0.0261*   |
| FFA(22:3) | ALP          | 0.2969  | 0.0363*   |
| FFA(22:3) | RDW          | -0.2962 | 0.0367*   |
| FFA(22:5) | HCT          | -0.3730 | 0.0076**  |
| FFA(22:5) | Glucose      | 0.3668  | 0.0088**  |
| FFA(22:5) | Mg           | -0.3564 | 0.0111*   |
| FFA(22:5) | Ca           | 0.3555  | 0.0113*   |
| FFA(22:5) | Creatinine   | -0.3543 | 0.0116*   |
| FFA(22:5) | HGB          | -0.3390 | 0.0160*   |
| FFA(22:5) | RBC          | -0.3178 | 0.0245*   |
| FFA(22:5) | ALP          | -0.3037 | 0.0320*   |
| LPC(15:0) | DBIL         | -0.4795 | 0.0004*** |
| LPC(15:0) | TBIL         | -0.4443 | 0.0012**  |
| LPC(15:0) | Creatinine   | -0.4420 | 0.0013**  |
| LPC(15:0) | HCT          | -0.4089 | 0.0032**  |
| LPC(15:0) | IBIL         | -0.4063 | 0.0034**  |
| LPC(15:0) | HGB          | -0.3919 | 0.0049**  |
| LPC(15:0) | WBC          | -0.3682 | 0.0085**  |
| LPC(15:0) | Neutrophils  | -0.3637 | 0.0094**  |
| LPC(15:0) | RBC          | -0.3625 | 0.0097**  |
| LPC(15:0) | r.GT         | -0.3621 | 0.0098**  |
| LPC(15:0) | Ca           | 0.3413  | 0.0153*   |
| LPC(15:0) | CO2          | -0.3578 | 0.0171*   |
| LPC(15:0) | Albumin      | -0.3318 | 0.0186*   |
| LPC(15:0) | Monocytes    | -0.3124 | 0.0272*   |
| LPC(15:0) | AST          | -0.3105 | 0.0282    |
| LPC(16:1) | DBIL         | -0.4404 | 0.0014**  |
| LPC(16:1) | TBIL         | -0.4323 | 0.0017**  |
| LPC(16:1) | IBIL         | -0.4125 | 0.0029**  |
| LPC(16:1) | Eosinophils  | -0.3494 | 0.0129*   |
| LPC(16:1) | RDW          | 0.3280  | 0.0201*   |
| LPC(16:1) | Basophils    | -0.3199 | 0.0236*   |
| LPC(16:1) | Eosinophils% | -0.3033 | 0.0323*   |

|             |             |         |           |
|-------------|-------------|---------|-----------|
| LPC(16:1)   | Creatinine  | -0.2974 | 0.0359*   |
| LPC(16:1)   | CO2         | -0.3078 | 0.0421*   |
| LPC(22:1)   | WBC         | -0.4565 | 0.0009*** |
| LPC(22:1)   | Neutrophils | -0.3802 | 0.0065**  |
| LPC(22:1)   | Albumin     | -0.3639 | 0.0094**  |
| LPC(22:1)   | Monocytes   | -0.2866 | 0.0436*   |
| LPC(22:1)   | Lymphocytes | -0.2814 | 0.0478*   |
| LPC(O/16:0) | Creatinine  | -0.4860 | 0.0003*** |
| LPC(O/16:0) | DBIL        | -0.4584 | 0.0008*** |
| LPC(O/16:0) | HCT         | -0.4380 | 0.0015**  |
| LPC(O/16:0) | TBIL        | -0.4303 | 0.0018**  |
| LPC(O/16:0) | HGB         | -0.4211 | 0.0023**  |
| LPC(O/16:0) | Neutrophils | -0.3987 | 0.0041**  |
| LPC(O/16:0) | WBC         | -0.3974 | 0.0043**  |
| LPC(O/16:0) | IBIL        | -0.3924 | 0.0048**  |
| LPC(O/16:0) | RBC         | -0.3738 | 0.0075**  |
| LPC(O/16:0) | Ca          | 0.3734  | 0.0076**  |
| LPC(O/16:0) | r-GT        | -0.3504 | 0.0126*   |
| LPC(O/16:0) | Monocytes   | -0.3410 | 0.0154*   |
| LPC(O/16:0) | CO2         | -0.3626 | 0.0156*   |
| LPC(O/16:0) | AST         | -0.3211 | 0.0230*   |
| LPC(O/16:0) | Albumin     | -0.2992 | 0.0348*   |
| LPC(O/16:0) | LDH         | -0.2936 | 0.0385*   |
| LPC(O/18:0) | Creatinine  | -0.4313 | 0.0018**  |
| LPC(O/18:0) | r-GT        | -0.4198 | 0.0024**  |
| LPC(O/18:0) | AST         | -0.4195 | 0.0024**  |
| LPC(O/18:0) | DBIL        | -0.4075 | 0.0033**  |
| LPC(O/18:0) | Albumin     | -0.3673 | 0.0087**  |
| LPC(O/18:0) | TBIL        | -0.3639 | 0.0094**  |
| LPC(O/18:0) | ALT         | -0.3316 | 0.0187*   |
| LPC(O/18:0) | IBIL        | -0.3305 | 0.0191*   |
| LPC(O/18:0) | HCT         | -0.3147 | 0.0260*   |
| LPC(O/18:0) | RBC         | -0.3145 | 0.0261*   |
| LPC(O/18:0) | LDH         | -0.3111 | 0.0279*   |
| LPC(O/18:0) | HGB         | -0.3097 | 0.0286*   |
| LPC(O/18:0) | CO2         | -0.3224 | 0.0328*   |
| LPC(O/18:0) | WBC         | -0.2960 | 0.0369*   |
| LPC(O/18:0) | TP          | -0.2869 | 0.0434*   |
| LPC(O/18:0) | Monocytes   | -0.2838 | 0.0458*   |
| LPE(14:0)   | IBIL        | -0.4916 | 0.0003*** |
| LPE(14:0)   | TBIL        | -0.4535 | 0.0009*** |
| LPE(14:0)   | DBIL        | -0.3622 | 0.0097**  |
| LPE(14:0)   | Glucose     | 0.3445  | 0.0143*   |
| LPE(14:0)   | Eosinophils | -0.3220 | 0.0226*   |

|               |                |         |           |
|---------------|----------------|---------|-----------|
| LPE(14:0)     | Basophils      | -0.2828 | 0.0466*   |
| LPE(14:0)     | CO2            | -0.2994 | 0.0484*   |
| LPE(20:3)     | DBIL           | -0.5377 | 0.0001*** |
| LPE(20:3)     | TBIL           | -0.5208 | 0.0001*** |
| LPE(20:3)     | IBIL           | -0.4838 | 0.0004*** |
| LPE(20:3)     | Eosinophils    | -0.3750 | 0.0073**  |
| LPE(20:3)     | Monocytes      | -0.3363 | 0.0169*   |
| LPE(20:3)     | Creatinine     | -0.3340 | 0.0178*   |
| LPE(20:3)     | Eosinophils%   | -0.3053 | 0.0311*   |
| LPE(20:3)     | CO2            | -0.3212 | 0.0335*   |
| LPE(20:3)     | $\alpha$ -HBDH | 0.3262  | 0.0350*   |
| LPE(20:3)     | LDH            | -0.2818 | 0.0474*   |
| LPE(20:3)     | Neutrophils    | -0.2792 | 0.0496*   |
| LPE(20:4)     | DBIL           | -0.5054 | 0.0002*** |
| LPE(20:4)     | TBIL           | -0.4558 | 0.0009*** |
| LPE(20:4)     | Creatinine     | -0.4537 | 0.0009*** |
| LPE(20:4)     | IBIL           | -0.4044 | 0.0036**  |
| LPE(20:4)     | HCT            | -0.3807 | 0.0064**  |
| LPE(20:4)     | CO2            | -0.3821 | 0.0105*   |
| LPE(20:4)     | HGB            | -0.3475 | 0.0134*   |
| LPE(20:4)     | PDW            | -0.3377 | 0.0165*   |
| LPE(20:4)     | Neutrophils    | -0.3345 | 0.0176*   |
| LPE(20:4)     | Monocytes      | -0.2974 | 0.0359*   |
| LPE(20:4)     | RBC            | -0.2948 | 0.0377*   |
| LPE(20:4)     | Eosinophils    | -0.2939 | 0.0383*   |
| LPE(20:4)     | WBC            | -0.2864 | 0.0437*   |
| PC(14:0/16:0) | DBIL           | -0.3430 | 0.0147*   |
| PC(14:0/16:0) | TBIL           | -0.3345 | 0.0176*   |
| PC(14:0/16:0) | IBIL           | -0.3179 | 0.0244*   |
| PC(14:0/16:0) | CO2            | -0.3190 | 0.0348*   |
| PC(14:0/16:0) | HGB            | -0.2983 | 0.0354*   |
| PC(14:0/16:0) | APTT           | -0.3102 | 0.0456*   |
| PC(16:0/18:0) | Neutrophils    | -0.4760 | 0.0005*** |
| PC(16:0/18:0) | WBC            | -0.4116 | 0.0030**  |
| PC(16:0/18:0) | IBIL           | -0.4092 | 0.0032**  |
| PC(16:0/18:0) | TBIL           | -0.3942 | 0.0046**  |
| PC(16:0/18:0) | RDW            | 0.3758  | 0.0072**  |
| PC(16:0/18:0) | DBIL           | -0.3541 | 0.0116*   |
| PC(16:0/18:0) | Creatinine     | -0.3457 | 0.0139*   |
| PC(16:0/18:0) | Eosinophils    | -0.3289 | 0.0197*   |
| PC(16:0/18:0) | $\alpha$ -HBDH | 0.3468  | 0.0244*   |
| PC(16:0/18:0) | Monocytes      | -0.2880 | 0.0425*   |
| PC(16:0/20:0) | PDW            | -0.5390 | 0.0001*** |
| PC(16:0/20:0) | FIB            | 0.3792  | 0.0133*   |

|                |                |         |          |
|----------------|----------------|---------|----------|
| PC(16:0/20:0)  | MPV            | -0.3355 | 0.0172*  |
| PC(16:0/20:0)  | Ca             | 0.3243  | 0.0216*  |
| PC(16:0/20:0)  | RBC            | -0.3023 | 0.0329*  |
| PC(16:0/20:0)  | ALP            | -0.2952 | 0.0374*  |
| PC(16:0/22:3)  | CK-MB activity | 0.3657  | 0.0172*  |
| PC(16:0/22:3)  | Eosinophils%   | -0.3083 | 0.0294*  |
| PC(16:0/22:3)  | Eosinophils    | -0.2966 | 0.0365*  |
| PC(16:0e/16:0) | MPV            | 0.2979  | 0.0356*  |
| PC(16:0e/16:0) | MCHC           | -0.2972 | 0.0361*  |
| PC(16:0e/16:0) | Monocytes%     | 0.2898  | 0.0412*  |
| PC(16:0e/16:1) | Mg             | -0.3121 | 0.0273*  |
| PC(16:0e/16:1) | P              | 0.2809  | 0.0481*  |
| PC(16:0e/18:0) | Glucose        | 0.3299  | 0.0193*  |
| PC(16:0e/18:0) | Mg             | -0.3212 | 0.0230*  |
| PC(16:0e/18:0) | CO2            | -0.3189 | 0.0349*  |
| PC(16:0e/18:0) | IBIL           | -0.2970 | 0.0362*  |
| PC(16:0e/18:0) | Albumin        | -0.2901 | 0.0410*  |
| PC(16:0e/18:1) | Glucose        | 0.4196  | 0.0024** |
| PC(16:0e/18:1) | IBIL           | -0.3868 | 0.0055** |
| PC(16:0e/18:1) | TBIL           | -0.3698 | 0.0082** |
| PC(16:0e/18:1) | Eosinophils    | -0.3393 | 0.0159*  |
| PC(16:0e/18:1) | Mg             | -0.3385 | 0.0162*  |
| PC(16:0e/18:1) | DBIL           | -0.3149 | 0.0259*  |
| PC(16:0e/18:1) | CO2            | -0.3341 | 0.0266*  |
| PC(16:0e/18:1) | HCT            | -0.2906 | 0.0407*  |
| PC(16:0e/18:1) | HGB            | -0.2803 | 0.0486*  |
| PC(16:0e/20:2) | HCT            | -0.4384 | 0.0015** |
| PC(16:0e/20:2) | HGB            | -0.4361 | 0.0015** |
| PC(16:0e/20:2) | RBC            | -0.4298 | 0.0018** |
| PC(16:0e/20:2) | Ca             | 0.4079  | 0.0033** |
| PC(16:0e/20:2) | Creatinine     | -0.4062 | 0.0034** |
| PC(16:0e/20:2) | PDW            | -0.3327 | 0.0182*  |
| PC(16:0e/20:2) | Mg             | -0.3181 | 0.0244*  |
| PC(16:0e/20:2) | WBC            | -0.3128 | 0.0270*  |
| PC(16:0e/20:2) | Neutrophils    | -0.3088 | 0.0291*  |
| PC(16:0e/20:4) | P              | 0.3972  | 0.0043** |
| PC(16:0e/20:4) | Basophils      | -0.3312 | 0.0188*  |
| PC(16:0e/20:4) | ALT            | 0.3166  | 0.0251*  |
| PC(16:0e/20:4) | Albumin        | 0.2892  | 0.0417*  |
| PC(16:0p/16:0) | P              | 0.4172  | 0.0026** |
| PC(16:0p/16:0) | Mg             | -0.2807 | 0.0483*  |
| PC(16:0p/18:0) | HCT            | -0.4439 | 0.0012** |
| PC(16:0p/18:0) | PDW            | -0.4109 | 0.0030** |
| PC(16:0p/18:0) | HGB            | -0.4040 | 0.0036** |

|                |             |         |          |
|----------------|-------------|---------|----------|
| PC(16:0p/18:0) | Glucose     | 0.3795  | 0.0066** |
| PC(16:0p/18:0) | RBC         | -0.3667 | 0.0088** |
| PC(16:0p/18:0) | Mg          | -0.3607 | 0.0101*  |
| PC(16:0p/18:0) | Eosinophils | -0.3478 | 0.0133*  |
| PC(16:0p/18:0) | TBIL        | -0.3419 | 0.0151*  |
| PC(16:0p/18:0) | DBIL        | -0.3405 | 0.0155*  |
| PC(16:0p/18:0) | IBIL        | -0.3310 | 0.0189*  |
| PC(16:0p/18:0) | Creatinine  | -0.3262 | 0.0208*  |
| PC(16:0p/18:0) | CO2         | -0.3432 | 0.0226*  |
| PC(16:0p/18:0) | Ca          | 0.2836  | 0.0459*  |
| PC(16:0p/18:3) | Neutrophils | -0.3451 | 0.0141*  |
| PC(16:0p/20:0) | HGB         | 0.2902  | 0.0409*  |
| PC(16:0p/20:0) | PDW         | 0.2850  | 0.0449*  |
| PC(16:0p/20:0) | Monocytes   | 0.2823  | 0.0470*  |
| PC(16:0p/20:1) | Creatinine  | -0.3783 | 0.0068** |
| PC(16:0p/20:1) | HGB         | -0.3654 | 0.0091** |
| PC(16:0p/20:1) | RBC         | -0.3626 | 0.0097** |
| PC(16:0p/20:1) | HCT         | -0.3470 | 0.0136*  |
| PC(16:0p/20:1) | Ca          | 0.3114  | 0.0277*  |
| PC(16:0p/20:1) | Mg          | -0.3072 | 0.0300*  |
| PC(16:0p/20:1) | Neutrophils | -0.2900 | 0.0411*  |
| PC(16:0p/20:1) | WBC         | -0.2867 | 0.0435*  |
| PC(18:0e/16:0) | Glucose     | 0.3492  | 0.0129*  |
| PC(18:0e/16:0) | CO2         | -0.3628 | 0.0155*  |
| PC(18:0e/16:0) | Mg          | -0.3191 | 0.0239*  |
| PC(18:0e/16:0) | IBIL        | -0.3158 | 0.0255*  |
| PC(18:0e/16:0) | TBIL        | -0.2792 | 0.0496*  |
| PC(18:0e/18:0) | PDW         | -0.4142 | 0.0028** |
| PC(18:0e/18:0) | HCT         | -0.3669 | 0.0088** |
| PC(18:0e/18:0) | IBIL        | -0.3612 | 0.0100*  |
| PC(18:0e/18:0) | Glucose     | 0.3557  | 0.0112*  |
| PC(18:0e/18:0) | Mg          | -0.3533 | 0.0119*  |
| PC(18:0e/18:0) | TBIL        | -0.3490 | 0.0130*  |
| PC(18:0e/18:0) | Creatinine  | -0.3360 | 0.0171*  |
| PC(18:0e/18:0) | DBIL        | -0.3231 | 0.0221*  |
| PC(18:0e/18:0) | HGB         | -0.3022 | 0.0329*  |
| PC(18:0e/18:0) | RBC         | -0.2999 | 0.0343*  |
| PC(18:0p/14:0) | Mg          | -0.3351 | 0.0174*  |
| PC(18:0p/14:0) | P           | 0.2971  | 0.0361*  |
| PC(18:0p/16:0) | Glucose     | 0.3944  | 0.0046** |
| PC(18:0p/16:0) | CO2         | -0.4007 | 0.0070** |
| PC(18:0p/16:0) | Eosinophils | -0.3739 | 0.0075** |
| PC(18:0p/16:0) | IBIL        | -0.3688 | 0.0084** |
| PC(18:0p/16:0) | TBIL        | -0.3634 | 0.0095** |

|                |              |         |           |
|----------------|--------------|---------|-----------|
| PC(18:0p/16:0) | Mg           | -0.3413 | 0.0153*   |
| PC(18:0p/16:0) | DBIL         | -0.3199 | 0.0235*   |
| PC(18:0p/16:0) | HCT          | -0.3096 | 0.0287*   |
| PC(18:0p/16:0) | HGB          | -0.3067 | 0.0303*   |
| PC(18:0p/16:0) | Eosinophils% | -0.3000 | 0.0343*   |
| PC(18:0p/18:0) | Monocytes    | 0.3441  | 0.0144*   |
| PC(18:0p/18:0) | HGB          | 0.3226  | 0.0223*   |
| PC(18:0p/18:1) | HCT          | -0.5078 | 0.0002*** |
| PC(18:0p/18:1) | Creatinine   | -0.5063 | 0.0002*** |
| PC(18:0p/18:1) | RBC          | -0.5056 | 0.0002*** |
| PC(18:0p/18:1) | HGB          | -0.5029 | 0.0002*** |
| PC(18:0p/18:1) | PDW          | -0.4599 | 0.0008*** |
| PC(18:0p/18:1) | DBIL         | -0.3803 | 0.0064**  |
| PC(18:0p/18:1) | Ca           | 0.3602  | 0.0102*   |
| PC(18:0p/18:1) | MPV          | -0.3314 | 0.0187*   |
| PC(18:0p/18:1) | WBC          | -0.3104 | 0.0282*   |
| PC(18:0p/18:1) | Neutrophils  | -0.3098 | 0.0286*   |
| PC(18:0p/18:1) | TBIL         | -0.3080 | 0.0295*   |
| PC(18:0p/18:1) | Mg           | -0.3041 | 0.0318*   |
| PC(18:0p/18:1) | LDH          | -0.2934 | 0.0386*   |
| PC(18:0p/18:1) | Albumin      | -0.2924 | 0.0394*   |
| PC(18:0p/18:1) | UA           | -0.2868 | 0.0434*   |
| PC(18:0p/18:1) | CK-MB        | -0.2854 | 0.0445*   |
| PC(18:0p/18:1) | CO2          | -0.2985 | 0.0491*   |
| PC(18:1e/16:0) | Glucose      | 0.3983  | 0.0042**  |
| PC(18:1e/16:0) | IBIL         | -0.3832 | 0.0060**  |
| PC(18:1e/16:0) | TBIL         | -0.3751 | 0.0073**  |
| PC(18:1e/16:0) | Eosinophils  | -0.3695 | 0.0083**  |
| PC(18:1e/16:0) | CO2          | -0.3765 | 0.0118*   |
| PC(18:1e/16:0) | Mg           | -0.3443 | 0.0144*   |
| PC(18:1e/16:0) | DBIL         | -0.3322 | 0.0184*   |
| PC(18:1e/16:0) | HCT          | -0.3104 | 0.0282*   |
| PC(18:1e/16:0) | HGB          | -0.3086 | 0.0292*   |
| PC(18:1e/16:0) | Eosinophils% | -0.2969 | 0.0363*   |
| PC(18:1e/18:1) | PDW          | -0.4851 | 0.0004*** |
| PC(18:1e/18:1) | HCT          | -0.4833 | 0.0004*** |
| PC(18:1e/18:1) | RBC          | -0.4328 | 0.0017**  |
| PC(18:1e/18:1) | HGB          | -0.4189 | 0.0025**  |
| PC(18:1e/18:1) | Creatinine   | -0.3947 | 0.0046**  |
| PC(18:1e/18:1) | MPV          | -0.3666 | 0.0088**  |
| PC(18:1e/18:1) | Ca           | 0.3412  | 0.0153*   |
| PC(18:1e/18:1) | ratio        | -0.3199 | 0.0235*   |
| PC(18:1e/18:1) | Neutrophils  | -0.3188 | 0.0240*   |
| PC(18:1e/18:1) | DBIL         | -0.2957 | 0.0371*   |



|                |              |         |           |
|----------------|--------------|---------|-----------|
| PC(18:1e/18:1) | WBC          | -0.2903 | 0.0408*   |
| PC(18:1e/18:1) | LDH          | -0.2896 | 0.0414*   |
| PC(18:2e/12:0) | Eosinophils  | -0.3468 | 0.0136*   |
| PC(18:2e/12:0) | Eosinophils% | -0.3403 | 0.0156*   |
| PE(16:0/18:0)  | WBC          | -0.3712 | 0.0080**  |
| PE(16:0/18:0)  | Neutrophils  | -0.3451 | 0.0141*   |
| PE(16:0/18:0)  | Monocytes    | -0.3128 | 0.0270*   |
| PE(16:0/18:0)  | ALP          | -0.2876 | 0.0428**  |
| PE(18:0/22:5)  | IBIL         | -0.4185 | 0.0025**  |
| PE(18:0/22:5)  | TBIL         | -0.4084 | 0.0032**  |
| PE(18:0/22:5)  | Monocytes    | -0.3812 | 0.0063**  |
| PE(18:0/22:5)  | Eosinophils  | -0.3530 | 0.0119*   |
| PE(18:0/22:5)  | DBIL         | -0.3514 | 0.0123*   |
| PE(18:0/22:5)  | CK.MB        | -0.3267 | 0.0206*   |
| PE(18:0/22:5)  | WBC          | -0.3248 | 0.0214*   |
| PE(18:0/22:5)  | Neutrophils  | -0.3161 | 0.0253*   |
| PE(18:0/22:5)  | RDW          | 0.3142  | 0.0263*   |
| PE(18:0/22:5)  | RBC          | -0.3037 | 0.0320*   |
| PE(18:0/22:5)  | Albumin      | -0.2895 | 0.0414*   |
| PE(18:0/22:5)  | HGB          | -0.2862 | 0.0439*   |
| PE(18:0/22:5)  | FIB          | 0.3111  | 0.0449*   |
| PI(16:0/20:3)  | RBC          | -0.3926 | 0.0048**  |
| PI(16:0/20:3)  | HGB          | -0.3561 | 0.0111*   |
| PI(16:0/20:3)  | HCT          | -0.3082 | 0.0294*   |
| PI(16:0/20:3)  | Eosinophils  | -0.2860 | 0.0441*   |
| PI(16:0/20:3)  | IBIL         | -0.3401 | 0.0157*   |
| PI(16:0/20:3)  | TBIL         | -0.3369 | 0.0167*   |
| PI(16:0/20:3)  | RDW          | 0.3065  | 0.0304*   |
| PI(16:0/20:3)  | Eosinophils  | -0.2972 | 0.0361*   |
| PI(16:0/20:3)  | DBIL         | -0.2967 | 0.0364*   |
| SM(d18:1/18:2) | HCT          | -0.5120 | 0.0001*** |
| SM(d18:1/18:2) | RBC          | -0.4855 | 0.0004*** |
| SM(d18:1/18:2) | Creatinine   | -0.4726 | 0.0005*** |
| SM(d18:1/18:2) | HGB          | -0.4537 | 0.0009*** |
| SM(d18:1/18:2) | Ca           | 0.4357  | 0.0016**  |
| SM(d18:1/18:2) | PDW          | -0.4294 | 0.0019**  |
| SM(d18:1/18:2) | Neutrophils  | -0.3374 | 0.0166*   |
| SM(d18:1/18:2) | WBC          | -0.3099 | 0.0285*   |
| SM(d18:1/18:3) | HCT          | -0.3610 | 0.0100*   |
| SM(d18:1/18:3) | Glucose      | 0.3527  | 0.0120*   |
| SM(d18:1/18:3) | WBC          | -0.2998 | 0.0344*   |
| SM(d18:1/18:3) | TT           | 0.3206  | 0.0384*   |
| SM(d18:1/18:3) | Mg           | -0.2923 | 0.0394*   |
| SM(d18:1/18:3) | Creatinine   | -0.2825 | 0.0469*   |

|                |             |         |          |
|----------------|-------------|---------|----------|
| SM(d18:1/18:3) | Lymphocytes | -0.2812 | 0.0479*  |
| SM(d18:1/20:1) | MCHC        | -0.3072 | 0.0300*  |
| SM(d18:1/20:1) | Monocytes%  | 0.2818  | 0.0474*  |
| SM(d18:1/20:4) | Neutrophils | -0.3604 | 0.0101*  |
| SM(d18:1/20:5) | HCT         | -0.3247 | 0.0214*  |
| SM(d18:1/20:5) | WBC         | -0.2886 | 0.0421*  |
| SM(d18:1/20:5) | Neutrophils | -0.2843 | 0.0454*  |
| SM(d18:1/22:0) | MCV         | 0.3142  | 0.0263*  |
| SM(d18:1/22:0) | RBC         | -0.3138 | 0.0265*  |
| SM(d18:1/22:0) | MCHC        | -0.2919 | 0.0397*  |
| SM(d18:1/22:0) | r.GT        | -0.2918 | 0.0398*  |
| SM(d18:1/22:0) | HGB         | -0.4025 | 0.0038** |
| SM(d18:1/22:0) | HCT         | -0.3476 | 0.0134*  |
| SM(d18:1/22:0) | RBC         | -0.3399 | 0.0157*  |
| SM(d18:1/22:0) | Eosinophils | -0.3342 | 0.0177*  |
| SM(d18:1/22:0) | IBIL        | -0.3315 | 0.0187*  |
| SM(d18:1/22:0) | TBIL        | -0.3280 | 0.0201*  |
| SM(d18:1/22:0) | Monocytes   | -0.3232 | 0.0221*  |
| SM(d18:1/22:0) | DBIL        | -0.3069 | 0.0302*  |
| SM(d18:1/22:3) | TBIL        | -0.4295 | 0.0019** |
| SM(d18:1/22:3) | IBIL        | -0.4291 | 0.0019** |
| SM(d18:1/22:3) | DBIL        | -0.3829 | 0.0061** |
| SM(d18:1/22:3) | HGB         | -0.3635 | 0.0095** |
| SM(d18:1/22:3) | Eosinophils | -0.3294 | 0.0195*  |
| SM(d18:1/22:3) | HCT         | -0.3035 | 0.0321*  |
| SM(d18:1/22:3) | RBC         | -0.2879 | 0.0426*  |
| SM(d18:1/22:4) | Neutrophils | -0.3343 | 0.0177*  |
| SM(d18:1/22:4) | MCHC        | -0.3096 | 0.0287*  |
| TAG(48:1)      | MPV         | 0.3640  | 0.0094** |
| TAG(48:1)      | PDW         | 0.3291  | 0.0196*  |
| TAG(48:1)      | Creatinine  | 0.3084  | 0.0294*  |
| TAG(50:2)      | Eosinophils | 0.2930  | 0.0389*  |

**Abbreviation:** ALP, alkaline phosphatase; ALT, alanine aminotransferase; APTT, activated partial thromboplastin time; AST, aspartate aminotransferase; BUN, blood urea nitrogen; Ca, calcium; CK-MB, creatine kinase-myocardial band; CRP, C-reactive protein; DAG, diacylglycerol; DBIL, direct bilirubin; FIB, FFA, free fatty acid; fibrinogen; HCs, healthy controls; IBIL, indirect bilirubin; INR, international normalized ratio; LDH, lactate dehydrogenase; LPC, lysoPhosphatidylcholine; LPE, lysoPhosphatidylethanolamine; M, moderate; MCH, mean corpuscular hemoglobin; MCHC, mean corpuscular hemoglobin concentration; MCV, mean corpuscular volume; Mg, magnesium; P, phosphorus; PC,

phosphatidylcholine; PCT, plateletocrit; PDW, platelet distribution width; PE, phosphatidylethanolamine; PT, prothrombin time; PI, phosphatidylinositol; RAs, recovered asymptomatic patients; RBC, red blood cell; RDW, red blood cell volume distribution width; RMs, recovered moderate patients; RSs, recovered critical and severe patients; S, critical and severe; SM, sphingomyelin; TAG, triacylglycerol; TBIL, total bilirubin; TT, thrombin time; UA, urine acid; WBC, white blood cell;  $\alpha$ -HBDH,  $\alpha$ -hydroxybutyrate dehydrogenase;  $\gamma$ -GT,  $\gamma$ -glutamyl transpeptidase; Statistical significance was set at 2-sided. \* $p < 0.05$ , \*\* $p < 0.01$ , \*\*\* $p < 0.001$ .

**Table S9. Relationship between the differential lipids and clinical indices in RAs, RMs, RSs, and HCs.**

| Lipids         | Clinical indices | HC                      |           | RA                      |         | RM                      |         | RS                      |         |
|----------------|------------------|-------------------------|-----------|-------------------------|---------|-------------------------|---------|-------------------------|---------|
|                |                  | Correlation coefficient | p-value   | Correlation coefficient | p-value | Correlation coefficient | p-value | Correlation coefficient | p-value |
| DAG(14:0/16:0) | Neutrophils      | -0.5101                 | 0.0364*   | 0.1228                  | NS      | 0.1673                  | NS      | 0.3231                  | NS      |
| DAG(14:0/18:0) | Neutrophils      | -0.5506                 | 0.0220*   | -0.0402                 | NS      | -0.0150                 | NS      | 0.1788                  | NS      |
| DAG(14:0/18:2) | APTT             | -0.7204                 | 0.0011*** | -0.4143                 | NS      | -0.1769                 | NS      | 0.2441                  | NS      |
| DAG(14:0/18:2) | P                | -0.5849                 | 0.0137*   | -0.1299                 | NS      | 0.1842                  | NS      | 0.0215                  | NS      |
| DAG(14:0/18:2) | CO2              | -0.5110                 | 0.0361*   | 0.0958                  | NS      | -0.2848                 | NS      | -0.0080                 | NS      |
| DAG(16:0/16:0) | UA               | 0.6916                  | 0.0021*** | -0.2157                 | NS      | -0.2555                 | NS      | -0.1287                 | NS      |
| DAG(16:0/16:1) | WBC              | -0.5294                 | 0.0289*   | 0.0836                  | NS      | 0.0277                  | NS      | 0.4161                  | 0.0160* |
| DAG(16:0/16:1) | Neutrophils      | -0.4868                 | 0.0475*   | 0.0857                  | NS      | 0.0137                  | NS      | 0.3953                  | 0.0228* |
| DAG(16:1/16:1) | BUN              | -0.5064                 | 0.0380*   | 0.0299                  | NS      | -0.2663                 | NS      | -0.0792                 | NS      |
| DAG(16:1/18:0) | Basophils        | 0.5083                  | 0.0372*   | -0.1666                 | NS      | -0.1060                 | NS      | 0.0340                  | NS      |
| DAG(16:1/18:0) | Neutrophils      | 0.5171                  | 0.0335*   | -0.0200                 | NS      | -0.1232                 | NS      | 0.1812                  | NS      |
| DAG(16:1/18:0) | Monocytes        | 0.5477                  | 0.0229*   | -0.3617                 | NS      | -0.1005                 | NS      | 0.2931                  | NS      |
| DAG(16:1/18:0) | Creatinine       | 0.5511                  | 0.0219*   | -0.4099                 | NS      | -0.0430                 | NS      | -0.1406                 | NS      |
| DAG(16:1/18:0) | CRP              | 0.5870                  | 0.0132*   | -0.2666                 | NS      | -0.2638                 | NS      | -0.3109                 | NS      |
| DAG(16:1/18:0) | PLT              | 0.6349                  | 0.0062*** | -0.0426                 | NS      | 0.0580                  | NS      | -0.2062                 | NS      |
| DAG(16:1/18:0) | WBC              | 0.6527                  | 0.0045*** | -0.1503                 | NS      | -0.1551                 | NS      | 0.1827                  | NS      |
| DAG(18:1/20:0) | TT               | -0.6416                 | 0.0055*** | -0.0889                 | NS      | -0.2281                 | NS      | 0.0804                  | NS      |
| DAG(18:1/20:0) | IBIL             | 0.5049                  | 0.0387*   | -0.3540                 | NS      | 0.0439                  | NS      | 0.0408                  | NS      |
| DAG(18:1/20:0) | TBIL             | 0.5245                  | 0.0307*   | -0.3332                 | NS      | 0.0168                  | NS      | -0.0125                 | NS      |
| DAG(18:1/20:0) | DBIL             | 0.5521                  | 0.0216*   | -0.3223                 | NS      | -0.0253                 | NS      | -0.0700                 | NS      |
| DAG(18:1/20:0) | r-GT             | 0.5584                  | 0.0198*   | -0.0775                 | NS      | 0.1083                  | NS      | 0.1297                  | NS      |

|                    |             |         |           |         |    |         |         |         |         |
|--------------------|-------------|---------|-----------|---------|----|---------|---------|---------|---------|
| DAG(18:1/20:0)     | AST         | 0.6252  | 0.0073*** | -0.4311 | NS | 0.2582  | NS      | 0.0188  | NS      |
| DAG(18:1/20:0)     | ALT         | 0.6491  | 0.0048*** | -0.3440 | NS | 0.1776  | NS      | -0.1382 | NS      |
| FFA(14:0)          | FIB         | 0.5098  | 0.0366*   | -0.1541 | NS | -0.0881 | NS      | 0.4204  | 0.0364* |
| FFA(16:2)          | FIB         | -0.5319 | 0.0280*   | 0.1417  | NS | 0.0138  | NS      | 0.0355  | NS      |
| FFA(16:2)          | Mg          | -0.5296 | 0.0288*   | -0.2749 | NS | -0.2186 | NS      | -0.1315 | NS      |
| FFA(16:2)          | HCT         | 0.5015  | 0.0403*   | 0.1538  | NS | 0.2662  | NS      | 0.1299  | NS      |
| FFA(16:2)          | BUN         | 0.5028  | 0.0397*   | -0.2157 | NS | -0.0466 | NS      | 0.0724  | NS      |
| FFA(16:2)          | HGB         | 0.5690  | 0.0171*   | 0.1664  | NS | 0.1792  | NS      | -0.0141 | NS      |
| FFA(16:2)          | RBC         | 0.5849  | 0.0137*   | 0.0320  | NS | 0.2605  | NS      | 0.0495  | NS      |
| FFA(20:3)          | FIB         | -0.5319 | 0.0280*   | 0.2347  | NS | 0.2181  | NS      | -0.3538 | NS      |
| FFA(22:3)          | WBC         | -0.5172 | 0.0335*   | -0.1352 | NS | -0.3158 | NS      | 0.3546  | 0.0429* |
| FFA(22:3)          | Mg          | -0.5037 | 0.0393*   | -0.0344 | NS | -0.0949 | NS      | 0.0970  | NS      |
| FFA(22:5)          | Ca          | 0.5963  | 0.0115*   | 0.4225  | NS | 0.1634  | NS      | 0.3085  | NS      |
| HexCer(d18:1/22:1) | IBIL        | -0.5335 | 0.0274*   | 0.0991  | NS | -0.2094 | NS      | -0.1287 | NS      |
| HexCer(d18:1/22:1) | TBIL        | -0.5311 | 0.0283*   | 0.1491  | NS | -0.2118 | NS      | -0.1573 | NS      |
| HexCer(d18:1/22:1) | AST         | -0.4835 | 0.0493*   | 0.1042  | NS | -0.1125 | NS      | -0.3248 | NS      |
| HexCer(d18:1/22:1) | PT          | 0.5493  | 0.0224*   | 0.2992  | NS | 0.0989  | NS      | 0.3883  | NS      |
| HexCer(d18:1/22:1) | INR         | 0.5493  | 0.0224*   | 0.2992  | NS | 0.0989  | NS      | 0.3883  | NS      |
| HexCer(d18:1/22:1) | Lymphocytes | 0.5612  | 0.0191*   | -0.0423 | NS | 0.3613  | 0.0422* | -0.1101 | NS      |
| HexCer(d18:1/22:1) | PLT         | 0.5906  | 0.0125*   | -0.1539 | NS | 0.3033  | NS      | -0.1354 | NS      |
| LPC(15:0)          | r-GT        | -0.7085 | 0.0015*** | 0.0981  | NS | -0.1995 | NS      | -0.2247 | NS      |
| LPC(15:0)          | ALT         | -0.7043 | 0.0016*** | 0.1281  | NS | -0.2569 | NS      | -0.0947 | NS      |
| LPC(15:0)          | Monocytes   | -0.6552 | 0.0043*** | -0.0176 | NS | 0.1702  | NS      | -0.2650 | NS      |
| LPC(15:0)          | UA          | -0.5028 | 0.0397*   | 0.1785  | NS | -0.1287 | NS      | -0.1715 | NS      |
| LPC(15:0)          | DBIL        | -0.4969 | 0.0424*   | -0.2924 | NS | -0.2024 | NS      | -0.3958 | 0.0226* |
| LPC(15:0)          | WBC         | -0.4853 | 0.0483*   | 0.0588  | NS | 0.2244  | NS      | -0.2637 | NS      |

|           |                |         |           |         |    |         |    |         |         |
|-----------|----------------|---------|-----------|---------|----|---------|----|---------|---------|
| LPC(16:0) | ALT            | -0.7239 | 0.0010*** | 0.1839  | NS | -0.1860 | NS | 0.1046  | NS      |
| LPC(16:0) | Monocytes      | -0.6404 | 0.0056*** | 0.0643  | NS | 0.0178  | NS | -0.1543 | NS      |
| LPC(16:0) | DBIL           | -0.6160 | 0.0085*** | -0.2696 | NS | -0.1404 | NS | -0.1880 | NS      |
| LPC(16:0) | Eosinophils    | -0.6053 | 0.0100*   | -0.0021 | NS | 0.2673  | NS | -0.2182 | NS      |
| LPC(16:0) | r-GT           | -0.6039 | 0.0102*   | 0.2552  | NS | -0.0583 | NS | 0.1175  | NS      |
| LPC(16:0) | LDH            | -0.5172 | 0.0335*   | -0.4109 | NS | -0.2228 | NS | 0.1281  | NS      |
| LPC(16:0) | AST            | -0.5095 | 0.0367*   | 0.1130  | NS | -0.2403 | NS | 0.0224  | NS      |
| LPC(16:0) | TBIL           | -0.5074 | 0.0376*   | -0.3197 | NS | -0.0599 | NS | -0.2182 | NS      |
| LPC(16:0) | CO2            | -0.4880 | 0.0469*   | -0.1932 | NS | 0.0541  | NS | -0.0917 | NS      |
| LPC(16:1) | Monocytes      | -0.6611 | 0.0039**  | 0.1172  | NS | -0.0872 | NS | -0.0397 | NS      |
| LPC(16:1) | ALT            | -0.6464 | 0.0050**  | 0.4442  | NS | -0.1058 | NS | -0.0566 | NS      |
| LPC(16:1) | LDH            | -0.5947 | 0.0118*   | -0.3397 | NS | -0.3218 | NS | 0.0383  | NS      |
| LPC(16:1) | Eosinophils    | -0.5700 | 0.0169*   | 0.0901  | NS | 0.2575  | NS | -0.2071 | NS      |
| LPC(16:1) | Neutrophils    | -0.5190 | 0.0328*   | 0.2363  | NS | -0.0224 | NS | -0.0127 | NS      |
| LPC(16:1) | DBIL           | -0.5107 | 0.0362*   | -0.2469 | NS | -0.1079 | NS | -0.3697 | 0.0342* |
| LPC(16:1) | RDW            | 0.5531  | 0.0213*   | 0.0455  | NS | -0.0619 | NS | 0.1916  | NS      |
| LPC(18:0) | Monocytes      | -0.5765 | 0.0154*   | 0.0259  | NS | 0.0667  | NS | -0.2464 | NS      |
| LPC(18:0) | DBIL           | -0.5448 | 0.0237*   | -0.3512 | NS | -0.1164 | NS | -0.2671 | NS      |
| LPC(18:0) | r-GT           | -0.5154 | 0.0342*   | 0.1746  | NS | -0.1571 | NS | -0.0214 | NS      |
| LPC(18:0) | ALT            | -0.5092 | 0.0368*   | 0.1663  | NS | -0.1875 | NS | 0.0109  | NS      |
| LPC(18:0) | Neutrophils    | -0.4917 | 0.0450*   | 0.2652  | NS | 0.0086  | NS | -0.0079 | NS      |
| LPC(18:0) | $\alpha$ -HBDH | 0.4862  | 0.0478*   | 0.0539  | NS | -0.0675 | NS | 0.1602  | NS      |
| LPC(18:1) | Creatinine     | -0.7060 | 0.0015**  | -0.0787 | NS | -0.2035 | NS | -0.1609 | NS      |
| LPC(18:1) | ALT            | -0.5696 | 0.0170*   | 0.1052  | NS | -0.2643 | NS | -0.0367 | NS      |
| LPC(18:1) | $\alpha$ -HBDH | 0.5636  | 0.0185*   | -0.2202 | NS | -0.0703 | NS | -0.0184 | NS      |
| LPC(20:0) | Neutrophils    | -0.6033 | 0.0103*   | -0.2074 | NS | 0.0713  | NS | -0.1257 | NS      |

|             |                |         |          |         |           |         |         |         |         |
|-------------|----------------|---------|----------|---------|-----------|---------|---------|---------|---------|
| LPC(20:0)   | DBIL           | -0.5706 | 0.0168*  | -0.0579 | NS        | -0.2101 | NS      | -0.0826 | NS      |
| LPC(20:0)   | r-GT           | -0.5461 | 0.0233*  | 0.1612  | NS        | 0.0046  | NS      | 0.1800  | NS      |
| LPC(20:0)   | Creatinine     | -0.5074 | 0.0376*  | 0.0382  | NS        | 0.0271  | NS      | -0.1487 | NS      |
| LPC(20:0)   | TBIL           | -0.4877 | 0.0470*  | -0.1924 | NS        | -0.0222 | NS      | 0.0762  | NS      |
| LPC(20:0)   | $\alpha$ -HBDH | 0.5451  | 0.0236*  | -0.2040 | NS        | -0.0680 | NS      | -0.0189 | NS      |
| LPC(22:1)   | Monocytes      | -0.6491 | 0.0048** | -0.0933 | NS        | 0.1687  | NS      | -0.2015 | NS      |
| LPC(22:1)   | Neutrophils    | -0.5874 | 0.0132*  | 0.0237  | NS        | -0.0328 | NS      | -0.1889 | NS      |
| LPC(22:1)   | CRP            | -0.5457 | 0.0235*  | 0.0424  | NS        | 0.0068  | NS      | 0.1784  | NS      |
| LPC(22:1)   | WBC            | -0.5074 | 0.0376*  | -0.1352 | NS        | 0.0711  | NS      | -0.3811 | 0.0286* |
| LPC(22:1)   | HGB            | -0.5003 | 0.0408*  | 0.0589  | NS        | -0.1463 | NS      | -0.1282 | NS      |
| LPC(22:1)   | r-GT           | -0.4932 | 0.0442*  | 0.1333  | NS        | -0.1789 | NS      | -0.1108 | NS      |
| LPC(22:1)   | ALT            | -0.4834 | 0.0493*  | 0.1467  | NS        | 0.0250  | NS      | -0.0884 | NS      |
| LPC(22:1)   | $\alpha$ -HBDH | 0.5169  | 0.0336*  | -0.0715 | NS        | -0.1135 | NS      | -0.0385 | NS      |
| LPC(O/16:0) | r-GT           | -0.6568 | 0.0042** | 0.1095  | NS        | -0.1440 | NS      | -0.1907 | NS      |
| LPC(O/16:0) | ALT            | -0.6540 | 0.0044** | 0.1529  | NS        | -0.2599 | NS      | -0.0668 | NS      |
| LPC(O/16:0) | Monocytes      | -0.6331 | 0.0064** | 0.0145  | NS        | 0.1719  | NS      | -0.3236 | NS      |
| LPC(O/16:0) | Creatinine     | -0.4975 | 0.0421*  | 0.2900  | NS        | -0.2068 | NS      | -0.3939 | 0.0233* |
| LPC(O/16:0) | UA             | -0.4905 | 0.0456*  | 0.1434  | NS        | -0.1070 | NS      | -0.1875 | NS      |
| LPC(O/16:0) | CRP            | -0.4893 | 0.0462*  | 0.2494  | NS        | 0.1157  | NS      | 0.0650  | NS      |
| LPC(O/18:0) | ALT            | -0.7006 | 0.0017** | 0.1271  | NS        | -0.2804 | NS      | -0.1911 | NS      |
| LPC(O/18:0) | DBIL           | -0.6564 | 0.0042** | -0.2707 | NS        | -0.2723 | NS      | -0.2683 | NS      |
| LPC(O/18:0) | Monocytes      | -0.5987 | 0.0111*  | -0.0881 | NS        | 0.0771  | NS      | -0.2135 | NS      |
| LPC(O/18:0) | AST            | -0.5908 | 0.0125*  | -0.0321 | NS        | -0.4095 | 0.0199* | -0.3852 | 0.0269* |
| LPC(O/18:0) | r-GT           | -0.5658 | 0.0179*  | 0.0341  | NS        | -0.0594 | NS      | -0.3417 | NS      |
| LPC(O/18:0) | TBIL           | -0.5319 | 0.0280*  | -0.4004 | NS        | -0.1126 | NS      | -0.2316 | NS      |
| LPC(O/18:0) | LDH            | -0.4877 | 0.0470*  | -0.7475 | 0.0004*** | -0.3263 | NS      | -0.2124 | NS      |

|           |                |         |           |         |          |         |    |         |          |
|-----------|----------------|---------|-----------|---------|----------|---------|----|---------|----------|
| LPE(14:0) | ALT            | -0.6074 | 0.0097**  | 0.5961  | 0.0090** | -0.1502 | NS | 0.2915  | NS       |
| LPE(14:0) | AST            | -0.5255 | 0.0303*   | 0.3782  | NS       | -0.2213 | NS | 0.1893  | NS       |
| LPE(14:0) | Monocytes      | -0.4954 | 0.0432*   | 0.4894  | 0.0393*  | 0.0059  | NS | -0.0755 | NS       |
| LPE(20:3) | DBIL           | -0.5914 | 0.0124*   | -0.1756 | NS       | -0.2656 | NS | -0.5148 | 0.0022** |
| LPE(20:3) | Eosinophils    | -0.5770 | 0.0153*   | -0.0186 | NS       | 0.2869  | NS | -0.2019 | NS       |
| LPE(20:3) | ALT            | -0.5583 | 0.0199*   | 0.1798  | NS       | -0.2035 | NS | 0.0030  | NS       |
| LPE(20:3) | LDH            | -0.5490 | 0.0225*   | -0.3996 | NS       | -0.2529 | NS | -0.1144 | NS       |
| LPE(20:3) | Monocytes      | -0.5347 | 0.0270*   | -0.0550 | NS       | -0.0369 | NS | -0.2772 | NS       |
| LPE(20:3) | TBIL           | -0.5147 | 0.0345*   | -0.2587 | NS       | -0.1263 | NS | -0.4713 | 0.0056** |
| LPE(20:4) | ALT            | -0.7387 | 0.0007*** | 0.1663  | NS       | -0.1449 | NS | 0.0045  | NS       |
| LPE(20:4) | Monocytes      | -0.6466 | 0.0050**  | -0.1026 | NS       | 0.0187  | NS | -0.2123 | NS       |
| LPE(20:4) | LDH            | -0.5686 | 0.0172*   | -0.3975 | NS       | -0.2127 | NS | -0.0314 | NS       |
| LPE(20:4) | DBIL           | -0.5656 | 0.0180*   | -0.1839 | NS       | -0.1206 | NS | -0.5302 | 0.0015** |
| LPE(20:4) | Eosinophils    | -0.5402 | 0.0252*   | -0.1367 | NS       | 0.2888  | NS | -0.1152 | NS       |
| LPE(20:4) | r-GT           | -0.5375 | 0.0261*   | 0.2252  | NS       | 0.0015  | NS | -0.0526 | NS       |
| LPE(20:4) | AST            | -0.5059 | 0.0383*   | 0.1306  | NS       | -0.2387 | NS | -0.1019 | NS       |
| LPE(20:4) | $\alpha$ -HBDH | 0.5107  | 0.0362*   | 0.0352  | NS       | 0.0193  | NS | 0.0990  | NS       |
| LPE(20:5) | DBIL           | -0.6748 | 0.0030**  | -0.2273 | NS       | -0.2011 | NS | 0.0475  | NS       |
| LPE(20:5) | ALT            | -0.6331 | 0.0064**  | 0.2614  | NS       | -0.1146 | NS | 0.0301  | NS       |
| LPE(20:5) | Monocytes      | -0.5814 | 0.0144*   | -0.0301 | NS       | 0.0147  | NS | 0.0596  | NS       |
| LPE(20:5) | AST            | -0.5723 | 0.0164*   | 0.1959  | NS       | -0.2891 | NS | 0.0883  | NS       |
| LPE(20:5) | TBIL           | -0.5515 | 0.0217*   | -0.2711 | NS       | -0.0632 | NS | -0.1063 | NS       |
| LPE(20:5) | r-GT           | -0.5338 | 0.0273*   | 0.2851  | NS       | 0.0270  | NS | 0.0687  | NS       |
| LPE(20:5) | LDH            | -0.5294 | 0.0289*   | -0.3882 | NS       | -0.3123 | NS | 0.2301  | NS       |
| LPE(20:5) | Eosinophils    | -0.4923 | 0.0447*   | -0.0684 | NS       | 0.3024  | NS | -0.0583 | NS       |
| LPE(20:5) | IBIL           | -0.4902 | 0.0458    | -0.2136 | NS       | -0.0125 | NS | -0.1951 | NS       |



|               |                |         |           |         |          |         |          |         |         |
|---------------|----------------|---------|-----------|---------|----------|---------|----------|---------|---------|
| LPE(22:6)     | Monocytes      | -0.5372 | 0.0262*   | -0.0829 | NS       | 0.0419  | NS       | -0.3104 | NS      |
| LPE(22:6)     | r-GT           | -0.4994 | 0.0413*   | 0.2789  | NS       | -0.1355 | NS       | -0.0137 | NS      |
| LPE(22:6)     | $\alpha$ -HBDH | 0.4886  | 0.0466*   | 0.0963  | NS       | 0.0033  | NS       | 0.2188  | NS      |
| MAG(22:5)     | BUN            | -0.5297 | 0.0287*   | 0.2343  | NS       | -0.0530 | NS       | 0.1315  | NS      |
| MAG(22:5)     | TT             | -0.5296 | 0.0288*   | -0.0558 | NS       | 0.0669  | NS       | -0.1230 | NS      |
| MAG(22:5)     | AST            | 0.5120  | 0.0356*   | -0.1202 | NS       | 0.0322  | NS       | -0.0633 | NS      |
| MAG(22:5)     | FIB            | 0.5882  | 0.0130*   | 0.2823  | NS       | 0.0299  | NS       | 0.2355  | NS      |
| PA(16:0/18:0) | HCT            | -0.4896 | 0.0461*   | 0.2695  | NS       | 0.1331  | NS       | -0.1247 | NS      |
| PC(14:0/16:0) | Monocytes      | -0.5950 | 0.0118*   | 0.2644  | NS       | 0.1388  | NS       | -0.0701 | NS      |
| PC(14:0/16:0) | CRP            | -0.5469 | 0.0231*   | 0.3187  | NS       | 0.2505  | NS       | -0.0354 | NS      |
| PC(14:0/16:0) | Eosinophils    | -0.5095 | 0.0367*   | -0.0031 | NS       | 0.4621  | 0.0077** | -0.0282 | NS      |
| PC(16:0/18:0) | Monocytes      | -0.7314 | 0.0008*** | -0.3961 | NS       | 0.0130  | NS       | -0.1778 | NS      |
| PC(16:0/18:0) | DBIL           | -0.6196 | 0.0080**  | -0.4514 | NS       | -0.0527 | NS       | -0.1765 | NS      |
| PC(16:0/18:0) | AST            | -0.6055 | 0.0100*   | -0.4415 | NS       | 0.2762  | NS       | -0.1298 | NS      |
| PC(16:0/18:0) | Neutrophils    | -0.5776 | 0.0152*   | -0.1992 | NS       | 0.0092  | NS       | -0.3583 | 0.0406* |
| PC(16:0/18:0) | ALT            | -0.5546 | 0.0209*   | -0.5124 | 0.0297*  | 0.0064  | NS       | -0.0766 | NS      |
| PC(16:0/18:0) | TBIL           | -0.5343 | 0.0271*   | -0.5618 | 0.0152*  | -0.0218 | NS       | -0.2055 | NS      |
| PC(16:0/18:0) | r-GT           | -0.5277 | 0.0295*   | -0.1839 | NS       | 0.0561  | NS       | -0.1178 | NS      |
| PC(16:0/18:0) | WBC            | -0.4926 | 0.0445*   | -0.3251 | NS       | 0.0288  | NS       | -0.3105 | NS      |
| PC(16:0/18:0) | CO2            | -0.4856 | 0.0482*   | -0.0031 | NS       | -0.1155 | NS       | 0.3850  | 0.0473* |
| PC(16:0/18:0) | IBIL           | -0.4853 | 0.0483*   | -0.6244 | 0.0056** | 0.0303  | NS       | -0.2611 | NS      |
| PC(16:0/18:0) | $\alpha$ -HBDH | 0.5255  | 0.0303*   | -0.1657 | NS       | 0.1123  | NS       | 0.2107  | NS      |
| PC(16:0/18:0) | RDW            | 0.6317  | 0.0065**  | -0.0528 | NS       | -0.0605 | NS       | 0.1897  | NS      |
| PC(16:0/20:0) | WBC            | 0.4853  | 0.0483*   | 0.1765  | NS       | 0.1716  | NS       | -0.1126 | NS      |
| PC(16:0/20:0) | Mg             | 0.5111  | 0.0360*   | 0.0062  | NS       | -0.1229 | NS       | -0.0748 | NS      |
| PC(16:0/20:3) | Albumin        | 0.6021  | 0.0105*   | 0.4058  | NS       | -0.0640 | NS       | 0.0855  | NS      |

|                |             |         |           |         |         |         |    |         |         |
|----------------|-------------|---------|-----------|---------|---------|---------|----|---------|---------|
| PC(16:0/22:3)  | RBC         | -0.6658 | 0.0035**  | -0.2219 | NS      | 0.2541  | NS | 0.2584  | NS      |
| PC(16:0/22:3)  | ALT         | -0.5374 | 0.0261*   | -0.3481 | NS      | 0.0376  | NS | 0.0780  | NS      |
| PC(16:0/22:3)  | Glucose     | -0.5089 | 0.0370*   | -0.1662 | NS      | 0.0824  | NS | 0.3497  | 0.0461* |
| PC(16:0/22:3)  | HGB         | -0.5089 | 0.0370*   | -0.3276 | NS      | 0.1511  | NS | 0.2196  | NS      |
| PC(16:0/22:3)  | HCT         | -0.4868 | 0.0475*   | -0.3148 | NS      | 0.2456  | NS | 0.1683  | NS      |
| PC(16:0/22:3)  | Mg          | 0.6798  | 0.0027**  | 0.2978  | NS      | 0.0102  | NS | -0.0708 | NS      |
| PC(16:0e/16:0) | Neutrophils | -0.5739 | 0.0160*   | 0.0918  | NS      | 0.1751  | NS | -0.0045 | NS      |
| PC(16:0e/18:0) | DBIL        | -0.6344 | 0.0062**  | -0.3378 | NS      | -0.2745 | NS | -0.0035 | NS      |
| PC(16:0e/18:0) | ALT         | -0.6123 | 0.0090**  | 0.0599  | NS      | -0.1289 | NS | -0.0174 | NS      |
| PC(16:0e/18:0) | AST         | -0.5662 | 0.0178*   | -0.1699 | NS      | -0.3272 | NS | -0.0236 | NS      |
| PC(16:0e/18:0) | TBIL        | -0.5368 | 0.0263*   | -0.4904 | 0.0388* | -0.1861 | NS | -0.0953 | NS      |
| PC(16:0e/18:0) | r-GT        | -0.4957 | 0.0430*   | -0.0775 | NS      | 0.0370  | NS | -0.0962 | NS      |
| PC(16:0e/18:0) | IBIL        | -0.4926 | 0.0445*   | -0.4964 | 0.0361* | -0.1538 | NS | -0.1362 | NS      |
| PC(16:0e/18:0) | PT          | 0.6183  | 0.0082**  | -0.1018 | NS      | 0.1875  | NS | 0.1874  | NS      |
| PC(16:0e/18:0) | INR         | 0.6183  | 0.0082**  | -0.1018 | NS      | 0.1875  | NS | 0.1874  | NS      |
| PC(16:0e/20:2) | Ca          | 0.5656  | 0.0180*   | -0.2448 | NS      | 0.2572  | NS | 0.3188  | NS      |
| PC(16:0e/20:4) | PT          | 0.6009  | 0.0107*   | -0.0457 | NS      | 0.0517  | NS | -0.0004 | NS      |
| PC(16:0e/20:4) | INR         | 0.6009  | 0.0107*   | -0.0457 | NS      | 0.0517  | NS | -0.0004 | NS      |
| PC(16:0p/16:0) | APTT        | 0.5052  | 0.0386*   | -0.0196 | NS      | -0.1128 | NS | -0.1559 | NS      |
| PC(16:0p/16:0) | PT          | 0.5090  | 0.0369*   | -0.1817 | NS      | -0.1361 | NS | 0.2380  | NS      |
| PC(16:0p/16:0) | INR         | 0.5090  | 0.0369*   | -0.1817 | NS      | -0.1361 | NS | 0.2380  | NS      |
| PC(16:0p/18:0) | Eosinophils | -0.5807 | 0.0145*   | 0.0818  | NS      | 0.2919  | NS | -0.0915 | NS      |
| PC(16:0p/18:0) | ALT         | -0.5558 | 0.0205**  | 0.4339  | NS      | -0.1230 | NS | 0.1461  | NS      |
| PC(16:0p/18:1) | WBC         | -0.7598 | 0.0004*** | 0.0010  | NS      | -0.0328 | NS | 0.3072  | NS      |
| PC(16:0p/18:1) | Monocytes   | -0.6183 | 0.0082**  | 0.1649  | NS      | 0.1105  | NS | 0.1661  | NS      |
| PC(16:0p/18:1) | Lymphocytes | -0.6021 | 0.0105*   | 0.0464  | NS      | -0.1441 | NS | 0.0211  | NS      |

|                |             |         |          |         |    |         |         |         |         |
|----------------|-------------|---------|----------|---------|----|---------|---------|---------|---------|
| PC(16:0p/18:1) | TT          | 0.5874  | 0.0132*  | 0.2253  | NS | -0.1233 | NS      | 0.0541  | NS      |
| PC(16:0p/22:6) | DBIL        | -0.7239 | 0.0010** | 0.0207  | NS | -0.1019 | NS      | -0.0381 | NS      |
| PC(16:0p/22:6) | TBIL        | -0.6985 | 0.0018** | -0.0911 | NS | -0.1749 | NS      | -0.2005 | NS      |
| PC(16:0p/22:6) | ALT         | -0.6883 | 0.0023** | 0.0640  | NS | -0.0850 | NS      | 0.1250  | NS      |
| PC(16:0p/22:6) | IBIL        | -0.6544 | 0.0044** | -0.0774 | NS | -0.1843 | NS      | -0.2828 | NS      |
| PC(16:0p/22:6) | AST         | -0.6031 | 0.0104*  | -0.0238 | NS | -0.2079 | NS      | 0.0382  | NS      |
| PC(16:0p/22:6) | r-GT        | -0.5732 | 0.0162*  | 0.0031  | NS | 0.0714  | NS      | 0.0476  | NS      |
| PC(16:0p/22:6) | PT          | 0.5550  | 0.0208*  | 0.0498  | NS | 0.3202  | NS      | 0.1407  | NS      |
| PC(16:0p/22:6) | INR         | 0.5550  | 0.0208*  | 0.0498  | NS | 0.3202  | NS      | 0.1407  | NS      |
| PC(18:0e/16:0) | ALT         | -0.6687 | 0.0033** | 0.0517  | NS | -0.0784 | NS      | -0.0167 | NS      |
| PC(18:0e/16:0) | AST         | -0.6080 | 0.0096** | -0.1337 | NS | -0.2957 | NS      | -0.0310 | NS      |
| PC(18:0e/16:0) | DBIL        | -0.5914 | 0.0124*  | -0.2872 | NS | -0.3169 | NS      | -0.0070 | NS      |
| PC(18:0e/16:0) | r-GT        | -0.5141 | 0.0347*  | -0.0103 | NS | 0.0526  | NS      | -0.1404 | NS      |
| PC(18:0e/16:0) | TBIL        | -0.5098 | 0.0366*  | -0.4294 | NS | -0.1952 | NS      | -0.1066 | NS      |
| PC(18:0e/16:0) | PT          | 0.6059  | 0.0099** | -0.1267 | NS | 0.2442  | NS      | 0.1959  | NS      |
| PC(18:0e/16:0) | INR         | 0.6059  | 0.0099** | -0.1267 | NS | 0.2442  | NS      | 0.1959  | NS      |
| PC(18:0e/18:0) | ALT         | -0.5546 | 0.0209*  | 0.2273  | NS | 0.0825  | NS      | 0.4383  | 0.0107* |
| PC(18:0e/18:0) | RBC         | -0.4856 | 0.0482*  | 0.1538  | NS | 0.2264  | NS      | -0.2396 | NS      |
| PC(18:0p/16:0) | Eosinophils | -0.6568 | 0.0042** | -0.1523 | NS | 0.3292  | NS      | -0.1282 | NS      |
| PC(18:0p/16:0) | ALT         | -0.5914 | 0.0124*  | 0.2293  | NS | -0.1221 | NS      | 0.2231  | NS      |
| PC(18:0p/18:0) | TBIL        | -0.4902 | 0.0458*  | -0.0217 | NS | -0.4407 | 0.0116* | -0.0234 | NS      |
| PC(18:0p/18:0) | IBIL        | -0.4853 | 0.0483*  | -0.0877 | NS | -0.3933 | 0.0260* | -0.0510 | NS      |
| PC(18:0p/18:1) | ALT         | -0.7106 | 0.0014** | -0.0769 | NS | -0.2217 | NS      | -0.0768 | NS      |
| PC(18:0p/18:1) | AST         | -0.6144 | 0.0087** | -0.0401 | NS | -0.3119 | NS      | -0.1059 | NS      |
| PC(18:0p/18:1) | LDH         | -0.5435 | 0.0241*  | -0.0885 | NS | -0.2511 | NS      | -0.2448 | NS      |
| PC(18:0p/18:1) | Eosinophils | -0.5022 | 0.0399*  | 0.0432  | NS | 0.1836  | NS      | -0.1028 | NS      |

|                |                |         |           |         |          |         |         |         |    |
|----------------|----------------|---------|-----------|---------|----------|---------|---------|---------|----|
| PC(18:1e/16:0) | Eosinophils    | -0.5120 | 0.0356*   | -0.0880 | NS       | 0.3022  | NS      | -0.1628 | NS |
| PC(18:1e/18:1) | LDH            | -0.4847 | 0.0486*   | -0.0129 | NS       | 0.0765  | NS      | -0.2620 | NS |
| PC(18:1e/18:1) | globulin       | 0.5237  | 0.0310*   | -0.1116 | NS       | -0.0620 | NS      | 0.1190  | NS |
| PC(18:2/20:3)  | $\alpha$ -HBDH | -0.5071 | 0.0378*   | -0.1937 | NS       | -0.1467 | NS      | 0.0293  | NS |
| PC(18:2/20:3)  | CK-MB          | 0.4853  | 0.0483*   | 0.1723  | NS       | 0.0006  | NS      | -0.3034 | NS |
| PC(18:2/20:3)  | ALT            | 0.5117  | 0.0358*   | -0.4793 | 0.0441*  | 0.1763  | NS      | -0.1689 | NS |
| PC(18:2/20:3)  | Creatinine     | 0.5368  | 0.0263*   | 0.1063  | NS       | -0.3765 | 0.0337* | -0.2856 | NS |
| PC(18:2e/12:0) | HCT            | -0.6278 | 0.0070**  | -0.2405 | NS       | -0.1005 | NS      | 0.1464  | NS |
| PC(18:2e/12:0) | HGB            | -0.6094 | 0.0094**  | -0.2398 | NS       | -0.3816 | 0.0311* | 0.0373  | NS |
| PC(18:2e/12:0) | RBC            | -0.6082 | 0.0096**  | 0.0464  | NS       | -0.2814 | NS      | -0.0217 | NS |
| PC(18:2e/12:0) | Eosinophils    | -0.4997 | 0.0411*   | -0.5945 | 0.0093** | -0.0035 | NS      | -0.2919 | NS |
| PC(18:2e/12:0) | TT             | 0.4889  | 0.0464*   | 0.0021  | NS       | 0.0777  | NS      | -0.2274 | NS |
| PC(18:2e/12:0) | Ca             | 0.6061  | 0.0099**  | 0.1457  | NS       | 0.0850  | NS      | -0.3110 | NS |
| PC(18:2e/16:0) | Lymphocytes    | -0.6291 | 0.0068**  | 0.0052  | NS       | -0.1615 | NS      | -0.0064 | NS |
| PC(18:2e/16:0) | Mg             | -0.6047 | 0.0101*   | 0.1281  | NS       | -0.1702 | NS      | 0.0453  | NS |
| PC(18:2e/16:0) | WBC            | -0.5735 | 0.0161*   | -0.0464 | NS       | -0.0623 | NS      | 0.3212  | NS |
| PC(18:2e/16:0) | FIB            | -0.4902 | 0.0458*   | -0.3237 | NS       | 0.0750  | NS      | -0.1175 | NS |
| PC(18:2p/20:4) | DBIL           | -0.7350 | 0.0008*** | 0.0568  | NS       | -0.1198 | NS      | -0.0418 | NS |
| PC(18:2p/20:4) | TBIL           | -0.7132 | 0.0013**  | -0.0445 | NS       | -0.1652 | NS      | -0.2052 | NS |
| PC(18:2p/20:4) | ALT            | -0.7092 | 0.0014**  | 0.0733  | NS       | -0.0957 | NS      | 0.1171  | NS |
| PC(18:2p/20:4) | IBIL           | -0.6765 | 0.0029**  | -0.0279 | NS       | -0.1667 | NS      | -0.2925 | NS |
| PC(18:2p/20:4) | AST            | -0.6486 | 0.0049**  | -0.0218 | NS       | -0.2167 | NS      | 0.0263  | NS |
| PC(18:2p/20:4) | r-GT           | -0.5732 | 0.0162*   | 0.0155  | NS       | 0.0471  | NS      | 0.0627  | NS |
| PC(18:2p/20:4) | PT             | 0.5612  | 0.0191*   | 0.0426  | NS       | 0.3319  | NS      | 0.0962  | NS |
| PC(18:2p/20:4) | INR            | 0.5612  | 0.0191*   | 0.0426  | NS       | 0.3319  | NS      | 0.0962  | NS |
| PE(16:0/18:0)  | Mg             | 0.5283  | 0.0292*   | 0.2416  | NS       | -0.1347 | NS      | -0.1008 | NS |

|                |             |         |           |         |    |         |         |         |         |
|----------------|-------------|---------|-----------|---------|----|---------|---------|---------|---------|
| PE(16:0/22:4)  | CK-MB       | -0.7457 | 0.0006*** | -0.1998 | NS | -0.0440 | NS      | -0.1237 | NS      |
| PE(16:0/22:4)  | HGB         | -0.5351 | 0.0269*   | -0.3758 | NS | -0.1406 | NS      | -0.2025 | NS      |
| PE(16:0/22:4)  | HCT         | -0.5245 | 0.0307*   | -0.3434 | NS | 0.0486  | NS      | -0.0852 | NS      |
| PE(18:0/22:5)  | Eosinophils | -0.6683 | 0.0034**  | -0.0581 | NS | -0.0423 | NS      | -0.2225 | NS      |
| PE(18:0/22:5)  | LDH         | -0.5043 | 0.0390*   | -0.3207 | NS | -0.0241 | NS      | -0.0207 | NS      |
| PE(18:0/22:5)  | RDW         | 0.7678  | 0.0003*** | -0.0467 | NS | 0.0035  | NS      | 0.1010  | NS      |
| PI(16:0/20:3)  | RBC         | -0.5663 | 0.0178*   | 0.2745  | NS | 0.0579  | NS      | -0.2900 | NS      |
| PI(16:0/20:3)  | HCT         | -0.5491 | 0.0224*   | 0.0298  | NS | -0.0461 | NS      | -0.2261 | NS      |
| PI(18:0/20:3)  | LDH         | -0.5807 | 0.0145*   | 0.0073  | NS | -0.0389 | NS      | 0.2569  | NS      |
| PI(18:0/20:3)  | BUN         | -0.4929 | 0.0444*   | -0.1304 | NS | 0.2690  | NS      | 0.1530  | NS      |
| PI(18:0/20:3)  | PT          | 0.4965  | 0.0426*   | 0.1605  | NS | -0.2559 | NS      | -0.3229 | NS      |
| PI(18:0/20:3)  | INR         | 0.4965  | 0.0426*   | 0.1605  | NS | -0.2559 | NS      | -0.3229 | NS      |
| PI(18:0/20:3)  | ALP         | 0.4994  | 0.0412*   | -0.1878 | NS | 0.1169  | NS      | 0.0309  | NS      |
| PI(18:0/20:3)  | Mg          | 0.5112  | 0.0360*   | 0.1662  | NS | 0.1471  | NS      | 0.0486  | NS      |
| PI(18:0/20:3)  | RDW         | 0.5184  | 0.0330*   | -0.2929 | NS | -0.2970 | NS      | 0.1548  | NS      |
| SM(d18:1/16:0) | TBIL        | -0.5288 | 0.0291*   | -0.0494 | NS | -0.1840 | NS      | 0.0938  | NS      |
| SM(d18:1/16:0) | Glucose     | -0.5208 | 0.0321*   | -0.3225 | NS | 0.1476  | NS      | -0.1209 | NS      |
| SM(d18:1/16:0) | IBIL        | -0.4975 | 0.0422*   | -0.1477 | NS | -0.1986 | NS      | 0.0471  | NS      |
| SM(d18:1/16:0) | ALT         | -0.4953 | 0.0432*   | -0.0779 | NS | -0.1627 | NS      | 0.0576  | NS      |
| SM(d18:1/18:2) | AST         | 0.5143  | 0.0347*   | 0.0228  | NS | 0.0370  | NS      | -0.2300 | NS      |
| SM(d18:1/18:2) | Ca          | 0.5506  | 0.0220*   | -0.3532 | NS | -0.1678 | NS      | 0.3516  | 0.0448* |
| SM(d18:1/18:3) | Lymphocytes | -0.6387 | 0.0058**  | -0.1992 | NS | -0.0480 | NS      | -0.0316 | NS      |
| SM(d18:1/18:3) | HCT         | -0.6270 | 0.0071**  | 0.1269  | NS | -0.2071 | NS      | -0.2098 | NS      |
| SM(d18:1/18:3) | RBC         | -0.6196 | 0.0080**  | 0.1393  | NS | -0.4239 | 0.0156* | -0.0237 | NS      |
| SM(d18:1/18:3) | HGB         | -0.5632 | 0.0186*   | 0.1116  | NS | -0.4175 | 0.0174* | -0.0820 | NS      |
| SM(d18:1/18:3) | Monocytes   | -0.5283 | 0.0293*   | -0.0632 | NS | 0.2497  | NS      | -0.0274 | NS      |

|                |             |         |          |         |          |         |         |         |    |
|----------------|-------------|---------|----------|---------|----------|---------|---------|---------|----|
| SM(d18:1/18:3) | r-GT        | -0.5102 | 0.0364*  | 0.1643  | NS       | -0.3820 | 0.0310  | -0.0664 | NS |
| SM(d18:1/18:3) | WBC         | -0.4966 | 0.0426*  | -0.2487 | NS       | 0.0862  | NS      | -0.0943 | NS |
| SM(d18:1/18:3) | TT          | 0.5213  | 0.0319*  | 0.1302  | NS       | -0.1016 | NS      | 0.1609  | NS |
| SM(d18:1/18:3) | ALP         | 0.5519  | 0.0216*  | -0.0010 | NS       | -0.0029 | NS      | -0.0987 | NS |
| SM(d18:1/18:4) | DBIL        | -0.7097 | 0.0014** | -0.1957 | NS       | -0.2915 | NS      | 0.0631  | NS |
| SM(d18:1/18:4) | TBIL        | -0.6192 | 0.0080** | -0.3318 | NS       | -0.3213 | NS      | -0.1244 | NS |
| SM(d18:1/18:4) | r-GT        | -0.6079 | 0.0096** | 0.0435  | NS       | -0.3712 | 0.0365* | 0.1235  | NS |
| SM(d18:1/18:4) | IBIL        | -0.5602 | 0.0193*  | -0.3237 | NS       | -0.3313 | NS      | -0.2234 | NS |
| SM(d18:1/18:4) | Monocytes   | -0.5052 | 0.0386*  | -0.1247 | NS       | 0.0458  | NS      | 0.0067  | NS |
| SM(d18:1/18:4) | Neutrophils | -0.4991 | 0.0414*  | 0.1458  | NS       | -0.0372 | NS      | 0.0767  | NS |
| SM(d18:1/20:1) | Ca          | 0.5853  | 0.0136*  | 0.0341  | NS       | -0.0732 | NS      | -0.0694 | NS |
| SM(d18:1/20:2) | Ca          | 0.7153  | 0.0012** | 0.0124  | NS       | 0.0653  | NS      | -0.0085 | NS |
| SM(d18:1/20:4) | r-GT        | -0.5892 | 0.0128*  | -0.1756 | NS       | -0.0337 | NS      | -0.1123 | NS |
| SM(d18:1/20:4) | ALT         | -0.5215 | 0.0318*  | -0.2231 | NS       | -0.1398 | NS      | -0.1056 | NS |
| SM(d18:1/20:4) | Mg          | 0.5185  | 0.0330*  | 0.2967  | NS       | 0.0745  | NS      | 0.0849  | NS |
| SM(d18:1/20:5) | CRP         | -0.6094 | 0.0094** | 0.4689  | 0.0496*  | -0.2619 | NS      | 0.0931  | NS |
| SM(d18:1/22:0) | Monocytes   | -0.6921 | 0.0021** | 0.6159  | 0.0065** | 0.0753  | NS      | -0.2187 | NS |
| SM(d18:1/22:0) | Albumin     | -0.6193 | 0.0080** | -0.3098 | NS       | -0.2211 | NS      | 0.1057  | NS |
| SM(d18:1/22:0) | HGB         | -0.6143 | 0.0087** | 0.3008  | NS       | -0.2077 | NS      | -0.2340 | NS |
| SM(d18:1/22:0) | Eosinophils | -0.5795 | 0.0148*  | 0.5251  | 0.0252*  | 0.4042  | 0.0218* | -0.1518 | NS |
| SM(d18:1/22:0) | HCT         | -0.5653 | 0.0180*  | 0.3292  | NS       | -0.0374 | NS      | -0.2075 | NS |
| SM(d18:1/22:0) | RDW         | 0.5170  | 0.0336*  | -0.1574 | NS       | 0.0820  | NS      | -0.0971 | NS |
| SM(d18:1/22:3) | Monocytes   | -0.6564 | 0.0042** | 0.3339  | NS       | 0.0360  | NS      | -0.1633 | NS |
| SM(d18:1/22:3) | Eosinophils | -0.6126 | 0.0089** | 0.4516  | NS       | 0.3101  | NS      | -0.1883 | NS |
| SM(d18:1/22:3) | HGB         | -0.5690 | 0.0171*  | 0.2036  | NS       | -0.1079 | NS      | -0.2027 | NS |
| SM(d18:1/22:3) | ALT         | -0.5485 | 0.0226*  | 0.5207  | 0.0267*  | -0.0516 | NS      | 0.1948  | NS |

|                |           |         |          |         |           |         |    |         |         |
|----------------|-----------|---------|----------|---------|-----------|---------|----|---------|---------|
| SM(d18:1/22:3) | HCT       | -0.5322 | 0.0279*  | 0.1909  | NS        | 0.0519  | NS | -0.1635 | NS      |
| SM(d18:1/22:3) | Albumin   | -0.5003 | 0.0408*  | -0.3882 | NS        | -0.1581 | NS | -0.0345 | NS      |
| SM(d18:1/22:3) | RBC       | -0.4844 | 0.0488*  | 0.2116  | NS        | -0.0174 | NS | -0.1444 | NS      |
| SM(d18:1/22:3) | ALP       | 0.4920  | 0.0448*  | 0.2602  | NS        | 0.2857  | NS | -0.0460 | NS      |
| SM(d18:1/22:3) | RDW       | 0.6219  | 0.0077** | -0.2754 | NS        | 0.0820  | NS | -0.0895 | NS      |
| SM(d18:1/22:4) | Mg        | 0.5495  | 0.0223*  | 0.3203  | NS        | 0.1032  | NS | 0.0995  | NS      |
| TAG(50:0)      | APTT      | -0.5289 | 0.0290*  | -0.2235 | NS        | 0.2111  | NS | 0.1576  | NS      |
| TAG(50:0)      | r-GT      | 0.5019  | 0.0401*  | -0.3230 | NS        | 0.3059  | NS | -0.1860 | NS      |
| TAG(50:0)      | UA        | 0.5376  | 0.0260*  | -0.2092 | NS        | -0.0477 | NS | -0.2390 | NS      |
| TAG(50:0)      | ALT       | 0.5702  | 0.0168*  | -0.0552 | NS        | 0.0262  | NS | -0.2210 | NS      |
| TAG(50:2)      | CK-MB     | -0.5150 | 0.0344*  | -0.2701 | NS        | -0.0999 | NS | -0.0074 | NS      |
| TAG(52:5)      | LDH       | -0.4876 | 0.0471*  | -0.1644 | NS        | 0.0950  | NS | -0.0861 | NS      |
| DAG(14:0/16:0) | Mg        | -0.1810 | NS       | 0.6008  | 0.0084**  | -0.1116 | NS | 0.4230  | 0.0142* |
| DAG(14:0/16:0) | Glucose   | -0.1545 | NS       | 0.4923  | 0.0380*   | -0.1796 | NS | -0.0364 | NS      |
| DAG(14:0/18:0) | Glucose   | -0.1803 | NS       | 0.6574  | 0.0030**  | -0.0923 | NS | -0.0219 | NS      |
| DAG(14:0/18:0) | RDW       | 0.0333  | NS       | 0.4886  | 0.0396*   | -0.0555 | NS | 0.3081  | NS      |
| DAG(14:0/18:0) | CK-MB     | 0.2745  | NS       | -0.6326 | 0.0048**  | 0.0180  | NS | -0.0739 | NS      |
| DAG(14:0/18:2) | Basophils | -0.2983 | NS       | 0.4783  | 0.0447*   | 0.1510  | NS | 0.1483  | NS      |
| DAG(14:0/18:2) | ALT       | -0.0974 | NS       | 0.7423  | 0.0004*** | -0.0838 | NS | 0.0418  | NS      |
| DAG(14:0/18:2) | AST       | -0.0275 | NS       | 0.6769  | 0.0020**  | -0.1884 | NS | 0.0729  | NS      |
| DAG(14:0/18:2) | RBC       | 0.2259  | NS       | 0.5200  | 0.0270*   | -0.0149 | NS | -0.3379 | NS      |
| DAG(16:0/16:0) | ALT       | 0.1926  | NS       | -0.5083 | 0.0313*   | 0.0108  | NS | -0.2227 | NS      |
| DAG(16:0/16:0) | PT        | 0.3389  | NS       | -0.4704 | 0.0488*   | 0.1029  | NS | -0.1399 | NS      |
| DAG(16:0/16:0) | INR       | 0.3389  | NS       | -0.4704 | 0.0488*   | 0.1029  | NS | -0.1399 | NS      |
| DAG(16:0/16:1) | Mg        | -0.2993 | NS       | 0.5018  | 0.0338*   | -0.1463 | NS | 0.2396  | NS      |
| DAG(16:0/16:1) | Glucose   | -0.2109 | NS       | 0.6305  | 0.0050**  | -0.0008 | NS | -0.0162 | NS      |

|                |         |         |    |         |          |         |          |         |         |
|----------------|---------|---------|----|---------|----------|---------|----------|---------|---------|
| DAG(16:0/16:1) | RDW     | 0.1024  | NS | 0.6035  | 0.0080** | -0.0587 | NS       | 0.2718  | NS      |
| DAG(16:0/16:1) | CK-MB   | 0.1838  | NS | -0.5893 | 0.0101*  | 0.0056  | NS       | 0.0192  | NS      |
| DAG(16:1/16:1) | Glucose | -0.1496 | NS | 0.5934  | 0.0094** | 0.1366  | NS       | -0.1270 | NS      |
| DAG(16:1/16:1) | PT      | 0.1316  | NS | -0.5016 | 0.0339*  | 0.3994  | 0.0235*  | 0.1584  | NS      |
| DAG(16:1/16:1) | INR     | 0.1316  | NS | -0.5016 | 0.0339*  | 0.3994  | 0.0235*  | 0.1584  | NS      |
| DAG(16:1/16:1) | CK-MB   | 0.1642  | NS | -0.5831 | 0.0111*  | -0.1499 | NS       | -0.2262 | NS      |
| DAG(16:1/18:0) | UA      | 0.2211  | NS | -0.5676 | 0.0140*  | 0.1733  | NS       | -0.1175 | NS      |
| DAG(18:1/20:0) | Glucose | -0.0527 | NS | 0.5893  | 0.0101*  | -0.1222 | NS       | 0.0433  | NS      |
| DAG(18:1/20:0) | CK-MB   | 0.2647  | NS | -0.5562 | 0.0165*  | 0.2449  | NS       | 0.1551  | NS      |
| FFA(14:0)      | ALP     | -0.3350 | NS | 0.4863  | 0.0407*  | -0.1511 | NS       | -0.2216 | NS      |
| FFA(20:3)      | CK-MB   | -0.2868 | NS | 0.5480  | 0.0186*  | -0.2045 | NS       | 0.1555  | NS      |
| FFA(20:4)      | RDW     | -0.0802 | NS | 0.4979  | 0.0355*  | 0.1043  | NS       | 0.2307  | NS      |
| FFA(20:4)      | Glucose | -0.0723 | NS | 0.4819  | 0.0428*  | 0.0148  | NS       | -0.2937 | NS      |
| FFA(20:5)      | RDW     | -0.0728 | NS | 0.4803  | 0.0436*  | 0.0861  | NS       | 0.2444  | NS      |
| FFA(20:5)      | Glucose | -0.0503 | NS | 0.4861  | 0.0408*  | -0.0244 | NS       | -0.3176 | NS      |
| FFA(22:5)      | CO2     | 0.1340  | NS | 0.6136  | 0.0068** | 0.0403  | NS       | -0.0883 | NS      |
| LPC(15:0)      | LDH     | -0.3456 | NS | -0.6815 | 0.0018** | -0.3572 | NS       | -0.1789 | NS      |
| LPC(18:0)      | LDH     | -0.3873 | NS | -0.5142 | 0.0290*  | -0.3258 | NS       | 0.0064  | NS      |
| LPC(18:1)      | LDH     | -0.0178 | NS | -0.5368 | 0.0216*  | -0.4149 | 0.0281*  | 0.0158  | NS      |
| LPC(20:0)      | P       | 0.2880  | NS | -0.5372 | 0.0215*  | 0.2454  | NS       | -0.1109 | NS      |
| LPC(O/16:0)    | LDH     | -0.3725 | NS | -0.6071 | 0.0075** | -0.3534 | NS       | -0.2522 | NS      |
| LPE(14:0)      | WBC     | -0.3235 | NS | 0.4985  | 0.0353*  | 0.2980  | NS       | 0.0023  | NS      |
| LPE(14:0)      | CRP     | -0.2759 | NS | 0.5370  | 0.0216*  | 0.4826  | 0.0051** | 0.3723  | 0.0329* |
| LPE(14:0)      | r-GT    | -0.2239 | NS | 0.4773  | 0.0452*  | -0.0298 | NS       | 0.0620  | NS      |
| LPE(14:0)      | TT      | 0.1441  | NS | 0.5189  | 0.0274*  | 0.2815  | NS       | -0.2808 | NS      |
| MAG(22:5)      | Glucose | -0.3102 | NS | 0.6471  | 0.0037** | -0.4065 | 0.0318*  | 0.1931  | NS      |



|                |             |         |    |         |           |         |         |         |         |
|----------------|-------------|---------|----|---------|-----------|---------|---------|---------|---------|
| PA(16:0/18:0)  | globulin    | -0.0221 | NS | 0.5085  | 0.0312*   | -0.0518 | NS      | -0.0570 | NS      |
| PA(16:0/18:0)  | PT          | 0.3926  | NS | -0.5465 | 0.0189*   | 0.2344  | NS      | -0.1777 | NS      |
| PA(16:0/18:0)  | INR         | 0.3926  | NS | -0.5465 | 0.0189*   | 0.2344  | NS      | -0.1777 | NS      |
| PC(14:0/16:0)  | Neutrophils | -0.1741 | NS | 0.6326  | 0.0048**  | 0.2143  | NS      | -0.0659 | NS      |
| PC(16:0/18:0)  | Creatinine  | -0.4363 | NS | -0.4943 | 0.0370*   | 0.2055  | NS      | -0.2860 | NS      |
| PC(16:0/18:0)  | CK-MB       | -0.1471 | NS | -0.4902 | 0.0389*   | 0.3344  | NS      | -0.1590 | NS      |
| PC(16:0/18:0)  | UA          | -0.1447 | NS | -0.4923 | 0.0380*   | 0.1763  | NS      | -0.4398 | 0.0104* |
| PC(16:0/18:0)  | Basophils   | -0.1129 | NS | -0.7508 | 0.0003*** | 0.2315  | NS      | -0.0108 | NS      |
| PC(16:0/20:3)  | Mg          | -0.0998 | NS | 0.5581  | 0.0161*   | -0.0390 | NS      | -0.1119 | NS      |
| PC(16:0/20:3)  | TP          | 0.1815  | NS | 0.4744  | 0.0467*   | -0.0900 | NS      | -0.1017 | NS      |
| PC(16:0/22:3)  | AST         | -0.1932 | NS | -0.4746 | 0.0466*   | 0.0978  | NS      | 0.0685  | NS      |
| PC(16:0/22:3)  | Ca          | 0.3816  | NS | 0.5186  | 0.0275*   | -0.1810 | NS      | -0.1782 | NS      |
| PC(16:0e/16:0) | TBIL        | -0.4167 | NS | -0.5049 | 0.0326*   | -0.2042 | NS      | 0.1574  | NS      |
| PC(16:0e/16:0) | IBIL        | -0.3873 | NS | -0.5129 | 0.0295*   | -0.1586 | NS      | 0.0702  | NS      |
| PC(16:0e/16:0) | LDH         | 0.0025  | NS | -0.6773 | 0.0020**  | -0.0208 | NS      | 0.1664  | NS      |
| PC(16:0e/16:1) | Neutrophils | -0.0196 | NS | 0.5562  | 0.0165*   | -0.3710 | 0.0366* | -0.1008 | NS      |
| PC(16:0e/16:1) | CRP         | 0.0135  | NS | 0.5256  | 0.0251*   | -0.3385 | NS      | 0.0923  | NS      |
| PC(16:0e/16:1) | WBC         | 0.1422  | NS | 0.6264  | 0.0054**  | -0.3448 | NS      | -0.0993 | NS      |
| PC(16:0e/18:0) | LDH         | -0.2157 | NS | -0.6608 | 0.0028**  | -0.2956 | NS      | 0.0416  | NS      |
| PC(16:0e/18:0) | PLT         | 0.0907  | NS | 0.5803  | 0.0116*   | 0.2992  | NS      | -0.0939 | NS      |
| PC(16:0e/18:1) | LDH         | 0.0588  | NS | -0.5421 | 0.0201*   | -0.2039 | NS      | 0.0050  | NS      |
| PC(16:0e/18:1) | APTT        | 0.2269  | NS | -0.4760 | 0.0459*   | 0.0066  | NS      | -0.2232 | NS      |
| PC(16:0e/20:2) | globulin    | -0.1496 | NS | 0.6839  | 0.0017**  | -0.0492 | NS      | 0.1543  | NS      |
| PC(16:0p/16:0) | AST         | -0.0529 | NS | 0.4777  | 0.0450*   | -0.2834 | NS      | 0.1139  | NS      |
| PC(16:0p/16:0) | Eosinophils | 0.1866  | NS | 0.5479  | 0.0186*   | -0.1035 | NS      | -0.0321 | NS      |
| PC(16:0p/16:0) | r-GT        | 0.1980  | NS | 0.6012  | 0.0083**  | -0.2361 | NS      | 0.1270  | NS      |

|                |             |         |    |         |          |         |         |         |           |
|----------------|-------------|---------|----|---------|----------|---------|---------|---------|-----------|
| PC(16:0p/16:0) | CRP         | 0.2219  | NS | 0.4853  | 0.0412*  | -0.4304 | 0.0139* | 0.2930  | NS        |
| PC(16:0p/16:0) | ALT         | 0.3411  | NS | 0.4804  | 0.0436*  | -0.1447 | NS      | 0.0601  | NS        |
| PC(16:0p/18:1) | r-GT        | -0.3456 | NS | 0.4845  | 0.0416*  | -0.2996 | NS      | -0.0548 | NS        |
| PC(16:0p/18:1) | ALT         | -0.2834 | NS | 0.5981  | 0.0087** | -0.1144 | NS      | 0.0949  | NS        |
| PC(16:0p/18:1) | AST         | -0.0443 | NS | 0.5554  | 0.0167*  | -0.3022 | NS      | 0.0561  | NS        |
| PC(16:0p/18:3) | Ca          | 0.1411  | NS | 0.5010  | 0.0342*  | 0.1223  | NS      | 0.0037  | NS        |
| PC(16:0p/20:0) | TT          | 0.2291  | NS | -0.4920 | 0.0381*  | 0.0579  | NS      | -0.0456 | NS        |
| PC(16:0p/20:1) | globulin    | -0.2502 | NS | 0.5031  | 0.0333*  | 0.1840  | NS      | -0.0043 | NS        |
| PC(16:0p/20:1) | r-GT        | -0.0775 | NS | -0.5640 | 0.0148*  | -0.1777 | NS      | -0.1238 | NS        |
| PC(16:0p/20:1) | ALT         | 0.3166  | NS | -0.5083 | 0.0313*  | -0.1051 | NS      | -0.0115 | NS        |
| PC(18:0e/16:0) | LDH         | -0.3186 | NS | -0.6959 | 0.0013** | -0.2453 | NS      | 0.0311  | NS        |
| PC(18:0e/18:0) | Neutrophils | -0.2428 | NS | 0.4902  | 0.0389*  | 0.0511  | NS      | -0.1566 | NS        |
| PC(18:0e/18:0) | TP          | -0.2354 | NS | -0.4837 | 0.0420*  | 0.0513  | NS      | 0.1604  | NS        |
| PC(18:0e/18:0) | WBC         | -0.2157 | NS | 0.6326  | 0.0048** | 0.1102  | NS      | -0.0488 | NS        |
| PC(18:0p/14:0) | RDW         | -0.2061 | NS | -0.4689 | 0.0496*  | 0.0785  | NS      | -0.2460 | NS        |
| PC(18:0p/16:0) | LDH         | -0.1961 | NS | -0.5245 | 0.0254*  | -0.2915 | NS      | -0.0040 | NS        |
| PC(18:0p/18:0) | TP          | 0.2624  | NS | 0.4910  | 0.0386*  | -0.1604 | NS      | 0.0062  | NS        |
| PC(18:0p/18:1) | Creatinine  | -0.1687 | NS | -0.4929 | 0.0377*  | 0.0545  | NS      | -0.5814 | 0.0004*** |
| PC(18:0p/18:1) | RDW         | 0.4272  | NS | -0.4803 | 0.0437*  | 0.0676  | NS      | -0.0433 | NS        |
| PC(18:1e/16:0) | LDH         | 0.0294  | NS | -0.4739 | 0.0469*  | -0.2138 | NS      | -0.0403 | NS        |
| PC(18:1e/16:0) | APTT        | 0.1974  | NS | -0.4770 | 0.0453*  | 0.0216  | NS      | -0.2047 | NS        |
| PC(18:1e/18:1) | RBC         | -0.0703 | NS | -0.5552 | 0.0168*  | -0.0289 | NS      | -0.5429 | 0.0011**  |
| PC(18:1e/18:1) | Neutrophils | 0.1951  | NS | -0.5388 | 0.0211*  | 0.0101  | NS      | -0.4044 | 0.0196*   |
| PC(18:1e/18:1) | Creatinine  | 0.2151  | NS | -0.4801 | 0.0438*  | -0.1423 | NS      | -0.5159 | 0.0021**  |
| PC(18:2/20:3)  | FIB         | 0.1127  | NS | 0.5926  | 0.0096** | -0.0927 | NS      | 0.2424  | NS        |
| PC(18:2/20:3)  | AST         | 0.2375  | NS | -0.5161 | 0.0284*  | 0.1219  | NS      | -0.2974 | NS        |

|                |             |         |    |         |           |         |    |         |         |
|----------------|-------------|---------|----|---------|-----------|---------|----|---------|---------|
| PC(18:2e/12:0) | Monocytes   | -0.0824 | NS | -0.6107 | 0.0071**  | 0.0913  | NS | 0.0714  | NS      |
| PC(18:2e/12:0) | TP          | 0.1619  | NS | 0.5003  | 0.0345*   | -0.2279 | NS | -0.0189 | NS      |
| PC(18:2e/16:0) | ALT         | -0.1301 | NS | 0.5682  | 0.0139*   | -0.0957 | NS | 0.2077  | NS      |
| PC(18:2e/16:0) | AST         | -0.0185 | NS | 0.5254  | 0.0251*   | -0.1771 | NS | 0.0916  | NS      |
| PC(18:2e/18:0) | globulin    | -0.4194 | NS | 0.5661  | 0.0143*   | -0.0541 | NS | 0.2113  | NS      |
| PE(16:0/18:0)  | UA          | -0.1815 | NS | -0.5315 | 0.0232*   | 0.1224  | NS | -0.2263 | NS      |
| PE(16:0/18:0)  | Neutrophils | -0.1619 | NS | -0.5666 | 0.0142*   | -0.3217 | NS | -0.3555 | 0.0423* |
| PE(16:0/18:0)  | CRP         | -0.1177 | NS | -0.6001 | 0.0085**  | 0.1454  | NS | -0.2606 | NS      |
| PE(16:0/18:0)  | Monocytes   | -0.0381 | NS | -0.6957 | 0.0013**  | -0.1074 | NS | -0.4387 | 0.0107* |
| PE(16:0/18:0)  | ALT         | 0.0626  | NS | -0.6343 | 0.0047**  | 0.0731  | NS | -0.1262 | NS      |
| PE(16:0/18:0)  | CK-MB       | 0.0711  | NS | -0.5583 | 0.0160*   | 0.0827  | NS | 0.0104  | NS      |
| PE(16:0/18:0)  | WBC         | 0.1275  | NS | -0.7379 | 0.0005*** | -0.2982 | NS | -0.4164 | 0.0159* |
| PE(16:0/18:0)  | Creatinine  | 0.2990  | NS | -0.5088 | 0.0311*   | 0.0548  | NS | -0.2216 | NS      |
| PE(16:0/22:4)  | APTT        | 0.0797  | NS | 0.4981  | 0.0354*   | 0.2494  | NS | -0.1156 | NS      |
| PE(18:0/22:5)  | PT          | 0.2748  | NS | -0.5109 | 0.0302*   | -0.2331 | NS | -0.1365 | NS      |
| PE(18:0/22:5)  | INR         | 0.2748  | NS | -0.5109 | 0.0302*   | -0.2331 | NS | -0.1365 | NS      |
| PI(16:0/20:3)  | WBC         | -0.0110 | NS | 0.5457  | 0.0191*   | 0.0997  | NS | 0.0644  | NS      |
| PI(16:0/20:3)  | Neutrophils | 0.2636  | NS | 0.4950  | 0.0367*   | 0.1539  | NS | 0.0264  | NS      |
| SM(d18:1/18:4) | LDH         | -0.2236 | NS | -0.5484 | 0.0185*   | -0.0476 | NS | 0.1226  | NS      |
| SM(d18:1/20:1) | globulin    | -0.1189 | NS | 0.7231  | 0.0007*** | 0.1192  | NS | -0.0358 | NS      |
| SM(d18:1/20:1) | PLT         | 0.0294  | NS | 0.5183  | 0.0275*   | 0.1832  | NS | -0.2094 | NS      |
| SM(d18:1/20:2) | r-GT        | -0.4219 | NS | -0.6064 | 0.0076**  | -0.0723 | NS | -0.2346 | NS      |
| SM(d18:1/20:2) | ALT         | -0.0589 | NS | -0.6271 | 0.0053**  | -0.0718 | NS | -0.1041 | NS      |
| SM(d18:1/20:2) | globulin    | -0.0221 | NS | 0.6033  | 0.0080**  | 0.1203  | NS | -0.0269 | NS      |
| SM(d18:1/20:2) | UA          | 0.0037  | NS | -0.4696 | 0.0493*   | -0.1891 | NS | -0.0204 | NS      |
| SM(d18:1/20:2) | AST         | 0.2831  | NS | -0.5679 | 0.0140*   | -0.3116 | NS | -0.0613 | NS      |

|                |             |         |    |         |           |         |         |         |         |
|----------------|-------------|---------|----|---------|-----------|---------|---------|---------|---------|
| SM(d18:1/20:4) | Monocytes   | -0.3085 | NS | -0.4759 | 0.0459*   | 0.0004  | NS      | -0.1886 | NS      |
| SM(d18:1/20:4) | Ca          | 0.3988  | NS | 0.5795  | 0.0117*   | 0.0762  | NS      | 0.1690  | NS      |
| SM(d18:1/20:5) | r-GT        | -0.2706 | NS | 0.4873  | 0.0402*   | -0.2856 | NS      | -0.0325 | NS      |
| SM(d18:1/20:5) | WBC         | -0.0931 | NS | 0.4987  | 0.0351*   | -0.1976 | NS      | -0.2731 | NS      |
| SM(d18:1/22:0) | ALT         | -0.4209 | NS | 0.7283  | 0.0006*** | 0.0931  | NS      | 0.1986  | NS      |
| SM(d18:1/22:0) | WBC         | -0.4167 | NS | 0.4861  | 0.0408*   | 0.3248  | NS      | -0.0702 | NS      |
| SM(d18:1/22:0) | CRP         | -0.3948 | NS | 0.5949  | 0.0092**  | 0.3048  | NS      | 0.2893  | NS      |
| SM(d18:1/22:0) | TP          | -0.3679 | NS | -0.6543 | 0.0032**  | -0.0847 | NS      | 0.0487  | NS      |
| SM(d18:1/22:0) | r-GT        | -0.2804 | NS | 0.6023  | 0.0082**  | -0.0520 | NS      | 0.1178  | NS      |
| SM(d18:1/22:0) | Neutrophils | -0.2685 | NS | 0.4737  | 0.0471*   | 0.3115  | NS      | -0.0657 | NS      |
| SM(d18:1/22:0) | globulin    | -0.2146 | NS | -0.5806 | 0.0115*   | 0.1506  | NS      | -0.0582 | NS      |
| SM(d18:1/22:0) | AST         | -0.1575 | NS | 0.5969  | 0.0089**  | 0.1440  | NS      | 0.2265  | NS      |
| SM(d18:1/22:3) | WBC         | -0.4681 | NS | 0.5872  | 0.0104*   | 0.2772  | NS      | -0.0438 | NS      |
| SM(d18:1/22:3) | r-GT        | -0.4539 | NS | 0.4959  | 0.0364*   | -0.0053 | NS      | 0.1342  | NS      |
| SM(d18:1/22:3) | CRP         | -0.3127 | NS | 0.5670  | 0.0141*   | 0.2364  | NS      | 0.3000  | NS      |
| SM(d18:1/22:3) | TP          | -0.2403 | NS | -0.6222 | 0.0058**  | -0.0987 | NS      | -0.0283 | NS      |
| SM(d18:1/22:3) | globulin    | -0.1202 | NS | -0.5362 | 0.0218*   | 0.0327  | NS      | -0.0513 | NS      |
| SM(d18:1/22:4) | LDH         | -0.0933 | NS | -0.4765 | 0.0456*   | 0.1985  | NS      | 0.0197  | NS      |
| SM(d18:1/22:4) | Ca          | 0.4815  | NS | 0.4746  | 0.0466*   | 0.0374  | NS      | 0.1392  | NS      |
| TAG(48:1)      | IBIL        | -0.0567 | NS | 0.5016  | 0.0339*   | -0.1747 | NS      | 0.0483  | NS      |
| TAG(50:2)      | P           | -0.1490 | NS | 0.5772  | 0.0121*   | -0.0993 | NS      | 0.1929  | NS      |
| TAG(50:2)      | Mg          | -0.1423 | NS | 0.5339  | 0.0225*   | 0.2113  | NS      | -0.1912 | NS      |
| TAG(50:2)      | Albumin     | 0.3509  | NS | 0.5758  | 0.0124*   | 0.2089  | NS      | 0.2015  | NS      |
| TAG(52:5)      | P           | -0.0548 | NS | -0.4899 | 0.0390*   | 0.1552  | NS      | -0.0659 | NS      |
| DAG(14:0/16:0) | AST         | 0.0406  | NS | -0.3316 | NS        | -0.3829 | 0.0305* | -0.1183 | NS      |
| DAG(14:0/16:0) | HCT         | 0.0576  | NS | 0.1125  | NS        | -0.3821 | 0.0309* | 0.4241  | 0.0139* |

|                |                |         |    |         |    |         |          |         |         |
|----------------|----------------|---------|----|---------|----|---------|----------|---------|---------|
| DAG(14:0/16:0) | UA             | 0.1140  | NS | -0.3622 | NS | -0.3683 | 0.0381*  | 0.1557  | NS      |
| DAG(14:0/16:0) | ALT            | 0.1521  | NS | -0.2448 | NS | -0.3857 | 0.0292*  | -0.0974 | NS      |
| DAG(14:0/18:0) | DBIL           | -0.2160 | NS | -0.2614 | NS | -0.3564 | 0.0453*  | 0.2061  | NS      |
| DAG(14:0/18:0) | HGB            | -0.0319 | NS | 0.1643  | NS | -0.4732 | 0.0062** | 0.2118  | NS      |
| DAG(14:0/18:0) | RBC            | -0.0098 | NS | 0.2260  | NS | -0.4783 | 0.0056** | 0.1400  | NS      |
| DAG(14:0/18:0) | HCT            | 0.0846  | NS | 0.1992  | NS | -0.4975 | 0.0038** | 0.1219  | NS      |
| DAG(14:0/18:0) | UA             | 0.1239  | NS | -0.0196 | NS | -0.3981 | 0.0240*  | 0.1414  | NS      |
| DAG(16:0/16:0) | BUN            | -0.1582 | NS | -0.0857 | NS | -0.4467 | 0.0104*  | 0.0012  | NS      |
| DAG(16:0/16:0) | HCT            | 0.0846  | NS | 0.0010  | NS | -0.3657 | 0.0395*  | -0.4173 | 0.0157* |
| DAG(16:0/16:1) | HGB            | -0.1263 | NS | 0.2718  | NS | -0.4535 | 0.0091** | 0.3769  | 0.0306* |
| DAG(16:0/16:1) | RBC            | -0.0061 | NS | 0.4056  | NS | -0.4541 | 0.0090** | 0.3242  | NS      |
| DAG(16:0/16:1) | HCT            | 0.0012  | NS | 0.3271  | NS | -0.4682 | 0.0069** | 0.3607  | 0.0392* |
| DAG(16:1/16:1) | Monocytes      | -0.2077 | NS | -0.3847 | NS | -0.3735 | 0.0352*  | -0.0914 | NS      |
| DAG(16:1/16:1) | DBIL           | -0.0687 | NS | -0.2913 | NS | -0.3933 | 0.0260*  | 0.3658  | 0.0363* |
| DAG(16:1/16:1) | HGB            | -0.0380 | NS | 0.2501  | NS | -0.4792 | 0.0055** | -0.0276 | NS      |
| DAG(16:1/16:1) | RBC            | -0.0270 | NS | 0.1889  | NS | -0.4087 | 0.0202*  | -0.0648 | NS      |
| DAG(16:1/16:1) | AST            | 0.0418  | NS | -0.1855 | NS | -0.4607 | 0.0080** | -0.1705 | NS      |
| DAG(16:1/16:1) | HCT            | 0.0650  | NS | 0.2508  | NS | -0.5204 | 0.0023** | -0.1737 | NS      |
| DAG(16:1/16:1) | UA             | 0.3225  | NS | -0.0052 | NS | -0.4073 | 0.0207*  | -0.1464 | NS      |
| DAG(16:1/16:1) | Creatinine     | 0.3897  | NS | 0.1476  | NS | -0.4841 | 0.0050** | -0.0184 | NS      |
| DAG(16:1/18:0) | FIB            | -0.1143 | NS | 0.2286  | NS | -0.3560 | 0.0455*  | 0.2860  | NS      |
| DAG(18:0/18:0) | PLT            | -0.2130 | NS | 0.0953  | NS | -0.3531 | 0.0474*  | -0.0944 | NS      |
| DAG(18:0/18:2) | BUN            | -0.3703 | NS | -0.3395 | NS | -0.3523 | 0.0480*  | -0.1907 | NS      |
| DAG(18:0/18:2) | HCT            | 0.1790  | NS | 0.1909  | NS | -0.3622 | 0.0416*  | -0.2882 | NS      |
| DAG(18:1/20:0) | PLT            | -0.1838 | NS | -0.0196 | NS | -0.4355 | 0.0127*  | 0.0358  | NS      |
| DAG(18:1/20:0) | $\alpha$ -HBDH | -0.0994 | NS | -0.2672 | NS | -0.3743 | 0.0348*  | 0.1976  | NS      |

|                |             |         |    |         |    |         |         |         |          |
|----------------|-------------|---------|----|---------|----|---------|---------|---------|----------|
| FFA(16:2)      | PT          | -0.1316 | NS | -0.4091 | NS | -0.3961 | 0.0248* | 0.1267  | NS       |
| FFA(16:2)      | INR         | -0.1316 | NS | -0.4091 | NS | -0.3961 | 0.0248* | 0.1267  | NS       |
| FFA(16:2)      | APTT        | 0.0736  | NS | -0.2282 | NS | -0.4137 | 0.0186* | -0.3710 | NS       |
| FFA(20:3)      | CO2         | -0.2471 | NS | 0.2562  | NS | -0.3745 | 0.0347* | -0.0174 | NS       |
| FFA(20:3)      | APTT        | 0.4329  | NS | -0.3397 | NS | -0.3634 | 0.0409* | -0.0639 | NS       |
| FFA(20:4)      | Mg          | 0.0468  | NS | 0.4508  | NS | -0.3905 | 0.0399* | 0.5426  | 0.0011** |
| FFA(20:4)      | HCT         | 0.1030  | NS | 0.1393  | NS | -0.4205 | 0.0165* | 0.3950  | 0.0229*  |
| FFA(20:4)      | UA          | 0.3765  | NS | -0.2301 | NS | -0.4036 | 0.0220* | 0.0622  | NS       |
| FFA(20:5)      | HCT         | 0.1018  | NS | 0.1414  | NS | -0.4297 | 0.0141* | 0.3367  | NS       |
| FFA(20:5)      | UA          | 0.3274  | NS | -0.1723 | NS | -0.4348 | 0.0129* | -0.0431 | NS       |
| FFA(22:3)      | Neutrophils | -0.2894 | NS | -0.2384 | NS | -0.3769 | 0.0335* | 0.4135  | 0.0168*  |
| LPC(15:0)      | AST         | -0.4394 | NS | -0.0187 | NS | -0.3788 | 0.0325* | -0.2389 | NS       |
| LPC(18:1)      | AST         | -0.4170 | NS | -0.0938 | NS | -0.3691 | 0.0376* | -0.1249 | NS       |
| LPC(18:1)      | HGB         | -0.2122 | NS | -0.4414 | NS | -0.3664 | 0.0392* | -0.0386 | NS       |
| LPC(O/16:0)    | AST         | -0.4529 | NS | 0.0062  | NS | -0.4055 | 0.0213* | -0.2732 | NS       |
| LPC(O/16:0)    | HGB         | -0.3752 | NS | -0.1251 | NS | -0.3528 | 0.0477* | -0.4541 | 0.0079** |
| LPE(14:0)      | DBIL        | -0.3816 | NS | -0.3812 | NS | -0.3700 | 0.0371* | -0.3534 | 0.0436*  |
| LPE(14:0)      | HGB         | -0.3335 | NS | 0.1561  | NS | -0.4250 | 0.0153* | -0.1577 | NS       |
| LPE(14:0)      | TBIL        | -0.2819 | NS | -0.3032 | NS | -0.3644 | 0.0403* | -0.5010 | 0.0030** |
| LPE(20:0)      | Monocytes   | 0.2139  | NS | -0.2976 | NS | -0.4440 | 0.0109* | 0.0632  | NS       |
| PC(14:0/16:0)  | LDH         | -0.3382 | NS | -0.0888 | NS | -0.4369 | 0.0201* | 0.0482  | NS       |
| PC(16:0/20:3)  | Creatinine  | -0.1789 | NS | 0.2054  | NS | -0.3771 | 0.0334* | 0.1202  | NS       |
| PC(16:0/20:3)  | AST         | -0.0480 | NS | -0.1658 | NS | -0.3841 | 0.0300* | -0.2369 | NS       |
| PC(16:0e/16:1) | BUN         | 0.1312  | NS | 0.0320  | NS | -0.4423 | 0.0113* | 0.3846  | 0.0271*  |
| PC(16:0e/18:1) | HGB         | -0.3188 | NS | -0.0868 | NS | -0.4206 | 0.0165* | -0.1937 | NS       |
| PC(16:0e/18:1) | DBIL        | -0.1939 | NS | -0.1157 | NS | -0.4030 | 0.0222* | -0.4250 | 0.0137*  |

|                |             |         |    |         |    |         |          |         |          |
|----------------|-------------|---------|----|---------|----|---------|----------|---------|----------|
| PC(16:0e/18:1) | TBIL        | -0.0760 | NS | -0.1304 | NS | -0.5516 | 0.0011** | -0.5431 | 0.0011** |
| PC(16:0e/18:1) | IBIL        | -0.0637 | NS | -0.1414 | NS | -0.5347 | 0.0016** | -0.5336 | 0.0014** |
| PC(16:0e/20:2) | r-GT        | -0.0627 | NS | -0.3048 | NS | -0.3928 | 0.0261*  | -0.2314 | NS       |
| PC(16:0p/16:0) | BUN         | -0.0147 | NS | 0.0526  | NS | -0.3939 | 0.0257*  | 0.2335  | NS       |
| PC(16:0p/16:0) | Neutrophils | 0.0723  | NS | 0.2900  | NS | -0.3679 | 0.0383*  | -0.0399 | NS       |
| PC(16:0p/16:0) | WBC         | 0.0882  | NS | 0.4035  | NS | -0.3721 | 0.0360*  | -0.0013 | NS       |
| PC(16:0p/16:0) | ALP         | 0.1104  | NS | 0.1910  | NS | -0.3521 | 0.0481*  | 0.3185  | NS       |
| PC(16:0p/16:0) | UA          | 0.3213  | NS | 0.0815  | NS | -0.3658 | 0.0395*  | 0.2824  | NS       |
| PC(16:0p/18:0) | HGB         | -0.3372 | NS | 0.0145  | NS | -0.4189 | 0.0170*  | -0.3815 | 0.0285*  |
| PC(16:0p/18:0) | DBIL        | -0.2479 | NS | -0.2810 | NS | -0.4241 | 0.0156*  | -0.4862 | 0.0041** |
| PC(16:0p/18:0) | IBIL        | -0.1642 | NS | -0.1785 | NS | -0.4708 | 0.0065** | -0.3937 | 0.0234*  |
| PC(16:0p/18:0) | TBIL        | -0.1593 | NS | -0.2225 | NS | -0.5052 | 0.0032** | -0.4729 | 0.0054** |
| PC(16:0p/18:1) | Creatinine  | -0.4191 | NS | 0.2487  | NS | -0.3608 | 0.0425*  | 0.1825  | NS       |
| PC(16:0p/18:1) | HGB         | -0.3384 | NS | 0.2605  | NS | -0.4371 | 0.0124*  | 0.1683  | NS       |
| PC(16:0p/18:1) | HCT         | -0.3274 | NS | 0.2652  | NS | -0.3611 | 0.0423*  | 0.1687  | NS       |
| PC(16:0p/18:1) | RBC         | -0.1962 | NS | 0.3209  | NS | -0.5038 | 0.0033** | 0.1878  | NS       |
| PC(16:0p/18:1) | UA          | -0.1447 | NS | 0.3168  | NS | -0.3985 | 0.0239*  | 0.1721  | NS       |
| PC(16:0p/18:3) | Creatinine  | 0.0392  | NS | -0.1042 | NS | -0.3830 | 0.0305*  | -0.0560 | NS       |
| PC(16:0p/20:0) | TBIL        | -0.4240 | NS | -0.0704 | NS | -0.4352 | 0.0128*  | -0.0201 | NS       |
| PC(16:0p/20:0) | IBIL        | -0.4167 | NS | -0.1723 | NS | -0.3808 | 0.0315*  | -0.0445 | NS       |
| PC(16:0p/20:0) | DBIL        | -0.3080 | NS | 0.1519  | NS | -0.4344 | 0.0130*  | 0.1152  | NS       |
| PC(16:0p/20:0) | Creatinine  | -0.2966 | NS | 0.1517  | NS | -0.3663 | 0.0392*  | 0.0961  | NS       |
| PC(18:0e/18:0) | LDH         | -0.2696 | NS | 0.1384  | NS | -0.4492 | 0.0165*  | -0.0206 | NS       |
| PC(18:0e/18:0) | FIB         | 0.1765  | NS | 0.1789  | NS | -0.5377 | 0.0015** | -0.0181 | NS       |
| PC(18:0p/14:0) | BUN         | -0.0417 | NS | -0.0072 | NS | -0.4740 | 0.0061** | 0.1200  | NS       |
| PC(18:0p/16:0) | HGB         | -0.4267 | NS | -0.0992 | NS | -0.4096 | 0.0199*  | -0.2049 | NS       |

|                |            |         |    |         |    |         |          |         |           |
|----------------|------------|---------|----|---------|----|---------|----------|---------|-----------|
| PC(18:0p/16:0) | DBIL       | -0.3055 | NS | -0.1002 | NS | -0.4254 | 0.0152*  | -0.4331 | 0.0118*   |
| PC(18:0p/16:0) | TBIL       | -0.1961 | NS | -0.1097 | NS | -0.5430 | 0.0013*  | -0.5284 | 0.0016**  |
| PC(18:0p/16:0) | IBIL       | -0.1716 | NS | -0.1249 | NS | -0.5198 | 0.0023*  | -0.4998 | 0.0031**  |
| PC(18:0p/18:0) | DBIL       | -0.3644 | NS | 0.1756  | NS | -0.4513 | 0.0095** | 0.0763  | NS        |
| PC(18:0p/18:0) | AST        | -0.2917 | NS | 0.0052  | NS | -0.3692 | 0.0376*  | -0.1308 | NS        |
| PC(18:0p/18:0) | Creatinine | -0.2206 | NS | 0.3375  | NS | -0.3701 | 0.0371*  | -0.0441 | NS        |
| PC(18:1e/16:0) | HGB        | -0.3752 | NS | -0.0031 | NS | -0.3807 | 0.0316*  | -0.2405 | NS        |
| PC(18:1e/16:0) | DBIL       | -0.2135 | NS | -0.1467 | NS | -0.4120 | 0.0191*  | -0.4568 | 0.0075**  |
| PC(18:1e/16:0) | TBIL       | -0.0858 | NS | -0.1438 | NS | -0.5182 | 0.0024** | -0.5582 | 0.0007*** |
| PC(18:1e/16:0) | IBIL       | -0.0686 | NS | -0.1455 | NS | -0.4961 | 0.0039** | -0.5314 | 0.0015**  |
| PC(18:2/20:3)  | ALP        | -0.1166 | NS | -0.2612 | NS | -0.3804 | 0.0317*  | -0.0507 | NS        |
| PC(18:2/20:3)  | Mg         | 0.1108  | NS | 0.0385  | NS | -0.3861 | 0.0424*  | -0.1091 | NS        |
| PC(18:2/20:3)  | DBIL       | 0.1693  | NS | 0.1054  | NS | -0.3834 | 0.0303*  | -0.2079 | NS        |
| PC(18:2/20:3)  | Monocytes  | 0.4020  | NS | 0.1286  | NS | -0.3586 | 0.0439*  | -0.0381 | NS        |
| PC(18:2e/12:0) | DBIL       | -0.4736 | NS | -0.0124 | NS | -0.4489 | 0.0100*  | -0.0259 | NS        |
| PC(18:2e/12:0) | TBIL       | -0.4118 | NS | -0.1180 | NS | -0.4587 | 0.0083** | 0.0020  | NS        |
| PC(18:2e/12:0) | IBIL       | -0.3725 | NS | -0.1558 | NS | -0.4226 | 0.0160*  | 0.0204  | NS        |
| PC(18:2e/12:0) | Creatinine | -0.2892 | NS | -0.2260 | NS | -0.3800 | 0.0319*  | 0.0814  | NS        |
| PC(18:2e/16:0) | Albumin    | -0.2109 | NS | 0.1187  | NS | -0.3501 | 0.0495*  | 0.2074  | NS        |
| PC(18:2e/16:0) | HGB        | -0.1288 | NS | 0.2212  | NS | -0.4866 | 0.0047** | 0.2840  | NS        |
| PC(18:2e/16:0) | HCT        | -0.1239 | NS | 0.2116  | NS | -0.3648 | 0.0401*  | 0.3358  | NS        |
| PC(18:2e/16:0) | RBC        | 0.0086  | NS | 0.3209  | NS | -0.4994 | 0.0036** | 0.3419  | NS        |
| PC(18:2e/18:0) | HGB        | -0.3679 | NS | -0.0176 | NS | -0.3511 | 0.0488*  | -0.0940 | NS        |
| PC(18:2e/18:0) | Creatinine | -0.2794 | NS | 0.3953  | NS | -0.3866 | 0.0288*  | -0.0998 | NS        |
| PC(18:2e/18:0) | RBC        | -0.2489 | NS | 0.2198  | NS | -0.4527 | 0.0093** | -0.1604 | NS        |
| PC(18:2e/18:0) | r-GT       | -0.1538 | NS | -0.2521 | NS | -0.3995 | 0.0235*  | -0.2291 | NS        |



|                |                |         |    |         |    |         |          |         |          |
|----------------|----------------|---------|----|---------|----|---------|----------|---------|----------|
| PC(18:2e/18:0) | UA             | 0.0454  | NS | 0.0712  | NS | -0.4652 | 0.0073** | -0.1324 | NS       |
| PC(18:2p/18:2) | AST            | -0.2363 | NS | -0.0021 | NS | -0.3812 | 0.0314*  | 0.0655  | NS       |
| PE(18:0/22:5)  | HGB            | -0.1030 | NS | 0.2610  | NS | -0.4809 | 0.0053** | -0.2451 | NS       |
| PE(18:0/22:5)  | RBC            | -0.0765 | NS | 0.2058  | NS | -0.4306 | 0.0139*  | -0.3551 | 0.0426*  |
| PI(16:0/20:3)  | Monocytes      | -0.2168 | NS | 0.2891  | NS | -0.4667 | 0.0071** | -0.0275 | NS       |
| SM(d18:1/18:4) | Creatinine     | -0.4693 | NS | 0.2161  | NS | -0.3764 | 0.0337*  | 0.0473  | NS       |
| SM(d18:1/18:4) | AST            | -0.4146 | NS | -0.0187 | NS | -0.3553 | 0.0460*  | 0.0873  | NS       |
| SM(d18:1/18:4) | HGB            | -0.3270 | NS | -0.1243 | NS | -0.3772 | 0.0333*  | 0.1240  | NS       |
| TAG(48:1)      | Creatinine     | 0.1554  | NS | 0.4411  | NS | -0.4349 | 0.0129*  | 0.3277  | NS       |
| TAG(50:2)      | UA             | -0.0074 | NS | -0.0320 | NS | -0.4632 | 0.0076** | -0.1354 | NS       |
| TAG(50:2)      | Creatinine     | 0.1030  | NS | 0.1114  | NS | -0.3524 | 0.0479*  | -0.1247 | NS       |
| TAG(52:5)      | Monocytes      | -0.0688 | NS | -0.1616 | NS | -0.3920 | 0.0265*  | 0.0287  | NS       |
| DAG(14:0/16:0) | WBC            | -0.3848 | NS | -0.0155 | NS | 0.0451  | NS       | 0.4709  | 0.0057** |
| DAG(14:0/16:0) | HGB            | -0.0540 | NS | 0.0548  | NS | -0.1944 | NS       | 0.5035  | 0.0028** |
| DAG(14:0/16:0) | RBC            | -0.0258 | NS | 0.2714  | NS | -0.2317 | NS       | 0.4024  | 0.0203*  |
| DAG(14:0/16:0) | Creatinine     | 0.0564  | NS | -0.0712 | NS | -0.2637 | NS       | 0.4008  | 0.0208*  |
| DAG(14:0/18:0) | LDH            | -0.2304 | NS | -0.1094 | NS | -0.1215 | NS       | 0.3764  | 0.0308*  |
| DAG(14:0/18:2) | HGB            | 0.0015  | NS | 0.2945  | NS | -0.0658 | NS       | -0.4310 | 0.0123*  |
| DAG(14:0/18:2) | HCT            | 0.0898  | NS | 0.3150  | NS | -0.1030 | NS       | -0.3582 | 0.0407*  |
| DAG(16:0/16:0) | RBC            | 0.0760  | NS | -0.0980 | NS | -0.1949 | NS       | -0.3493 | 0.0463*  |
| DAG(16:0/16:1) | LDH            | -0.2475 | NS | -0.1466 | NS | -0.0958 | NS       | 0.3555  | 0.0423*  |
| DAG(16:0/16:1) | Creatinine     | -0.0858 | NS | 0.3602  | NS | -0.2821 | NS       | 0.4212  | 0.0147*  |
| DAG(16:1/18:0) | PT             | 0.3358  | NS | -0.1438 | NS | -0.1328 | NS       | -0.5462 | 0.0047** |
| DAG(16:1/18:0) | INR            | 0.3358  | NS | -0.1438 | NS | -0.1328 | NS       | -0.5462 | 0.0047** |
| DAG(18:0/18:0) | $\alpha$ -HBDH | 0.1738  | NS | -0.0173 | NS | -0.2114 | NS       | -0.4870 | 0.0136*  |
| DAG(18:0/18:0) | LDH            | 0.1904  | NS | -0.2638 | NS | -0.1337 | NS       | 0.3853  | 0.0268*  |

|                |                |         |    |         |    |         |    |         |          |
|----------------|----------------|---------|----|---------|----|---------|----|---------|----------|
| DAG(18:0/18:0) | Basophils      | 0.2415  | NS | 0.1456  | NS | 0.2854  | NS | -0.4271 | 0.0132*  |
| DAG(18:1/20:0) | PT             | -0.2284 | NS | -0.1807 | NS | -0.1774 | NS | -0.5792 | 0.0024** |
| DAG(18:1/20:0) | INR            | -0.2284 | NS | -0.1807 | NS | -0.1774 | NS | -0.5792 | 0.0024** |
| FFA(14:0)      | $\alpha$ -HBDH | -0.1878 | NS | 0.1346  | NS | -0.0215 | NS | 0.5180  | 0.0080** |
| FFA(14:0)      | Basophils      | -0.1463 | NS | -0.0620 | NS | 0.2115  | NS | 0.4309  | 0.0123*  |
| FFA(14:0)      | P              | -0.0775 | NS | 0.1467  | NS | 0.1194  | NS | -0.4006 | 0.0209*  |
| FFA(14:0)      | ALT            | 0.0613  | NS | -0.2211 | NS | 0.2522  | NS | -0.3759 | 0.0311*  |
| FFA(14:0)      | TP             | 0.2134  | NS | 0.0393  | NS | -0.1150 | NS | -0.3629 | 0.0379*  |
| FFA(14:0)      | UA             | 0.2281  | NS | -0.1971 | NS | 0.1998  | NS | -0.4322 | 0.0120*  |
| FFA(14:0)      | RBC            | 0.2747  | NS | -0.3478 | NS | 0.0757  | NS | -0.4034 | 0.0199*  |
| FFA(14:0)      | Albumin        | 0.2943  | NS | -0.0640 | NS | 0.0647  | NS | -0.4006 | 0.0209*  |
| FFA(14:0)      | r-GT           | 0.3838  | NS | 0.1426  | NS | 0.2130  | NS | -0.4253 | 0.0136*  |
| FFA(14:0)      | HGB            | 0.4647  | NS | 0.0393  | NS | 0.0730  | NS | -0.3464 | 0.0483*  |
| FFA(20:3)      | Creatinine     | -0.0956 | NS | 0.2632  | NS | -0.1687 | NS | 0.3463  | 0.0484*  |
| FFA(20:3)      | HCT            | -0.0773 | NS | 0.0052  | NS | 0.0154  | NS | 0.3862  | 0.0264*  |
| FFA(20:3)      | Mg             | -0.0062 | NS | -0.0156 | NS | -0.1614 | NS | 0.3460  | 0.0486*  |
| FFA(20:3)      | UA             | 0.0196  | NS | 0.1084  | NS | 0.0462  | NS | 0.4445  | 0.0095** |
| FFA(20:3)      | ALP            | 0.3387  | NS | -0.3314 | NS | -0.1495 | NS | 0.5159  | 0.0021** |
| FFA(20:4)      | WBC            | -0.1667 | NS | -0.0485 | NS | -0.0629 | NS | 0.3900  | 0.0248*  |
| FFA(20:4)      | CO2            | -0.0184 | NS | -0.1829 | NS | 0.0644  | NS | 0.4003  | 0.0385*  |
| FFA(20:4)      | RBC            | 0.0074  | NS | 0.2260  | NS | -0.2605 | NS | 0.3777  | 0.0302*  |
| FFA(20:4)      | HGB            | 0.0466  | NS | 0.0972  | NS | -0.2844 | NS | 0.4862  | 0.0041** |
| FFA(20:4)      | PT             | 0.1155  | NS | -0.4091 | NS | 0.0253  | NS | -0.4606 | 0.0205*  |
| FFA(20:4)      | INR            | 0.1155  | NS | -0.4091 | NS | 0.0253  | NS | -0.4606 | 0.0205*  |
| FFA(20:5)      | CO2            | -0.0492 | NS | -0.2366 | NS | 0.0954  | NS | 0.4290  | 0.0255*  |
| FFA(20:5)      | Mg             | 0.0296  | NS | 0.3811  | NS | -0.3575 | NS | 0.4723  | 0.0055** |

|                    |                |         |    |         |    |         |    |         |          |
|--------------------|----------------|---------|----|---------|----|---------|----|---------|----------|
| FFA(20:5)          | HGB            | 0.0319  | NS | 0.1003  | NS | -0.3421 | NS | 0.4673  | 0.0061** |
| FFA(20:5)          | PT             | 0.1217  | NS | -0.4351 | NS | 0.0670  | NS | -0.4633 | 0.0197*  |
| FFA(20:5)          | INR            | 0.1217  | NS | -0.4351 | NS | 0.0670  | NS | -0.4633 | 0.0197*  |
| FFA(22:3)          | UA             | -0.1214 | NS | 0.3044  | NS | 0.0883  | NS | 0.3633  | 0.0377*  |
| FFA(22:5)          | HCT            | -0.3323 | NS | -0.2528 | NS | 0.1483  | NS | -0.4228 | 0.0142*  |
| FFA(22:5)          | FIB            | -0.1054 | NS | 0.1107  | NS | -0.1526 | NS | 0.4039  | 0.0453*  |
| FFA(22:5)          | Glucose        | -0.0785 | NS | -0.0568 | NS | 0.1098  | NS | 0.3614  | 0.0388*  |
| HexCer(d18:1/22:1) | LDH            | -0.3921 | NS | 0.0253  | NS | 0.0124  | NS | -0.3961 | 0.0225*  |
| HexCer(d18:1/22:1) | ALP            | -0.3292 | NS | 0.1963  | NS | 0.2593  | NS | -0.3484 | 0.0469*  |
| HexCer(d18:1/22:1) | TT             | -0.2032 | NS | 0.2942  | NS | 0.2557  | NS | -0.4880 | 0.0133*  |
| HexCer(d18:1/22:1) | TP             | -0.0906 | NS | 0.1308  | NS | -0.0474 | NS | -0.3568 | 0.0415*  |
| HexCer(d18:1/22:1) | Albumin        | 0.1117  | NS | -0.0501 | NS | -0.1156 | NS | -0.3844 | 0.0272*  |
| HexCer(d18:1/22:1) | FIB            | 0.2705  | NS | -0.4118 | NS | -0.1781 | NS | 0.5575  | 0.0038** |
| LPC(15:0)          | HGB            | -0.4255 | NS | -0.0806 | NS | -0.3452 | NS | -0.4222 | 0.0144*  |
| LPC(15:0)          | TBIL           | -0.3799 | NS | -0.4025 | NS | -0.1610 | NS | -0.3590 | 0.0402*  |
| LPC(15:0)          | HCT            | -0.3433 | NS | -0.0753 | NS | -0.0878 | NS | -0.5314 | 0.0015** |
| LPC(15:0)          | RBC            | -0.2722 | NS | 0.2384  | NS | -0.1590 | NS | -0.4469 | 0.0091** |
| LPC(15:0)          | Albumin        | -0.2269 | NS | -0.0124 | NS | -0.1779 | NS | -0.4217 | 0.0145*  |
| LPC(16:0)          | CRP            | -0.3568 | NS | 0.2721  | NS | 0.1408  | NS | 0.4353  | 0.0114*  |
| LPC(16:1)          | CRP            | -0.2748 | NS | 0.3735  | NS | 0.1885  | NS | 0.3584  | 0.0406*  |
| LPC(16:1)          | Basophils      | -0.1729 | NS | 0.1894  | NS | 0.2976  | NS | -0.4320 | 0.0120*  |
| LPC(18:0)          | Mg             | 0.0468  | NS | 0.3571  | NS | -0.1246 | NS | 0.3965  | 0.0224*  |
| LPC(18:0)          | Basophils      | 0.0892  | NS | -0.0895 | NS | 0.2872  | NS | -0.3525 | 0.0442*  |
| LPC(18:1)          | APTT           | -0.1461 | NS | -0.0560 | NS | 0.3356  | NS | 0.4235  | 0.0349*  |
| LPC(18:1)          | TT             | 0.3152  | NS | 0.1490  | NS | 0.0907  | NS | -0.4229 | 0.0352*  |
| LPC(18:3)          | $\alpha$ -HBDH | 0.3499  | NS | -0.1150 | NS | 0.1150  | NS | 0.4699  | 0.0178*  |

|             |             |         |    |         |    |         |    |         |           |
|-------------|-------------|---------|----|---------|----|---------|----|---------|-----------|
| LPC(22:1)   | Albumin     | -0.3703 | NS | -0.0712 | NS | -0.0992 | NS | -0.4119 | 0.0172*   |
| LPC(22:1)   | PT          | -0.1552 | NS | -0.1392 | NS | 0.2152  | NS | 0.5746  | 0.0027**  |
| LPC(22:1)   | INR         | -0.1552 | NS | -0.1392 | NS | 0.2152  | NS | 0.5746  | 0.0027**  |
| LPC(22:1)   | Lymphocytes | -0.0858 | NS | -0.1352 | NS | 0.0664  | NS | -0.3707 | 0.0337*   |
| LPC(O/16:0) | DBIL        | -0.4761 | NS | -0.3337 | NS | -0.2228 | NS | -0.3685 | 0.0349*   |
| LPC(O/16:0) | HCT         | -0.2796 | NS | -0.1084 | NS | -0.1386 | NS | -0.5695 | 0.0005*** |
| LPC(O/16:0) | Albumin     | -0.1888 | NS | -0.0847 | NS | -0.1781 | NS | -0.3809 | 0.0288*   |
| LPC(O/16:0) | RBC         | -0.1643 | NS | 0.2178  | NS | -0.1764 | NS | -0.4779 | 0.0049**  |
| LPC(O/18:0) | Albumin     | -0.2906 | NS | 0.0650  | NS | -0.0691 | NS | -0.4101 | 0.0178*   |
| LPC(O/18:0) | RBC         | -0.2244 | NS | 0.2570  | NS | -0.2327 | NS | -0.3733 | 0.0324*   |
| LPC(O/18:0) | ALP         | 0.1840  | NS | -0.1817 | NS | 0.1295  | NS | -0.3463 | 0.0484*   |
| LPE(14:0)   | IBIL        | -0.2892 | NS | -0.1806 | NS | -0.3350 | NS | -0.5642 | 0.0006*** |
| LPE(14:0)   | Glucose     | -0.0037 | NS | -0.0733 | NS | 0.0936  | NS | 0.4261  | 0.0134*   |
| LPE(20:0)   | Basophils   | 0.1059  | NS | 0.3823  | NS | -0.0339 | NS | 0.3441  | 0.0499*   |
| LPE(20:3)   | IBIL        | -0.4583 | NS | -0.2178 | NS | -0.0644 | NS | -0.4218 | 0.0145*   |
| LPE(20:4)   | Creatinine  | -0.4436 | NS | 0.2301  | NS | -0.1003 | NS | -0.4065 | 0.0189*   |
| LPE(20:4)   | TBIL        | -0.4436 | NS | -0.2359 | NS | 0.0075  | NS | -0.4445 | 0.0095**  |
| LPE(20:4)   | IBIL        | -0.3922 | NS | -0.1827 | NS | 0.0556  | NS | -0.3524 | 0.0443*   |
| LPE(20:4)   | HCT         | -0.3421 | NS | 0.0712  | NS | -0.1241 | NS | -0.4298 | 0.0126*   |
| LPE(20:5)   | CRP         | -0.3225 | NS | 0.2442  | NS | 0.1779  | NS | 0.3724  | 0.0328*   |
| LPE(20:5)   | HCT         | -0.2342 | NS | 0.0877  | NS | -0.1787 | NS | 0.3480  | 0.0472*   |
| LPE(20:5)   | PT          | 0.1589  | NS | 0.1298  | NS | 0.2959  | NS | 0.4428  | 0.0266*   |
| LPE(20:5)   | INR         | 0.1589  | NS | 0.1298  | NS | 0.2959  | NS | 0.4428  | 0.0266*   |
| LPE(22:6)   | DBIL        | -0.4356 | NS | -0.2045 | NS | -0.2015 | NS | -0.4309 | 0.0123*   |
| MAG(22:5)   | ALP         | 0.2626  | NS | 0.1311  | NS | -0.0007 | NS | -0.3536 | 0.0435*   |
| MAG(22:5)   | CO2         | 0.3897  | NS | -0.3471 | NS | 0.2551  | NS | 0.4299  | 0.0252*   |

|                |            |         |    |         |    |         |    |         |           |
|----------------|------------|---------|----|---------|----|---------|----|---------|-----------|
| PA(16:0/18:0)  | BUN        | -0.1755 | NS | 0.2953  | NS | 0.0400  | NS | 0.3495  | 0.0462*   |
| PC(14:0/16:0)  | DBIL       | -0.0368 | NS | -0.2676 | NS | -0.3300 | NS | -0.5629 | 0.0006*** |
| PC(14:0/16:0)  | TBIL       | 0.1078  | NS | -0.2162 | NS | -0.2546 | NS | -0.5434 | 0.0011**  |
| PC(14:0/16:0)  | IBIL       | 0.1152  | NS | -0.1889 | NS | -0.2010 | NS | -0.5222 | 0.0018**  |
| PC(16:0/20:0)  | TBIL       | 0.0417  | NS | 0.1148  | NS | 0.1490  | NS | -0.3676 | 0.0353*   |
| PC(16:0/20:0)  | HCT        | 0.0478  | NS | -0.2363 | NS | -0.0627 | NS | -0.3557 | 0.0422*   |
| PC(16:0/20:0)  | DBIL       | 0.1681  | NS | 0.1612  | NS | -0.0150 | NS | -0.4782 | 0.0049**  |
| PC(16:0/20:0)  | FIB        | 0.3088  | NS | 0.3071  | NS | -0.2765 | NS | 0.4763  | 0.0161*   |
| PC(16:0/20:3)  | CO2        | 0.0910  | NS | 0.2531  | NS | 0.0229  | NS | -0.4052 | 0.0360*   |
| PC(16:0e/16:0) | PLT        | 0.0515  | NS | 0.4326  | NS | 0.3221  | NS | -0.3799 | 0.0292*   |
| PC(16:0e/18:0) | Albumin    | -0.0822 | NS | -0.0785 | NS | -0.1586 | NS | -0.3705 | 0.0338*   |
| PC(16:0e/18:1) | Glucose    | -0.0552 | NS | -0.0361 | NS | 0.0063  | NS | 0.4291  | 0.0127*   |
| PC(16:0e/20:2) | HCT        | -0.3299 | NS | -0.1723 | NS | -0.1413 | NS | -0.4970 | 0.0033**  |
| PC(16:0e/20:2) | HGB        | -0.2857 | NS | -0.1592 | NS | -0.2338 | NS | -0.4304 | 0.0124*   |
| PC(16:0e/20:2) | RBC        | -0.2085 | NS | -0.0526 | NS | -0.3137 | NS | -0.4686 | 0.0060**  |
| PC(16:0e/20:2) | Creatinine | -0.1029 | NS | 0.0836  | NS | -0.3118 | NS | -0.4070 | 0.0188*   |
| PC(16:0e/20:2) | WBC        | 0.2010  | NS | 0.0382  | NS | 0.0891  | NS | -0.3640 | 0.0373*   |
| PC(16:0e/20:4) | Albumin    | -0.1275 | NS | 0.0382  | NS | 0.0194  | NS | 0.4121  | 0.0172*   |
| PC(16:0e/20:4) | Basophils  | -0.0544 | NS | 0.0723  | NS | 0.2276  | NS | -0.4412 | 0.0102*   |
| PC(16:0e/20:4) | TP         | -0.0441 | NS | -0.0879 | NS | -0.2243 | NS | 0.3614  | 0.0388*   |
| PC(16:0e/20:4) | ALP        | 0.1399  | NS | -0.0114 | NS | 0.0616  | NS | 0.4287  | 0.0128*   |
| PC(16:0e/20:4) | P          | 0.2129  | NS | -0.1539 | NS | -0.1602 | NS | 0.3773  | 0.0304*   |
| PC(16:0p/16:0) | Basophils  | 0.1644  | NS | 0.2101  | NS | -0.1512 | NS | -0.3797 | 0.0293*   |
| PC(16:0p/16:0) | P          | 0.2905  | NS | 0.0227  | NS | -0.2531 | NS | 0.4432  | 0.0098**  |
| PC(16:0p/18:0) | HCT        | -0.3519 | NS | 0.0237  | NS | -0.1516 | NS | -0.5067 | 0.0026**  |
| PC(16:0p/18:0) | RBC        | -0.3311 | NS | 0.1331  | NS | -0.2105 | NS | -0.3727 | 0.0327*   |

|                |             |         |    |         |    |         |    |         |           |
|----------------|-------------|---------|----|---------|----|---------|----|---------|-----------|
| PC(16:0p/18:0) | FIB         | -0.0319 | NS | -0.0941 | NS | -0.1413 | NS | 0.4154  | 0.0389*   |
| PC(16:0p/18:0) | Ca          | 0.1092  | NS | -0.0217 | NS | 0.0935  | NS | 0.3615  | 0.0387*   |
| PC(16:0p/18:1) | Neutrophils | -0.3985 | NS | 0.0506  | NS | -0.0374 | NS | 0.3500  | 0.0459*   |
| PC(16:0p/20:0) | RDW         | -0.1296 | NS | 0.0455  | NS | 0.0658  | NS | 0.3769  | 0.0306*   |
| PC(16:0p/20:1) | HCT         | -0.2710 | NS | -0.3808 | NS | -0.1025 | NS | -0.3825 | 0.0280*   |
| PC(16:0p/20:1) | Basophils   | -0.2662 | NS | -0.2583 | NS | 0.1638  | NS | 0.3591  | 0.0402*   |
| PC(16:0p/20:1) | HGB         | -0.2587 | NS | -0.3907 | NS | -0.1164 | NS | -0.3536 | 0.0435*   |
| PC(16:0p/20:1) | RBC         | -0.1704 | NS | -0.2178 | NS | -0.2471 | NS | -0.3971 | 0.0221*   |
| PC(16:0p/20:1) | Creatinine  | -0.0882 | NS | -0.1847 | NS | -0.1474 | NS | -0.4049 | 0.0194*   |
| PC(16:0p/20:1) | UA          | 0.1006  | NS | -0.4097 | NS | -0.1642 | NS | -0.3539 | 0.0433*   |
| PC(16:0p/22:6) | Basophils   | -0.1129 | NS | 0.0138  | NS | 0.2210  | NS | -0.3951 | 0.0229*   |
| PC(18:0e/16:0) | Albumin     | -0.0159 | NS | -0.0145 | NS | -0.1450 | NS | -0.3474 | 0.0476*   |
| PC(18:0e/18:0) | HCT         | -0.4758 | NS | 0.1827  | NS | 0.0033  | NS | -0.3758 | 0.0311*   |
| PC(18:0e/18:0) | TBIL        | -0.3211 | NS | 0.1076  | NS | 0.0280  | NS | -0.3513 | 0.0450*   |
| PC(18:0e/18:0) | IBIL        | -0.2868 | NS | 0.2632  | NS | 0.0524  | NS | -0.3602 | 0.0395*   |
| PC(18:0e/18:0) | Glucose     | -0.0576 | NS | 0.0382  | NS | 0.0706  | NS | 0.3923  | 0.0239*   |
| PC(18:0e/18:0) | BUN         | -0.0540 | NS | 0.2446  | NS | -0.1248 | NS | 0.5106  | 0.0024**  |
| PC(18:0p/16:0) | Glucose     | -0.1496 | NS | 0.0237  | NS | 0.0706  | NS | 0.3875  | 0.0259*   |
| PC(18:0p/18:1) | DBIL        | -0.3541 | NS | -0.2744 | NS | 0.1099  | NS | -0.4263 | 0.0134*   |
| PC(18:0p/18:1) | Basophils   | -0.2667 | NS | -0.0328 | NS | 0.1211  | NS | 0.3618  | 0.0386*   |
| PC(18:0p/18:1) | UA          | -0.2545 | NS | -0.2176 | NS | 0.1411  | NS | -0.4038 | 0.0198*   |
| PC(18:0p/18:1) | Ca          | -0.0174 | NS | 0.2455  | NS | 0.2930  | NS | 0.4704  | 0.0057**  |
| PC(18:0p/18:1) | Neutrophils | -0.0149 | NS | 0.0516  | NS | -0.0489 | NS | -0.3829 | 0.0278*   |
| PC(18:0p/18:1) | HGB         | -0.0074 | NS | -0.3016 | NS | -0.0151 | NS | -0.5883 | 0.0003*** |
| PC(18:0p/18:1) | HCT         | 0.0459  | NS | -0.3380 | NS | 0.1513  | NS | -0.6550 | 0.0000*** |
| PC(18:0p/18:1) | RBC         | 0.0670  | NS | -0.3638 | NS | 0.1366  | NS | -0.6344 | 0.0001*** |

|                |             |         |    |         |    |         |    |         |           |
|----------------|-------------|---------|----|---------|----|---------|----|---------|-----------|
| PC(18:1e/16:0) | Glucose     | -0.0601 | NS | 0.0093  | NS | 0.0378  | NS | 0.4027  | 0.0202*   |
| PC(18:1e/18:1) | DBIL        | -0.2010 | NS | -0.2338 | NS | 0.0132  | NS | -0.3878 | 0.0258*   |
| PC(18:1e/18:1) | Ca          | -0.0057 | NS | 0.4077  | NS | 0.2563  | NS | 0.4429  | 0.0099**  |
| PC(18:1e/18:1) | HCT         | 0.0832  | NS | -0.3580 | NS | -0.0082 | NS | -0.6572 | 0.0000*** |
| PC(18:1e/18:1) | HGB         | 0.0918  | NS | -0.3468 | NS | -0.0479 | NS | -0.5223 | 0.0018**  |
| PC(18:1e/18:1) | WBC         | 0.2294  | NS | -0.3979 | NS | 0.0523  | NS | -0.3825 | 0.0280*   |
| PC(18:2e/12:0) | Glucose     | -0.1496 | NS | 0.1228  | NS | 0.2743  | NS | 0.3577  | 0.0410*   |
| PC(18:2e/16:0) | Neutrophils | -0.0993 | NS | 0.0361  | NS | -0.0651 | NS | 0.4274  | 0.0131*   |
| PC(18:2e/16:0) | Basophils   | -0.0892 | NS | -0.0723 | NS | 0.1372  | NS | -0.3993 | 0.0213*   |
| PC(18:2p/18:2) | RBC         | -0.0773 | NS | 0.3189  | NS | -0.2030 | NS | 0.3449  | 0.0493*   |
| PC(18:2p/20:4) | Basophils   | -0.1129 | NS | 0.0620  | NS | 0.2451  | NS | -0.3914 | 0.0243*   |
| PE(16:0/18:0)  | Lymphocytes | 0.0748  | NS | -0.4427 | NS | -0.1298 | NS | -0.3514 | 0.0449*   |
| PE(16:0/22:4)  | UA          | -0.3479 | NS | -0.3056 | NS | -0.0825 | NS | -0.4091 | 0.0181*   |
| PE(16:0/22:4)  | DBIL        | -0.1129 | NS | -0.2335 | NS | -0.0906 | NS | -0.3860 | 0.0265*   |
| PE(16:0/22:4)  | Basophils   | -0.0905 | NS | -0.3964 | NS | 0.1561  | NS | 0.3592  | 0.0401*   |
| PE(18:0/22:5)  | Monocytes   | -0.4348 | NS | -0.1330 | NS | -0.1521 | NS | -0.4192 | 0.0152*   |
| PE(18:0/22:5)  | TBIL        | -0.3798 | NS | -0.2115 | NS | -0.2896 | NS | -0.3661 | 0.0361*   |
| PE(18:0/22:5)  | DBIL        | -0.3704 | NS | -0.2909 | NS | -0.2434 | NS | -0.3440 | 0.0490*   |
| PE(18:0/22:5)  | IBIL        | -0.3440 | NS | -0.1044 | NS | -0.2775 | NS | -0.3836 | 0.0275*   |
| PE(18:0/22:5)  | TT          | -0.1004 | NS | 0.0497  | NS | -0.1276 | NS | -0.4223 | 0.0355*   |
| PE(18:0/22:5)  | CK-MB       | -0.0382 | NS | -0.1706 | NS | -0.1392 | NS | -0.4460 | 0.0093**  |
| PE(18:0/22:5)  | FIB         | 0.2972  | NS | 0.2290  | NS | 0.1384  | NS | 0.4408  | 0.0274*   |
| PI(16:0/20:3)  | CRP         | -0.2663 | NS | 0.3648  | NS | 0.0428  | NS | 0.3977  | 0.0219*   |
| PI(18:0/20:3)  | CO2         | -0.0697 | NS | 0.2777  | NS | -0.1449 | NS | 0.4601  | 0.0157*   |
| SM(d18:1/16:0) | P           | 0.3553  | NS | -0.0557 | NS | 0.2155  | NS | -0.4400 | 0.0104*   |
| SM(d18:1/18:2) | RBC         | -0.3691 | NS | -0.0808 | NS | 0.0507  | NS | -0.4922 | 0.0036**  |

|                |             |         |    |         |    |         |    |         |           |
|----------------|-------------|---------|----|---------|----|---------|----|---------|-----------|
| SM(d18:1/18:2) | HCT         | -0.2999 | NS | 0.2040  | NS | 0.0413  | NS | -0.5589 | 0.0007*** |
| SM(d18:1/18:2) | HGB         | -0.2010 | NS | 0.2036  | NS | 0.0525  | NS | -0.4615 | 0.0069**  |
| SM(d18:1/18:2) | Creatinine  | 0.0560  | NS | -0.1162 | NS | -0.0265 | NS | -0.5530 | 0.0008*** |
| SM(d18:1/18:2) | Neutrophils | 0.2735  | NS | -0.1389 | NS | -0.1346 | NS | -0.4594 | 0.0072**  |
| SM(d18:1/18:2) | WBC         | 0.3326  | NS | -0.0737 | NS | -0.1202 | NS | -0.3984 | 0.0216*   |
| SM(d18:1/18:2) | DBIL        | 0.4286  | NS | -0.1135 | NS | -0.1314 | NS | -0.3521 | 0.0445*   |
| SM(d18:1/18:3) | Glucose     | -0.0810 | NS | 0.2797  | NS | -0.1213 | NS | 0.3590  | 0.0402*   |
| SM(d18:1/18:4) | Basophils   | 0.0810  | NS | -0.0104 | NS | 0.1610  | NS | -0.3612 | 0.0389*   |
| SM(d18:1/22:0) | DBIL        | -0.1006 | NS | -0.2107 | NS | -0.1009 | NS | -0.4540 | 0.0080**  |
| SM(d18:1/22:0) | TBIL        | 0.0466  | NS | -0.0217 | NS | -0.1129 | NS | -0.4769 | 0.0050**  |
| SM(d18:1/22:0) | IBIL        | 0.0588  | NS | 0.1434  | NS | -0.1117 | NS | -0.5067 | 0.0026**  |
| SM(d18:1/22:0) | TT          | 0.1921  | NS | 0.3649  | NS | 0.0336  | NS | -0.4475 | 0.0249*   |
| SM(d18:1/22:3) | DBIL        | -0.3485 | NS | -0.2025 | NS | -0.0976 | NS | -0.4428 | 0.0099**  |
| SM(d18:1/22:3) | TBIL        | -0.2426 | NS | -0.0135 | NS | -0.1223 | NS | -0.4840 | 0.0043**  |
| SM(d18:1/22:3) | IBIL        | -0.2181 | NS | 0.1765  | NS | -0.1225 | NS | -0.5147 | 0.0022**  |
| SM(d18:1/22:3) | TT          | 0.2069  | NS | 0.4103  | NS | 0.2210  | NS | -0.4607 | 0.0205*   |
| TAG(50:0)      | RBC         | -0.0137 | NS | -0.1734 | NS | -0.0374 | NS | -0.5091 | 0.0025**  |
| TAG(50:0)      | Ca          | 0.0298  | NS | -0.3004 | NS | -0.1599 | NS | 0.4054  | 0.0193*   |
| TAG(50:0)      | HGB         | 0.0447  | NS | -0.0621 | NS | 0.1275  | NS | -0.5317 | 0.0014**  |
| TAG(50:0)      | HCT         | 0.0497  | NS | -0.0851 | NS | -0.0898 | NS | -0.5867 | 0.0003*** |
| TAG(50:0)      | Neutrophils | 0.1167  | NS | -0.0399 | NS | 0.2424  | NS | -0.4302 | 0.0125*   |
| TAG(50:0)      | WBC         | 0.3499  | NS | -0.1461 | NS | 0.1692  | NS | -0.3488 | 0.0467*   |
| TAG(50:2)      | Eosinophils | -0.0399 | NS | -0.4548 | NS | 0.0865  | NS | 0.3988  | 0.0215*   |

**Abbreviation: Abbreviation:** ALP, alkaline phosphatase; ALT, alanine aminotransferase; APTT, activated partial thromboplastin time; AST, aspartate aminotransferase; BUN, blood urea nitrogen; Ca, calcium; CK-MB, creatine kinase-myocardial band; CRP, C-reactive protein; DAG, diacylglycerol; DBIL,



direct bilirubin; FIB, FFA, free fatty acid; fibrinogen; HCs, healthy controls; IBIL, indirect bilirubin; INR, international normalized ratio; LDH, lactate dehydrogenase; LPC, lysoPhosphatidylcholine; LPE, lysoPhosphatidylethanolamine; M, moderate; MCH, mean corpuscular hemoglobin; MCHC, mean corpuscular hemoglobin concentration; MCV, mean corpuscular volume; Mg, magnesium; P, phosphorus; PC, phosphatidylcholine; PCT, plateletcrit; PDW, platelet distribution width; PE, phosphatidylethanolamine; PT, prothrombin time; PI, phosphatidylinositol; RAs, recovered asymptomatic patients; RBC, red blood cell; RDW, red blood cell volume distribution width; RMs, recovered moderate patients; RSs, recovered critical and severe patients; S, critical and severe; SM, sphingomyelin; TAG, triacylglycerol; TBIL, total bilirubin; TT, thrombin time; UA, urine acid; WBC, white blood cell;  $\alpha$ -HBDH,  $\alpha$ -hydroxybutyrate dehydrogenase;  $\gamma$ -GT,  $\gamma$ -glutamyl transpeptidase; Statistical significance was set at 2-sided. \* $p < 0.05$ , \*\* $p < 0.01$ , \*\*\* $p < 0.001$ .
